# Supplementary material for: The impact on the ring related vibrational frequencies of pyridine of hydrogen bonds with haloforms – a topology perspective
Source: Royal Society of Chemistry journal article supplement (doi:10.1039/c8cp04789h), 2018-12-19
Supplement: c8cp04789h1.pdf [file c8cp04789h1.pdf]

## Supporting Information

### Part I - Benchmarking

#### SI.1. 1 Reference Spectra

##### 1. Pyridine

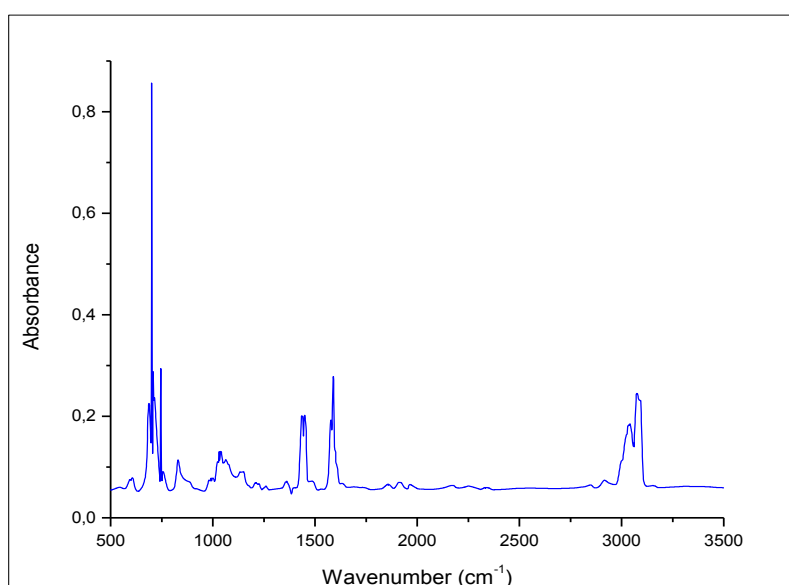

**Figure SI.1.1** Infrared Spectrum of Pyridine in the Gas Phase. Adapted from: *Webbook.nist.gov*, 2018.

**Table SI.1.1** Infrared Wavenumbers of Pyridine in the Gas Phase. Data from: J. K. Wilmschurst, H. J. Bernstein, *Can. J. Chem.*, 1957, **35**, 1183-1194.

|                                    |      |      |      |
|------------------------------------|------|------|------|
| Wavenumber<br>( $\text{cm}^{-1}$ ) | 749  | 1148 | 3036 |
| 374                                | 886  | 1217 | 3054 |
| 405                                | 942  | 1218 | 3054 |
| 605                                | 981  | 1375 | 3054 |
| 652                                | 992  | 1439 | 3083 |
| 675                                | 1029 | 1482 |      |
| 703                                | 1068 | 1572 |      |
|                                    | 1068 | 1580 |      |

## 2. CHF<sub>3</sub>

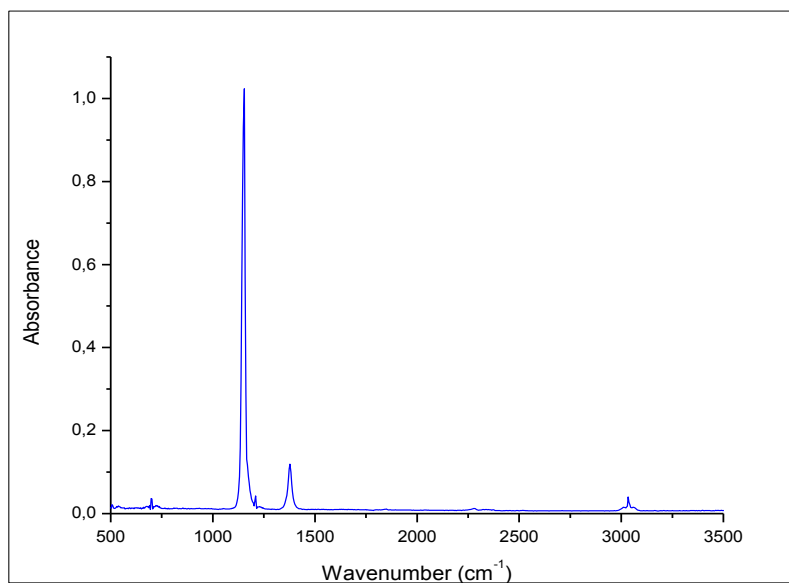

**Figure SI.1.2** Infrared Spectrum of Fluoroform in the Gas Phase. Adapted from: *Webbook.nist.gov*, 2018.

**Table SI.1.2** Infrared Wavenumbers of Fluoroform in the Gas Phase. Data from: T. Shimanouchi, *Tables of molecular vibrational frequencies*, National Bureau of Standards; for sale by the Supt. of Docs., U.S. Govt. Print. Off., Washington, 1972.

| Wavenumber<br>(cm <sup>-1</sup> ) |
|-----------------------------------|
| 507                               |
| 507                               |
| 700                               |
| 1117                              |
| 1152                              |
| 1152                              |
| 1372                              |
| 1372                              |
| 3036                              |

### 3. CHCl<sub>3</sub>

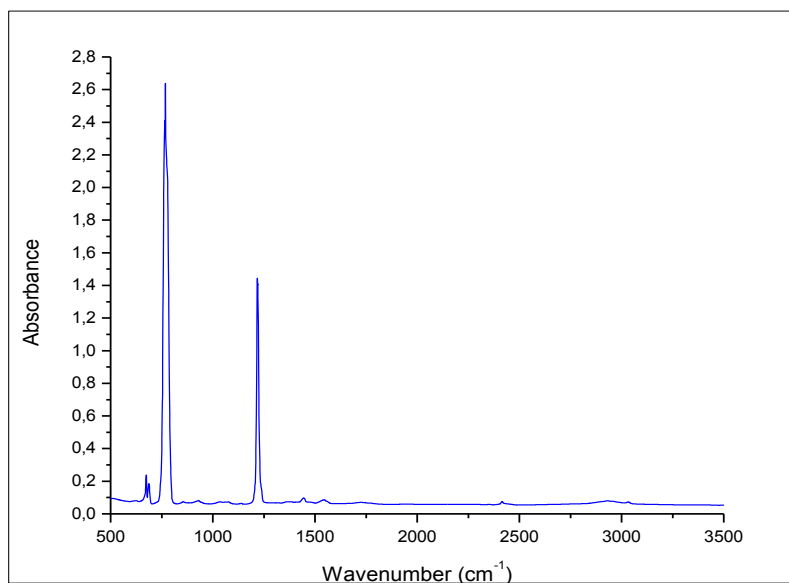

**Figure SI.1.3** Infrared Spectrum of Chloroform in the Gas Phase. Adapted from: *Webbook.nist.gov*, 2018.

**Table SI.1.3** Infrared Wavenumbers of Chloroform in the Gas Phase. Data from: T. Shimanouchi, *Tables of molecular vibrational frequencies*, National Bureau of Standards; for sale by the Supt. of Docs., U.S. Govt. Print. Off., Washington, 1972.

| Wavenumber<br>(cm <sup>-1</sup> ) |
|-----------------------------------|
| 261                               |
| 261                               |
| 363                               |
| 680                               |
| 774                               |
| 774                               |
| 1220                              |
| 1220                              |
| 3034                              |

#### 4. $\text{CHBr}_3$

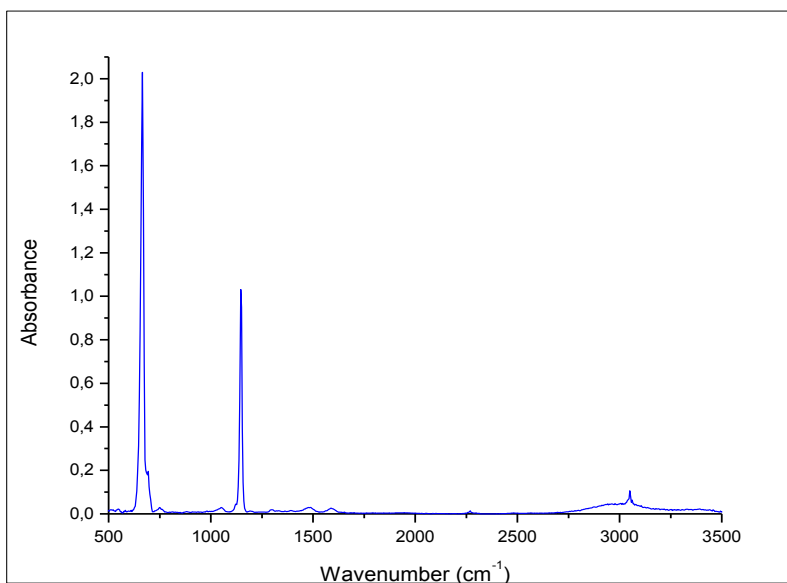

**Figure SI.1.4** Infrared Spectrum of Bromoform in the Gas Phase. Adapted from: *Webbook.nist.gov*, 2018.

**Table SI.1.4** Infrared Wavenumbers of Bromoform in the Gas Phase. Data from: T. Shimanouchi, *Tables of molecular vibrational frequencies*, National Bureau of Standards; for sale by the Supt. of Docs., U.S. Govt. Print. Off., Washington, 1972.

| Wavenumber<br>( $\text{cm}^{-1}$ ) |
|------------------------------------|
| 155                                |
| 155                                |
| 222                                |
| 541                                |
| 669                                |
| 669                                |
| 1149                               |
| 1149                               |
| 3042                               |

## 5. $\text{CH}_3$

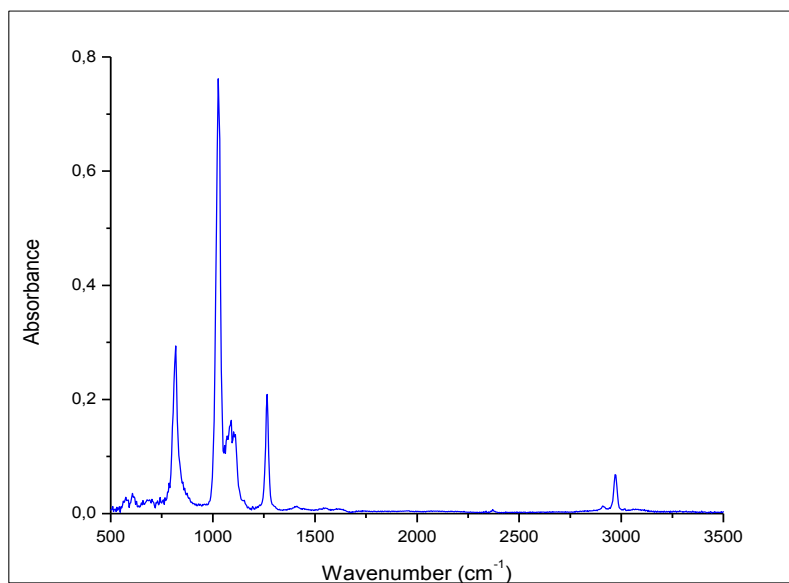

**Figure SI.1.5** Infrared Spectrum of Bromoform in the Gas Phase. Adapted from: *Webbook.nist.gov*, 2018.

**Table SI.1.5** Infrared Wavenumbers of Bromoform in the Gas Phase. Data from: N. Neto, O. Oehler and R. Hexter, *The Journal of Chemical Physics*, 1973, **58**, 5661-5672.

| Wavenumber<br>( $\text{cm}^{-1}$ ) |
|------------------------------------|
| 110                                |
| 110                                |
| 154                                |
| 425                                |
| 578                                |
| 578                                |
| 1068                               |
| 1068                               |
| 2982                               |

## SI.1.2 Optimised Geometries

### 1. Pyridine

B3LYP / 6-311++G\*\*

|   |              |              |             |
|---|--------------|--------------|-------------|
| C | 0.721166000  | 1.141491000  | 0.000000000 |
| C | -0.671490000 | 1.196239000  | 0.000000000 |
| C | -1.382631000 | 0.000000000  | 0.000000000 |
| C | -0.671490000 | -1.196240000 | 0.000000000 |
| C | 0.721166000  | -1.141491000 | 0.000000000 |
| N | 1.416184000  | 0.000000000  | 0.000000000 |
| H | -2.466582000 | 0.000000000  | 0.000000000 |
| H | 1.306252000  | 2.056533000  | 0.000000000 |
| H | -1.179769000 | 2.152923000  | 0.000000000 |
| H | -1.179768000 | -2.152923000 | 0.000000000 |
| H | 1.306252000  | -2.056533000 | 0.000000000 |

B3LYP / aug-cc-PVTZ

|   |              |              |             |
|---|--------------|--------------|-------------|
| C | 0.719454000  | 1.139658000  | 0.000000000 |
| C | -0.669549000 | 1.193136000  | 0.000000000 |
| C | -1.378525000 | 0.000000000  | 0.000000000 |
| C | -0.669549000 | -1.193135000 | 0.000000000 |
| C | 0.719453000  | -1.139658000 | 0.000000000 |
| N | 1.411743000  | 0.000000000  | 0.000000000 |
| H | -2.459969000 | 0.000000000  | 0.000000000 |
| H | 1.302383000  | 2.053254000  | 0.000000000 |
| H | -1.177354000 | 2.147260000  | 0.000000000 |
| H | -1.177354000 | -2.147260000 | 0.000000000 |
| H | 1.302383000  | -2.053253000 | 0.000000000 |

B3LYP / DGDZVP

|   |             |             |              |
|---|-------------|-------------|--------------|
| C | 0.000000000 | 1.144436000 | 0.723784000  |
| C | 0.000000000 | 1.200386000 | -0.674122000 |
| C | 0.000000000 | 0.000000000 | -1.388955000 |

|   |             |              |              |
|---|-------------|--------------|--------------|
| C | 0.000000000 | -1.200386000 | -0.674122000 |
| C | 0.000000000 | -1.144436000 | 0.723784000  |
| N | 0.000000000 | 0.000000000  | 1.422699000  |
| H | 0.000000000 | 0.000000000  | -2.476123000 |
| H | 0.000000000 | 2.062578000  | 1.309958000  |
| H | 0.000000000 | 2.160669000  | -1.182452000 |
| H | 0.000000000 | -2.160669000 | -1.182452000 |
| H | 0.000000000 | -2.062578000 | 1.309958000  |

**PBE0/6-311++G\*\***

|   |              |              |             |
|---|--------------|--------------|-------------|
| C | 0.000000000  | 1.345196000  | 0.000000000 |
| C | -1.204203000 | 0.649911000  | 0.000000000 |
| C | -1.165630000 | -0.737881000 | 0.000000000 |
| C | 0.072241000  | -1.366478000 | 0.000000000 |
| C | 1.215872000  | -0.575507000 | 0.000000000 |
| N | 1.193848000  | 0.755741000  | 0.000000000 |
| H | -2.082540000 | -1.318329000 | 0.000000000 |
| H | 0.005078000  | 2.432656000  | 0.000000000 |
| H | -2.145770000 | 1.187848000  | 0.000000000 |
| H | 0.155656000  | -2.447665000 | 0.000000000 |
| H | 2.200963000  | -1.036147000 | 0.000000000 |

**PBE0/ aug-cc-PVTZ**

|   |              |              |             |
|---|--------------|--------------|-------------|
| C | 1.213620000  | 0.575407000  | 0.000000000 |
| C | 0.071732000  | 1.363346000  | 0.000000000 |
| C | -1.162961000 | 0.735662000  | 0.000000000 |
| C | -1.201169000 | -0.648891000 | 0.000000000 |
| C | 0.000000000  | -1.343118000 | 0.000000000 |
| N | 1.191110000  | -0.753466000 | 0.000000000 |
| H | -2.078513000 | 1.314832000  | 0.000000000 |
| H | 2.196509000  | 1.036790000  | 0.000000000 |
| H | 0.154032000  | 2.442807000  | 0.000000000 |

|   |              |              |             |
|---|--------------|--------------|-------------|
| H | -2.141302000 | -1.185697000 | 0.000000000 |
| H | 0.004170000  | -2.428903000 | 0.000000000 |

**PBE0/DGDZVP**

|   |              |              |             |
|---|--------------|--------------|-------------|
| C | 0.000000000  | 1.347907000  | 0.000000000 |
| C | -1.207252000 | 0.651065000  | 0.000000000 |
| C | -1.169164000 | -0.740334000 | 0.000000000 |
| C | 0.072342000  | -1.369708000 | 0.000000000 |
| C | 1.218475000  | -0.576345000 | 0.000000000 |
| N | 1.197826000  | 0.758481000  | 0.000000000 |
| H | -2.087340000 | -1.321752000 | 0.000000000 |
| H | 0.004393000  | 2.436951000  | 0.000000000 |
| H | -2.149921000 | 1.190413000  | 0.000000000 |
| H | 0.156846000  | -2.452474000 | 0.000000000 |
| H | 2.204827000  | -1.038022000 | 0.000000000 |

**B2PLYP-D3 / 6-311++G\*\***

|   |              |              |             |
|---|--------------|--------------|-------------|
| C | 0.721533000  | 1.142502000  | 0.000000000 |
| C | -0.672813000 | 1.197586000  | 0.000000000 |
| C | -1.385544000 | 0.000000000  | 0.000000000 |
| C | -0.672813000 | -1.197586000 | 0.000000000 |
| C | 0.721533000  | -1.142502000 | 0.000000000 |
| N | 1.420890000  | 0.000000000  | 0.000000000 |
| H | -2.469239000 | 0.000000000  | 0.000000000 |
| H | 1.306174000  | 2.057087000  | 0.000000000 |
| H | -1.180356000 | 2.154412000  | 0.000000000 |
| H | -1.180356000 | -2.154412000 | 0.000000000 |
| H | 1.306175000  | -2.057087000 | 0.000000000 |

**B2PLYP-D3 / aug-cc-PVTZ**

|   |              |             |             |
|---|--------------|-------------|-------------|
| C | 0.719442000  | 1.140622000 | 0.000000000 |
| C | -0.670551000 | 1.193979000 | 0.000000000 |
| C | -1.380711000 | 0.000000000 | 0.000000000 |



|   |              |              |             |
|---|--------------|--------------|-------------|
| C | -0.670551000 | -1.193979000 | 0.000000000 |
| C | 0.719441000  | -1.140622000 | 0.000000000 |
| N | 1.415751000  | 0.000000000  | 0.000000000 |
| H | -2.461346000 | 0.000000000  | 0.000000000 |
| H | 1.301814000  | 2.053181000  | 0.000000000 |
| H | -1.177481000 | 2.147719000  | 0.000000000 |
| H | -1.177481000 | -2.147719000 | 0.000000000 |
| H | 1.301814000  | -2.053181000 | 0.000000000 |

**B2PLYP-D3 / DGDZVP**

|   |              |              |             |
|---|--------------|--------------|-------------|
| C | 0.724006000  | 1.146573000  | 0.000000000 |
| C | -0.675330000 | 1.201683000  | 0.000000000 |
| C | -1.391205000 | 0.000000000  | 0.000000000 |
| C | -0.675330000 | -1.201683000 | 0.000000000 |
| C | 0.724006000  | -1.146573000 | 0.000000000 |
| N | 1.426748000  | 0.000000000  | 0.000000000 |
| H | -2.477926000 | 0.000000000  | 0.000000000 |
| H | 1.310531000  | 2.063487000  | 0.000000000 |
| H | -1.183629000 | 2.161592000  | 0.000000000 |
| H | -1.183629000 | -2.161592000 | 0.000000000 |
| H | 1.310531000  | -2.063487000 | 0.000000000 |

**M06-2X / 6-311++G\*\***

|   |              |              |             |
|---|--------------|--------------|-------------|
| C | 0.000000000  | 1.346416000  | 0.000000000 |
| C | -1.204979000 | 0.650265000  | 0.000000000 |
| C | -1.166434000 | -0.738180000 | 0.000000000 |
| C | 0.071868000  | -1.367363000 | 0.000000000 |
| C | 1.216878000  | -0.576288000 | 0.000000000 |
| N | 1.194492000  | 0.755940000  | 0.000000000 |
| H | -2.082151000 | -1.317842000 | 0.000000000 |
| H | 0.005247000  | 2.432104000  | 0.000000000 |
| H | -2.144742000 | 1.188021000  | 0.000000000 |

|   |             |              |             |
|---|-------------|--------------|-------------|
| H | 0.155821000 | -2.446850000 | 0.000000000 |
| H | 2.200386000 | -1.036120000 | 0.000000000 |

**M06-2X / aug-cc-PVTZ**

|   |              |              |             |
|---|--------------|--------------|-------------|
| C | 0.718342000  | 1.136524000  | 0.000000000 |
| C | -0.668704000 | 1.191120000  | 0.000000000 |
| C | -1.376229000 | 0.000000000  | 0.000000000 |
| C | -0.668704000 | -1.191120000 | 0.000000000 |
| C | 0.718342000  | -1.136524000 | 0.000000000 |
| N | 1.409594000  | 0.000000000  | 0.000000000 |
| H | -2.457906000 | 0.000000000  | 0.000000000 |
| H | 1.301434000  | 2.049988000  | 0.000000000 |
| H | -1.175200000 | 2.145749000  | 0.000000000 |
| H | -1.175200000 | -2.145749000 | 0.000000000 |
| H | 1.301434000  | -2.049988000 | 0.000000000 |

**M06-2X / DGDZVP**

|   |              |              |             |
|---|--------------|--------------|-------------|
| C | 0.721663000  | 1.140306000  | 0.000000000 |
| C | -0.672343000 | 1.196774000  | 0.000000000 |
| C | -1.384581000 | 0.000000000  | 0.000000000 |
| C | -0.672343000 | -1.196774000 | 0.000000000 |
| C | 0.721663000  | -1.140306000 | 0.000000000 |
| N | 1.418393000  | 0.000000000  | 0.000000000 |
| H | -2.470258000 | 0.000000000  | 0.000000000 |
| H | 1.307829000  | 2.056398000  | 0.000000000 |
| H | -1.179251000 | 2.155848000  | 0.000000000 |
| H | -1.179251000 | -2.155848000 | 0.000000000 |
| H | 1.307829000  | -2.056398000 | 0.000000000 |

**$\omega$ B97X-D / 6-311++G\*\***

|   |              |             |             |
|---|--------------|-------------|-------------|
| C | 0.719373000  | 1.137541000 | 0.000000000 |
| C | -0.669818000 | 1.193236000 | 0.000000000 |
| C | -1.379342000 | 0.000000000 | 0.000000000 |

|   |              |              |             |
|---|--------------|--------------|-------------|
| C | -0.669818000 | -1.193236000 | 0.000000000 |
| C | 0.719373000  | -1.137541000 | 0.000000000 |
| N | 1.412825000  | 0.000000000  | 0.000000000 |
| H | -2.463676000 | 0.000000000  | 0.000000000 |
| H | 1.305003000  | 2.052621000  | 0.000000000 |
| H | -1.177357000 | 2.150451000  | 0.000000000 |
| H | -1.177357000 | -2.150451000 | 0.000000000 |
| H | 1.305003000  | -2.052621000 | 0.000000000 |

**ωB97X-D / aug-cc-PVTZ**

|   |              |              |             |
|---|--------------|--------------|-------------|
| C | 0.717541000  | 1.135604000  | 0.000000000 |
| C | -0.667983000 | 1.190083000  | 0.000000000 |
| C | -1.375422000 | 0.000000000  | 0.000000000 |
| C | -0.667983000 | -1.190083000 | 0.000000000 |
| C | 0.717541000  | -1.135604000 | 0.000000000 |
| N | 1.409026000  | 0.000000000  | 0.000000000 |
| H | -2.457020000 | 0.000000000  | 0.000000000 |
| H | 1.300703000  | 2.049228000  | 0.000000000 |
| H | -1.174866000 | 2.144582000  | 0.000000000 |
| H | -1.174866000 | -2.144582000 | 0.000000000 |
| H | 1.300703000  | -2.049228000 | 0.000000000 |

**ωB97X-D / DGDZVP**

|   |              |              |             |
|---|--------------|--------------|-------------|
| C | 0.721075000  | 1.139763000  | 0.000000000 |
| C | -0.671703000 | 1.196102000  | 0.000000000 |
| C | -1.383838000 | 0.000000000  | 0.000000000 |
| C | -0.671703000 | -1.196102000 | 0.000000000 |
| C | 0.721075000  | -1.139763000 | 0.000000000 |
| N | 1.417737000  | 0.000000000  | 0.000000000 |
| H | -2.469242000 | 0.000000000  | 0.000000000 |
| H | 1.306828000  | 2.056122000  | 0.000000000 |
| H | -1.179006000 | 2.154793000  | 0.000000000 |

|   |              |              |             |
|---|--------------|--------------|-------------|
| H | -1.179006000 | -2.154793000 | 0.000000000 |
| H | 1.306828000  | -2.056122000 | 0.000000000 |

**MP2 / 6-311++G\*\***

|   |              |              |             |
|---|--------------|--------------|-------------|
| C | 0.723134000  | 1.144879000  | 0.000000000 |
| C | -0.674919000 | 1.199434000  | 0.000000000 |
| C | -1.391747000 | 0.000000000  | 0.000000000 |
| C | -0.674919000 | -1.199434000 | 0.000000000 |
| C | 0.723134000  | -1.144879000 | 0.000000000 |
| N | 1.428308000  | 0.000000000  | 0.000000000 |
| H | -2.478190000 | 0.000000000  | 0.000000000 |
| H | 1.308550000  | 2.061927000  | 0.000000000 |
| H | -1.182585000 | 2.159423000  | 0.000000000 |
| H | -1.182585000 | -2.159423000 | 0.000000000 |
| H | 1.308550000  | -2.061927000 | 0.000000000 |

**MP2 / aug-cc-PVTZ**

|   |              |              |             |
|---|--------------|--------------|-------------|
| C | 0.720134000  | 1.142639000  | 0.000000000 |
| C | -0.671832000 | 1.194475000  | 0.000000000 |
| C | -1.385142000 | 0.000000000  | 0.000000000 |
| C | -0.671832000 | -1.194476000 | 0.000000000 |
| C | 0.720134000  | -1.142638000 | 0.000000000 |
| N | 1.421310000  | 0.000000000  | 0.000000000 |
| H | -2.467043000 | 0.000000000  | 0.000000000 |
| H | 1.302938000  | 2.056149000  | 0.000000000 |
| H | -1.178386000 | 2.150020000  | 0.000000000 |
| H | -1.178386000 | -2.150020000 | 0.000000000 |
| H | 1.302938000  | -2.056148000 | 0.000000000 |

**MP2 / DGDZVP**

|   |             |             |              |
|---|-------------|-------------|--------------|
| C | 0.000000000 | 1.152483000 | 0.726021000  |
| C | 0.000000000 | 1.204577000 | -0.677838000 |
| C | 0.000000000 | 0.000000000 | -1.397544000 |

|   |             |              |              |
|---|-------------|--------------|--------------|
| C | 0.000000000 | -1.204577000 | -0.677838000 |
| C | 0.000000000 | -1.152483000 | 0.726021000  |
| N | 0.000000000 | 0.000000000  | 1.434181000  |
| H | 0.000000000 | 0.000000000  | -2.488122000 |
| H | 0.000000000 | 2.071279000  | 1.316000000  |
| H | 0.000000000 | 2.167950000  | -1.188038000 |
| H | 0.000000000 | -2.167950000 | -1.188038000 |
| H | 0.000000000 | -2.071279000 | 1.316000000  |

## 2. CHF<sub>3</sub>

### B3LYP / 6-311++G\*\* (C,H), DGDZVP (F)

|   |              |              |              |
|---|--------------|--------------|--------------|
| C | 0.000000000  | 0.000000000  | 0.340955000  |
| H | -0.000005000 | 0.000001000  | 1.430912000  |
| F | -0.084438000 | 1.258854000  | -0.128765000 |
| F | -1.047981000 | -0.702553000 | -0.128765000 |
| F | 1.132420000  | -0.556301000 | -0.128764000 |

### B3LYP / aug-cc-PVTZ (C,H), DGDZVP (F)

|   |              |              |              |
|---|--------------|--------------|--------------|
| C | 0.000002000  | 0.000001000  | 0.341030000  |
| H | 0.000009000  | 0.000001000  | 1.428906000  |
| F | 1.255723000  | -0.077126000 | -0.128708000 |
| F | -0.561070000 | 1.126049000  | -0.128707000 |
| F | -0.694656000 | -1.048924000 | -0.128706000 |

### B3LYP / DGDZVP

|   |              |              |              |
|---|--------------|--------------|--------------|
| C | 0.000001000  | 0.000000000  | 0.339698000  |
| H | 0.000003000  | -0.000002000 | 1.432059000  |
| F | 0.094556000  | -1.259953000 | -0.128528000 |
| F | 1.043875000  | 0.711865000  | -0.128528000 |
| F | -1.138431000 | 0.548089000  | -0.128527000 |

### B3LYP / 6-311++G\*\*

|   |              |              |              |
|---|--------------|--------------|--------------|
| C | 0.000000000  | 0.000000000  | 0.341396000  |
| H | 0.000002000  | 0.000000000  | 1.430982000  |
| F | 0.370124000  | -1.203008000 | -0.128865000 |
| F | 0.856776000  | 0.922041000  | -0.128865000 |
| F | -1.226900000 | 0.280968000  | -0.128865000 |

### B3LYP / aug-cc-PVTZ

|   |              |              |              |
|---|--------------|--------------|--------------|
| C | 0.000000000  | 0.000001000  | 0.340216000  |
| H | -0.000003000 | 0.000004000  | 1.429082000  |
| F | 0.553341000  | -1.128242000 | -0.128532000 |
| F | 0.700417000  | 1.043327000  | -0.128533000 |

|   |              |             |              |
|---|--------------|-------------|--------------|
| F | -1.253758000 | 0.084914000 | -0.128533000 |
|---|--------------|-------------|--------------|

**PBE0/ 6-311++G\*\* (C,H), DGDZVP (F)**

|   |              |              |              |
|---|--------------|--------------|--------------|
| C | 0.000000000  | -0.000001000 | 0.337669000  |
| H | 0.000002000  | 0.000007000  | 1.429284000  |
| F | -1.245708000 | -0.139684000 | -0.127974000 |
| F | 0.743825000  | -1.008972000 | -0.127974000 |
| F | 0.501884000  | 1.148656000  | -0.127975000 |

**PBE0/ aug-cc-PVTZ (C,H), DGDZVP (F)**

|   |              |              |              |
|---|--------------|--------------|--------------|
| C | 0.000000000  | 0.000001000  | 0.337880000  |
| H | 0.000000000  | 0.000002000  | 1.428307000  |
| F | -0.436668000 | 1.171148000  | -0.127985000 |
| F | -0.795911000 | -0.963740000 | -0.127984000 |
| F | 1.232579000  | -0.207409000 | -0.127985000 |

**PBE0/ DGDZVP**

|   |              |              |              |
|---|--------------|--------------|--------------|
| C | -0.000001000 | 0.000000000  | 0.336352000  |
| H | 0.000001000  | 0.000001000  | 1.428763000  |
| F | 1.250793000  | 0.101202000  | -0.127662000 |
| F | -0.713040000 | 1.032616000  | -0.127662000 |
| F | -0.537752000 | -1.133819000 | -0.127662000 |

**PBE0/ 6-311++G\*\***

|   |              |              |              |
|---|--------------|--------------|--------------|
| C | -0.000001000 | 0.000001000  | 0.338299000  |
| H | -0.000004000 | 0.000003000  | 1.429692000  |
| F | 0.456468000  | -1.163922000 | -0.128128000 |
| F | 0.779755000  | 0.977272000  | -0.128129000 |
| F | -1.236221000 | 0.186649000  | -0.128130000 |

**PBE0/ aug-cc-PVTZ**

|   |              |             |              |
|---|--------------|-------------|--------------|
| C | 0.000001000  | 0.000000000 | 0.337173000  |
| H | -0.000003000 | 0.000003000 | 1.428667000  |
| F | 1.241681000  | 0.131155000 | -0.127841000 |
| F | -0.734425000 | 1.009748000 | -0.127841000 |

|                                                  |              |              |              |
|--------------------------------------------------|--------------|--------------|--------------|
| F                                                | -0.507257000 | -1.140903000 | -0.127841000 |
| <b>B2PLYP-D3 / 6-311++G** (C,H), DGDZVP (F)</b>  |              |              |              |
| C                                                | 0.000000000  | 0.000000000  | 0.340322000  |
| H                                                | 0.000000000  | 0.000002000  | 1.427909000  |
| F                                                | 0.208257000  | -1.242052000 | -0.128512000 |
| F                                                | 0.971521000  | 0.801382000  | -0.128513000 |
| F                                                | -1.179778000 | 0.440670000  | -0.128513000 |
| <b>B2PLYP-D3 / aug-cc-PVTZ (C,H), DGDZVP (F)</b> |              |              |              |
| C                                                | 0.000002000  | 0.000000000  | 0.339145000  |
| H                                                | 0.000003000  | 0.000007000  | 1.423740000  |
| F                                                | -0.680905000 | -1.052883000 | -0.128096000 |
| F                                                | 1.252277000  | -0.063238000 | -0.128097000 |
| F                                                | -0.571374000 | 1.116120000  | -0.128097000 |
| <b>B2PLYP-D3 / DGDZVP</b>                        |              |              |              |
| C                                                | 0.000000000  | 0.000000000  | 0.340052000  |
| H                                                | 0.000000000  | 0.000002000  | 1.429958000  |
| F                                                | -1.239051000 | 0.236048000  | -0.128528000 |
| F                                                | 0.415102000  | -1.191073000 | -0.128529000 |
| F                                                | 0.823949000  | 0.955025000  | -0.128529000 |
| <b>B2PLYP-D3 / 6-311++G**</b>                    |              |              |              |
| C                                                | 0.000000000  | -0.000001000 | 0.340584000  |
| H                                                | -0.000001000 | -0.000004000 | 1.427730000  |
| F                                                | 1.027227000  | -0.722662000 | -0.128565000 |
| F                                                | 0.112231000  | 1.250935000  | -0.128564000 |
| F                                                | -1.139459000 | -0.528272000 | -0.128565000 |
| <b>B2PLYP-D3 / aug-cc-PVTZ</b>                   |              |              |              |
| C                                                | 0.000002000  | 0.000000000  | 0.340141000  |
| H                                                | 0.000000000  | -0.000010000 | 1.426271000  |
| F                                                | 1.251693000  | -0.072279000 | -0.128412000 |
| F                                                | -0.563251000 | 1.120136000  | -0.128411000 |



|   |              |              |              |
|---|--------------|--------------|--------------|
| F | -0.688444000 | -1.047855000 | -0.128412000 |
|---|--------------|--------------|--------------|

M06-2X / 6-311++G\*\* (C,H), DGDZVP (F)

|   |              |              |              |
|---|--------------|--------------|--------------|
| C | 0.000001000  | 0.000000000  | 0.339079000  |
| H | -0.000007000 | 0.000000000  | 1.426730000  |
| F | -0.623231000 | -1.079365000 | -0.128193000 |
| F | 1.246392000  | -0.000040000 | -0.128192000 |
| F | -0.623161000 | 1.079405000  | -0.128193000 |

M06-2X / aug-cc-PVTZ (C,H), DGDZVP (F)

|   |              |              |              |
|---|--------------|--------------|--------------|
| C | -0.000001000 | 0.000001000  | 0.339079000  |
| H | -0.000008000 | 0.000001000  | 1.426730000  |
| F | -0.618396000 | -1.082142000 | -0.128193000 |
| F | 1.246379000  | 0.005535000  | -0.128192000 |
| F | -0.627982000 | 1.076607000  | -0.128193000 |

M06-2X / DGDZVP

|   |              |              |              |
|---|--------------|--------------|--------------|
| C | -0.000009000 | -0.000012000 | 0.339395000  |
| H | 0.000026000  | -0.000041000 | 1.429019000  |
| F | -0.605244000 | -1.096545000 | -0.128750000 |
| F | 1.252231000  | 0.024134000  | -0.128730000 |
| F | -0.646991000 | 1.072415000  | -0.128726000 |

M06-2X / 6-311++G\*\*

|   |              |              |              |
|---|--------------|--------------|--------------|
| C | 0.000020000  | 0.000009000  | 0.340507000  |
| H | -0.000022000 | 0.000037000  | 1.429020000  |
| F | 0.634373000  | 1.075047000  | -0.129135000 |
| F | -1.248218000 | 0.011852000  | -0.129091000 |
| F | 0.613845000  | -1.086885000 | -0.129081000 |

M06-2X / aug-cc-PVTZ

|   |              |              |              |
|---|--------------|--------------|--------------|
| C | -0.000004000 | -0.000004000 | 0.339787000  |
| H | -0.000034000 | 0.000001000  | 1.427566000  |
| F | -1.136555000 | -0.513297000 | -0.128379000 |
| F | 1.012772000  | -0.727638000 | -0.128405000 |

|   |             |             |              |
|---|-------------|-------------|--------------|
| F | 0.123807000 | 1.240921000 | -0.128367000 |
|---|-------------|-------------|--------------|

$\omega$ B97X-D / 6-311++G\*\* (C,H), DGDZVP (F)

|   |             |              |             |
|---|-------------|--------------|-------------|
| C | 0.000010000 | -0.000006000 | 0.337391000 |
|---|-------------|--------------|-------------|

|   |              |              |             |
|---|--------------|--------------|-------------|
| H | -0.000009000 | -0.000003000 | 1.427356000 |
|---|--------------|--------------|-------------|

|   |             |              |              |
|---|-------------|--------------|--------------|
| F | 1.222688000 | -0.256278000 | -0.127842000 |
|---|-------------|--------------|--------------|

|   |              |             |              |
|---|--------------|-------------|--------------|
| F | -0.389401000 | 1.187011000 | -0.127839000 |
|---|--------------|-------------|--------------|

|   |              |              |              |
|---|--------------|--------------|--------------|
| F | -0.833293000 | -0.930729000 | -0.127841000 |
|---|--------------|--------------|--------------|

$\omega$ B97X-D / aug-cc-PVTZ (C,H), DGDZVP (F)

|   |              |              |             |
|---|--------------|--------------|-------------|
| C | -0.000001000 | -0.000006000 | 0.337392000 |
|---|--------------|--------------|-------------|

|   |             |              |             |
|---|-------------|--------------|-------------|
| H | 0.000005000 | -0.000006000 | 1.427357000 |
|---|-------------|--------------|-------------|

|   |              |             |              |
|---|--------------|-------------|--------------|
| F | -0.143490000 | 1.240981000 | -0.127840000 |
|---|--------------|-------------|--------------|

|   |              |              |              |
|---|--------------|--------------|--------------|
| F | -1.002982000 | -0.744754000 | -0.127842000 |
|---|--------------|--------------|--------------|

|   |             |              |              |
|---|-------------|--------------|--------------|
| F | 1.146472000 | -0.496223000 | -0.127842000 |
|---|-------------|--------------|--------------|

$\omega$ B97X-D / DGDZVP

|   |             |             |             |
|---|-------------|-------------|-------------|
| C | 0.000001000 | 0.000000000 | 0.337388000 |
|---|-------------|-------------|-------------|

|   |              |             |             |
|---|--------------|-------------|-------------|
| H | -0.000003000 | 0.000009000 | 1.427353000 |
|---|--------------|-------------|-------------|

|   |              |             |              |
|---|--------------|-------------|--------------|
| F | -1.091840000 | 0.607064000 | -0.127841000 |
|---|--------------|-------------|--------------|

|   |             |              |              |
|---|-------------|--------------|--------------|
| F | 0.020185000 | -1.249091000 | -0.127839000 |
|---|-------------|--------------|--------------|

|   |             |             |              |
|---|-------------|-------------|--------------|
| F | 1.071655000 | 0.642026000 | -0.127840000 |
|---|-------------|-------------|--------------|

$\omega$ B97X-D / 6-311++G\*\*

|   |             |             |             |
|---|-------------|-------------|-------------|
| C | 0.000000000 | 0.000005000 | 0.337389000 |
|---|-------------|-------------|-------------|

|   |             |             |             |
|---|-------------|-------------|-------------|
| H | 0.000002000 | 0.000005000 | 1.427354000 |
|---|-------------|-------------|-------------|

|   |              |              |              |
|---|--------------|--------------|--------------|
| F | -0.143735000 | -1.240955000 | -0.127839000 |
|---|--------------|--------------|--------------|

|   |             |             |              |
|---|-------------|-------------|--------------|
| F | 1.146571000 | 0.495998000 | -0.127841000 |
|---|-------------|-------------|--------------|

|   |              |             |              |
|---|--------------|-------------|--------------|
| F | -1.002836000 | 0.744953000 | -0.127841000 |
|---|--------------|-------------|--------------|

$\omega$ B97X-D / aug-cc-PVTZ

|   |              |             |             |
|---|--------------|-------------|-------------|
| C | -0.000001000 | 0.000006000 | 0.337392000 |
|---|--------------|-------------|-------------|

|   |             |             |             |
|---|-------------|-------------|-------------|
| H | 0.000000000 | 0.000013000 | 1.427357000 |
|---|-------------|-------------|-------------|

|   |             |              |              |
|---|-------------|--------------|--------------|
| F | 0.146167000 | -1.240671000 | -0.127839000 |
|---|-------------|--------------|--------------|

|   |             |             |              |
|---|-------------|-------------|--------------|
| F | 1.001373000 | 0.746916000 | -0.127842000 |
|---|-------------|-------------|--------------|

|   |              |             |              |
|---|--------------|-------------|--------------|
| F | -1.147540000 | 0.493749000 | -0.127842000 |
|---|--------------|-------------|--------------|

MP2 / 6-311++G\*\* (C,H), DGDZVP (F)

|   |              |              |              |
|---|--------------|--------------|--------------|
| C | 0.000000000  | 0.000000000  | 0.339067000  |
| H | 0.000000000  | -0.000001000 | 1.427251000  |
| F | 0.980723000  | -0.789420000 | -0.128209000 |
| F | 0.193297000  | 1.244041000  | -0.128209000 |
| F | -1.174020000 | -0.454620000 | -0.128209000 |

MP2 / aug-cc-PVTZ (C,H), DGDZVP (F)

|   |              |              |              |
|---|--------------|--------------|--------------|
| C | 0.000000000  | 0.000000000  | 0.334582000  |
| H | 0.000000000  | 0.000000000  | 1.417073000  |
| F | 0.735074000  | -1.009797000 | -0.126836000 |
| F | 0.506975000  | 1.141490000  | -0.126836000 |
| F | -1.242049000 | -0.131692000 | -0.126836000 |

MP2 / DGDZVP

|   |              |              |              |
|---|--------------|--------------|--------------|
| C | 0.000000000  | 0.000000000  | 0.341237000  |
| H | 0.000000000  | 0.000000000  | 1.432456000  |
| F | 1.064088000  | 0.678281000  | -0.128884000 |
| F | -1.119453000 | 0.582387000  | -0.128884000 |
| F | 0.055365000  | -1.260668000 | -0.128884000 |

MP2 / 6-311++G\*\*

|   |              |              |              |
|---|--------------|--------------|--------------|
| C | 0.000000000  | 0.000000000  | 0.338737000  |
| H | -0.000002000 | -0.000001000 | 1.426343000  |
| F | 0.767305000  | -0.991905000 | -0.128102000 |
| F | 0.475364000  | 1.160457000  | -0.128102000 |
| F | -1.242668000 | -0.168552000 | -0.128103000 |

MP2 / aug-cc-PVTZ

|   |              |              |              |
|---|--------------|--------------|--------------|
| C | 0.000000000  | 0.000000000  | 0.339471000  |
| H | -0.000001000 | -0.000001000 | 1.425000000  |
| F | 0.688740000  | -1.044722000 | -0.128216000 |
| F | 0.560388000  | 1.118827000  | -0.128216000 |

F      -1.249127000      -0.074104000      -0.128216000

### 3. CHCl<sub>3</sub>

#### B3LYP / 6-311++G\*\* (C,H), DGDZVP (Cl)

|    |              |              |              |
|----|--------------|--------------|--------------|
| C  | -0.000002000 | 0.000028000  | 0.455654000  |
| H  | 0.000007000  | -0.000001000 | 1.537986000  |
| Cl | 1.348081000  | 1.041948000  | -0.083451000 |
| Cl | -1.576403000 | 0.646459000  | -0.083441000 |
| Cl | 0.228332000  | -1.688428000 | -0.083447000 |

#### B3LYP / aug-cc-PVTZ (C,H), DGDZVP (Cl)

|    |              |              |              |
|----|--------------|--------------|--------------|
| C  | -0.000002000 | -0.000031000 | 0.458460000  |
| H  | -0.000009000 | -0.000018000 | 1.537210000  |
| Cl | -1.357956000 | -1.022563000 | -0.084155000 |
| Cl | 1.564548000  | -0.664722000 | -0.084134000 |
| Cl | -0.206603000 | 1.687284000  | -0.084121000 |

#### B3LYP / DGDZVP

|    |              |              |              |
|----|--------------|--------------|--------------|
| C  | 0.000000000  | 0.000009000  | 0.457679000  |
| H  | -0.000002000 | 0.000001000  | 1.537596000  |
| Cl | 0.168642000  | -1.686252000 | -0.083993000 |
| Cl | 1.376021000  | 0.989172000  | -0.083994000 |
| Cl | -1.544663000 | 0.697077000  | -0.083994000 |

#### B3LYP / 6-311++G\*\*

|    |              |              |              |
|----|--------------|--------------|--------------|
| C  | -0.000014000 | 0.000024000  | 0.454776000  |
| H  | -0.000017000 | 0.000004000  | 1.537292000  |
| Cl | 0.242442000  | -1.685046000 | -0.082933000 |
| Cl | 1.338088000  | 1.052486000  | -0.082919000 |
| Cl | -1.580541000 | 0.632543000  | -0.082944000 |

#### B3LYP / aug-cc-PVTZ

|    |              |              |              |
|----|--------------|--------------|--------------|
| C  | 0.000001000  | 0.000001000  | 0.457675000  |
| H  | 0.000000000  | 0.000000000  | 1.537593000  |
| Cl | -0.706355000 | 1.540439000  | -0.083993000 |
| Cl | -0.980888000 | -1.381939000 | -0.083993000 |

|    |             |              |              |
|----|-------------|--------------|--------------|
| C1 | 1.687243000 | -0.158501000 | -0.083993000 |
|----|-------------|--------------|--------------|

**PBE0/ 6-311++G\*\* (C,H), DGDZVP (Cl)**

|    |              |              |              |
|----|--------------|--------------|--------------|
| C  | -0.000004000 | 0.000020000  | 0.451161000  |
| H  | 0.000000000  | 0.000001000  | 1.536152000  |
| Cl | 0.647283000  | -1.557037000 | -0.082074000 |
| Cl | 1.024796000  | 1.339091000  | -0.082074000 |
| Cl | -1.672070000 | 0.217931000  | -0.082067000 |

**PBE0/ aug-cc-PVTZ (C,H), DGDZVP (Cl)**

|    |              |              |              |
|----|--------------|--------------|--------------|
| C  | 0.000010000  | 0.000003000  | 0.455228000  |
| H  | -0.000011000 | -0.000008000 | 1.537363000  |
| Cl | -0.419472000 | 1.629089000  | -0.083827000 |
| Cl | -1.201104000 | -1.177832000 | -0.083830000 |
| Cl | 1.620567000  | -0.451262000 | -0.083830000 |

**PBE0/ DGDZVP**

|    |              |              |              |
|----|--------------|--------------|--------------|
| C  | -0.000004000 | -0.000006000 | 0.451605000  |
| H  | -0.000020000 | 0.000031000  | 1.538367000  |
| Cl | 1.170444000  | 1.215147000  | -0.082942000 |
| Cl | -1.637563000 | 0.406068000  | -0.082965000 |
| Cl | 0.467102000  | -1.621188000 | -0.082927000 |

**PBE0/ 6-311++G\*\***

|    |              |              |              |
|----|--------------|--------------|--------------|
| C  | -0.000011000 | -0.000003000 | 0.450160000  |
| H  | -0.000006000 | 0.000014000  | 1.535319000  |
| Cl | 0.438203000  | -1.627864000 | -0.081453000 |
| Cl | 1.190675000  | 1.193453000  | -0.081456000 |
| Cl | -1.628884000 | 0.434420000  | -0.081471000 |

**PBE0/ aug-cc-PVTZ**

|    |              |              |              |
|----|--------------|--------------|--------------|
| C  | 0.000006000  | 0.000004000  | 0.454292000  |
| H  | -0.000004000 | -0.000003000 | 1.537580000  |
| Cl | 1.677620000  | -0.041442000 | -0.083592000 |
| Cl | -0.802941000 | 1.473585000  | -0.083582000 |

|                                                   |              |              |              |
|---------------------------------------------------|--------------|--------------|--------------|
| C1                                                | -0.874679000 | -1.432152000 | -0.083593000 |
| <b>B2PLYP-D3 / 6-311++G** (C,H), DGDZVP (CI)</b>  |              |              |              |
| C                                                 | -0.000001000 | -0.000001000 | 0.459011000  |
| H                                                 | -0.000005000 | 0.000002000  | 1.538740000  |
| C1                                                | 0.941159000  | -1.400350000 | -0.084173000 |
| C1                                                | 0.742166000  | 1.515238000  | -0.084173000 |
| C1                                                | -1.683324000 | -0.114888000 | -0.084173000 |
| <b>B2PLYP-D3 / aug-cc-PVTZ (C,H), DGDZVP (CI)</b> |              |              |              |
| C                                                 | -0.000003000 | 0.000000000  | 0.459016000  |
| H                                                 | 0.000004000  | 0.000001000  | 1.538745000  |
| C1                                                | 1.681987000  | -0.132996000 | -0.084173000 |
| C1                                                | -0.725815000 | 1.523137000  | -0.084173000 |
| C1                                                | -0.956171000 | -1.390142000 | -0.084173000 |
| <b>B2PLYP-D3 / DGDZVP</b>                         |              |              |              |
| C                                                 | -0.000002000 | 0.000002000  | 0.459011000  |
| H                                                 | -0.000002000 | -0.000002000 | 1.538740000  |
| C1                                                | 0.735657000  | 1.518410000  | -0.084173000 |
| C1                                                | -1.682815000 | -0.122110000 | -0.084173000 |
| C1                                                | 0.947159000  | -1.396300000 | -0.084172000 |
| <b>B2PLYP-D3 / 6-311++G**</b>                     |              |              |              |
| C                                                 | -0.000006000 | -0.000002000 | 0.459014000  |
| H                                                 | -0.000002000 | 0.000004000  | 1.538743000  |
| C1                                                | 0.742819000  | 1.514918000  | -0.084173000 |
| C1                                                | -1.683372000 | -0.114162000 | -0.084174000 |
| C1                                                | 0.940555000  | -1.400756000 | -0.084173000 |
| <b>B2PLYP-D3 / aug-cc-PVTZ</b>                    |              |              |              |
| C                                                 | -0.000008000 | 0.000008000  | 0.459021000  |
| H                                                 | 0.000002000  | -0.000002000 | 1.538749000  |
| C1                                                | -1.659981000 | 0.302029000  | -0.084175000 |
| C1                                                | 0.568426000  | -1.588600000 | -0.084173000 |

|    |             |             |              |
|----|-------------|-------------|--------------|
| C1 | 1.091558000 | 1.286568000 | -0.084174000 |
|----|-------------|-------------|--------------|

M06-2X / 6-311++G\*\* (C,H), DGDZVP (CI)

|   |              |             |             |
|---|--------------|-------------|-------------|
| C | -0.000020000 | 0.000080000 | 0.456494000 |
|---|--------------|-------------|-------------|

|   |              |             |             |
|---|--------------|-------------|-------------|
| H | -0.000036000 | 0.000081000 | 1.539413000 |
|---|--------------|-------------|-------------|

|    |             |              |              |
|----|-------------|--------------|--------------|
| C1 | 1.416730000 | -0.913779000 | -0.083469000 |
|----|-------------|--------------|--------------|

|    |             |             |              |
|----|-------------|-------------|--------------|
| C1 | 0.083210000 | 1.683931000 | -0.083505000 |
|----|-------------|-------------|--------------|

|    |              |              |              |
|----|--------------|--------------|--------------|
| C1 | -1.499776000 | -0.770143000 | -0.083298000 |
|----|--------------|--------------|--------------|

M06-2X / aug-cc-PVTZ (C,H), DGDZVP (CI)

|   |             |             |             |
|---|-------------|-------------|-------------|
| C | 0.000010000 | 0.000033000 | 0.459855000 |
|---|-------------|-------------|-------------|

|   |              |              |             |
|---|--------------|--------------|-------------|
| H | -0.000065000 | -0.000119000 | 1.539347000 |
|---|--------------|--------------|-------------|

|    |             |             |              |
|----|-------------|-------------|--------------|
| C1 | 0.979106000 | 1.368437000 | -0.084609000 |
|----|-------------|-------------|--------------|

|    |              |             |              |
|----|--------------|-------------|--------------|
| C1 | -1.674618000 | 0.163951000 | -0.084495000 |
|----|--------------|-------------|--------------|

|    |             |              |              |
|----|-------------|--------------|--------------|
| C1 | 0.695548000 | -1.532280000 | -0.084467000 |
|----|-------------|--------------|--------------|

M06-2X / DGDZVP

|   |              |             |             |
|---|--------------|-------------|-------------|
| C | -0.000024000 | 0.000007000 | 0.457032000 |
|---|--------------|-------------|-------------|

|   |             |             |             |
|---|-------------|-------------|-------------|
| H | 0.000033000 | 0.000071000 | 1.541912000 |
|---|-------------|-------------|-------------|

|    |             |              |              |
|----|-------------|--------------|--------------|
| C1 | 0.421246000 | -1.633506000 | -0.084508000 |
|----|-------------|--------------|--------------|

|    |             |             |              |
|----|-------------|-------------|--------------|
| C1 | 1.203968000 | 1.181575000 | -0.084433000 |
|----|-------------|-------------|--------------|

|    |              |             |              |
|----|--------------|-------------|--------------|
| C1 | -1.625299000 | 0.451884000 | -0.084547000 |
|----|--------------|-------------|--------------|

M06-2X / 6-311++G\*\*

|   |             |             |             |
|---|-------------|-------------|-------------|
| C | 0.000020000 | 0.000028000 | 0.455675000 |
|---|-------------|-------------|-------------|

|   |             |             |             |
|---|-------------|-------------|-------------|
| H | 0.000120000 | 0.000140000 | 1.538734000 |
|---|-------------|-------------|-------------|

|    |              |             |              |
|----|--------------|-------------|--------------|
| C1 | -1.632495000 | 0.419045000 | -0.082978000 |
|----|--------------|-------------|--------------|

|    |             |              |              |
|----|-------------|--------------|--------------|
| C1 | 0.453236000 | -1.623290000 | -0.082978000 |
|----|-------------|--------------|--------------|

|    |             |             |              |
|----|-------------|-------------|--------------|
| C1 | 1.179204000 | 1.204182000 | -0.082934000 |
|----|-------------|-------------|--------------|

M06-2X / aug-cc-PVTZ

|   |              |              |             |
|---|--------------|--------------|-------------|
| C | -0.000015000 | -0.000187000 | 0.458616000 |
|---|--------------|--------------|-------------|

|   |             |              |             |
|---|-------------|--------------|-------------|
| H | 0.000043000 | -0.000450000 | 1.539208000 |
|---|-------------|--------------|-------------|

|    |             |             |              |
|----|-------------|-------------|--------------|
| C1 | 0.435734000 | 1.621330000 | -0.083793000 |
|----|-------------|-------------|--------------|

|    |              |              |              |
|----|--------------|--------------|--------------|
| C1 | -1.622128000 | -0.433253000 | -0.084177000 |
|----|--------------|--------------|--------------|



|                                                  |              |              |              |
|--------------------------------------------------|--------------|--------------|--------------|
| C1                                               | 1.186253000  | -1.188245000 | -0.084112000 |
| $\omega$ B97X-D / 6-311++G** (C,H), DGDZVP (Cl)  |              |              |              |
| C                                                | 0.000048000  | 0.000013000  | 0.453862000  |
| H                                                | -0.000016000 | 0.000007000  | 1.537605000  |
| Cl                                               | -0.861258000 | 1.455963000  | -0.082984000 |
| Cl                                               | -0.830274000 | -1.473847000 | -0.082976000 |
| Cl                                               | 1.691481000  | 0.017889000  | -0.082964000 |
| $\omega$ B97X-D / aug-cc-PVTZ (C,H), DGDZVP (Cl) |              |              |              |
| C                                                | 0.000015000  | 0.000042000  | 0.457631000  |
| H                                                | 0.000021000  | -0.000010000 | 1.537634000  |
| Cl                                               | -1.472160000 | -0.826211000 | -0.084223000 |
| Cl                                               | 1.451601000  | -0.861838000 | -0.084252000 |
| Cl                                               | 0.020567000  | 1.688000000  | -0.084217000 |
| $\omega$ B97X-D / DGDZVP                         |              |              |              |
| C                                                | 0.000012000  | -0.000028000 | 0.454383000  |
| H                                                | 0.000026000  | -0.000018000 | 1.539376000  |
| Cl                                               | 1.069364000  | -1.311137000 | -0.083671000 |
| Cl                                               | 0.600769000  | 1.581705000  | -0.083692000 |
| Cl                                               | -1.670124000 | -0.270527000 | -0.083669000 |
| $\omega$ B97X-D / 6-311++G**                     |              |              |              |
| C                                                | 0.000023000  | 0.000041000  | 0.453229000  |
| H                                                | 0.000023000  | 0.000035000  | 1.537148000  |
| Cl                                               | 1.566092000  | 0.638837000  | -0.082624000 |
| Cl                                               | -1.336293000 | 1.036797000  | -0.082560000 |
| Cl                                               | -0.229760000 | -1.675652000 | -0.082571000 |
| $\omega$ B97X-D / aug-cc-PVTZ                    |              |              |              |
| C                                                | -0.000002000 | -0.000018000 | 0.456568000  |
| H                                                | 0.000020000  | 0.000020000  | 1.537627000  |
| Cl                                               | -1.515608000 | -0.734528000 | -0.083861000 |
| Cl                                               | 1.393980000  | -0.945255000 | -0.083892000 |

|    |             |             |              |
|----|-------------|-------------|--------------|
| C1 | 0.121668000 | 1.679877000 | -0.083970000 |
|----|-------------|-------------|--------------|

MP2 / 6-311++G\*\* (C,H), DGDZVP (Cl)

|    |              |              |              |
|----|--------------|--------------|--------------|
| C  | 0.000001000  | 0.000000000  | 0.449496000  |
| H  | -0.000002000 | 0.000000000  | 1.534638000  |
| C1 | 1.676923000  | -0.159101000 | -0.082973000 |
| C1 | -0.700676000 | 1.531806000  | -0.082973000 |
| C1 | -0.976247000 | -1.372705000 | -0.082973000 |

MP2 / aug-cc-PVTZ (C,H), DGDZVP (Cl)

|    |              |              |              |
|----|--------------|--------------|--------------|
| C  | 0.000000000  | 0.000000000  | 0.451162000  |
| H  | -0.000001000 | 0.000000000  | 1.529138000  |
| C1 | 1.668911000  | 0.025837000  | -0.083061000 |
| C1 | -0.856831000 | 1.432400000  | -0.083061000 |
| C1 | -0.812080000 | -1.458237000 | -0.083061000 |

MP2 / DGDZVP

|    |              |              |              |
|----|--------------|--------------|--------------|
| C  | 0.000000000  | 0.000000000  | 0.456450000  |
| H  | 0.000000000  | 0.000000000  | 1.548449000  |
| C1 | 0.452184000  | 1.627506000  | -0.084062000 |
| C1 | -1.635554000 | -0.422151000 | -0.084062000 |
| C1 | 1.183371000  | -1.205355000 | -0.084062000 |

MP2 / 6-311++G\*\*

|    |              |              |              |
|----|--------------|--------------|--------------|
| C  | 0.000001000  | 0.000000000  | 0.451146000  |
| H  | -0.000002000 | 0.000000000  | 1.536853000  |
| C1 | 1.675439000  | -0.155748000 | -0.083210000 |
| C1 | -0.702838000 | 1.528844000  | -0.083210000 |
| C1 | -0.972601000 | -1.373096000 | -0.083210000 |

MP2 / aug-cc-PVTZ

|    |              |             |              |
|----|--------------|-------------|--------------|
| C  | 0.000001000  | 0.000000000 | 0.459846000  |
| H  | 0.000000000  | 0.000000000 | 1.542171000  |
| C1 | 1.652687000  | 0.275683000 | -0.084338000 |
| C1 | -1.065093000 | 1.293426000 | -0.084338000 |

|    |              |              |              |
|----|--------------|--------------|--------------|
| C1 | -0.587595000 | -1.569109000 | -0.084338000 |
|----|--------------|--------------|--------------|

#### 4. CHBr<sub>3</sub>

##### B3LYP / 6-311++G\*\* (C,H), DGDZVP (Br)

|    |              |              |              |
|----|--------------|--------------|--------------|
| C  | 0.000023000  | -0.000009000 | 0.522387000  |
| H  | 0.000000000  | -0.000006000 | 1.602850000  |
| Br | -1.846333000 | -0.279805000 | -0.046896000 |
| Br | 1.165474000  | -1.459089000 | -0.046874000 |
| Br | 0.680821000  | 1.738906000  | -0.046884000 |

##### B3LYP / aug-cc-PVTZ (C,H), DGDZVP (Br)

|    |              |              |              |
|----|--------------|--------------|--------------|
| C  | 0.000027000  | -0.000007000 | 0.522230000  |
| H  | 0.000000000  | -0.000015000 | 1.599007000  |
| Br | 0.306197000  | 1.837624000  | -0.045548000 |
| Br | -1.744565000 | -0.653621000 | -0.045568000 |
| Br | 1.438332000  | -1.184011000 | -0.045548000 |

##### B3LYP / DGDZVP

|    |              |              |              |
|----|--------------|--------------|--------------|
| C  | 0.000036000  | 0.000010000  | 0.522512000  |
| H  | 0.000005000  | -0.000002000 | 1.605872000  |
| Br | 1.868258000  | 0.044584000  | -0.047934000 |
| Br | -0.972733000 | 1.595667000  | -0.047936000 |
| Br | -0.895540000 | -1.640249000 | -0.047930000 |

##### B3LYP / 6-311++G\*\*

|    |              |              |              |
|----|--------------|--------------|--------------|
| C  | 0.000010000  | 0.000015000  | 0.519196000  |
| H  | -0.000002000 | 0.000004000  | 1.600132000  |
| Br | 0.331020000  | 1.837591000  | -0.044916000 |
| Br | -1.756912000 | -0.632126000 | -0.044913000 |
| Br | 1.425881000  | -1.205474000 | -0.044914000 |

##### B3LYP / aug-cc-PVTZ

|    |              |             |              |
|----|--------------|-------------|--------------|
| C  | -0.000055000 | 0.000024000 | 0.521421000  |
| H  | -0.000017000 | 0.000003000 | 1.599775000  |
| Br | 1.258347000  | 1.368242000 | -0.045539000 |
| Br | -1.814135000 | 0.405563000 | -0.045520000 |

|    |             |              |              |
|----|-------------|--------------|--------------|
| Br | 0.555848000 | -1.773828000 | -0.045549000 |
|----|-------------|--------------|--------------|

**PBE0/ 6-311++G\*\* (C,H), DGDZVP (Br)**

|   |              |             |             |
|---|--------------|-------------|-------------|
| C | -0.000052000 | 0.000325000 | 0.518357000 |
|---|--------------|-------------|-------------|

|   |              |             |             |
|---|--------------|-------------|-------------|
| H | -0.000008000 | 0.000604000 | 1.601480000 |
|---|--------------|-------------|-------------|

|    |             |              |              |
|----|-------------|--------------|--------------|
| Br | 0.429994000 | -1.794502000 | -0.046438000 |
|----|-------------|--------------|--------------|

|    |             |             |              |
|----|-------------|-------------|--------------|
| Br | 1.339261000 | 1.269925000 | -0.047229000 |
|----|-------------|-------------|--------------|

|    |              |             |              |
|----|--------------|-------------|--------------|
| Br | -1.769278000 | 0.525156000 | -0.047010000 |
|----|--------------|-------------|--------------|

**PBE0/ aug-cc-PVTZ (C,H), DGDZVP (Br)**

|   |             |             |             |
|---|-------------|-------------|-------------|
| C | 0.000029000 | 0.000016000 | 0.519075000 |
|---|-------------|-------------|-------------|

|   |             |             |             |
|---|-------------|-------------|-------------|
| H | 0.000042000 | 0.000001000 | 1.599257000 |
|---|-------------|-------------|-------------|

|    |              |             |              |
|----|--------------|-------------|--------------|
| Br | -0.545681000 | 1.758324000 | -0.046434000 |
|----|--------------|-------------|--------------|

|    |              |              |              |
|----|--------------|--------------|--------------|
| Br | -1.249873000 | -1.351772000 | -0.046425000 |
|----|--------------|--------------|--------------|

|    |             |              |              |
|----|-------------|--------------|--------------|
| Br | 1.795606000 | -0.406573000 | -0.046460000 |
|----|-------------|--------------|--------------|

**PBE0/ DGDZVP**

|   |             |             |             |
|---|-------------|-------------|-------------|
| C | 0.000049000 | 0.000004000 | 0.518989000 |
|---|-------------|-------------|-------------|

|   |             |              |             |
|---|-------------|--------------|-------------|
| H | 0.000021000 | -0.000003000 | 1.603173000 |
|---|-------------|--------------|-------------|

|    |             |              |              |
|----|-------------|--------------|--------------|
| Br | 1.770711000 | -0.524950000 | -0.047722000 |
|----|-------------|--------------|--------------|

|    |              |             |              |
|----|--------------|-------------|--------------|
| Br | -0.430744000 | 1.795930000 | -0.047702000 |
|----|--------------|-------------|--------------|

|    |              |              |              |
|----|--------------|--------------|--------------|
| Br | -1.339975000 | -1.270999000 | -0.047712000 |
|----|--------------|--------------|--------------|

**PBE0/ 6-311++G\*\***

|   |              |             |             |
|---|--------------|-------------|-------------|
| C | -0.000035000 | 0.000012000 | 0.514674000 |
|---|--------------|-------------|-------------|

|   |              |             |             |
|---|--------------|-------------|-------------|
| H | -0.000031000 | 0.000011000 | 1.598314000 |
|---|--------------|-------------|-------------|

|    |              |             |              |
|----|--------------|-------------|--------------|
| Br | -1.845920000 | 0.049627000 | -0.044639000 |
|----|--------------|-------------|--------------|

|    |             |              |              |
|----|-------------|--------------|--------------|
| Br | 0.879966000 | -1.623434000 | -0.044641000 |
|----|-------------|--------------|--------------|

|    |             |             |              |
|----|-------------|-------------|--------------|
| Br | 0.965976000 | 1.573782000 | -0.044619000 |
|----|-------------|-------------|--------------|

**PBE0/ aug-cc-PVTZ**

|   |              |              |             |
|---|--------------|--------------|-------------|
| C | -0.000019000 | -0.000007000 | 0.518183000 |
|---|--------------|--------------|-------------|

|   |              |             |             |
|---|--------------|-------------|-------------|
| H | -0.000007000 | 0.000001000 | 1.599985000 |
|---|--------------|-------------|-------------|

|    |              |              |              |
|----|--------------|--------------|--------------|
| Br | -1.753240000 | -0.552449000 | -0.046356000 |
|----|--------------|--------------|--------------|

|    |             |              |              |
|----|-------------|--------------|--------------|
| Br | 1.355075000 | -1.242105000 | -0.046362000 |
|----|-------------|--------------|--------------|

|                                                   |              |              |              |
|---------------------------------------------------|--------------|--------------|--------------|
| Br                                                | 0.398178000  | 1.794555000  | -0.046354000 |
| <b>B2PLYP-D3 / 6-311++G** (C,H), DGDZVP (Br)</b>  |              |              |              |
| C                                                 | -0.000056000 | -0.000028000 | 0.524231000  |
| H                                                 | -0.000027000 | -0.000010000 | 1.605151000  |
| Br                                                | -1.810988000 | -0.425086000 | -0.045246000 |
| Br                                                | 1.273645000  | -1.355783000 | -0.045242000 |
| Br                                                | 0.537353000  | 1.780874000  | -0.045241000 |
| <b>B2PLYP-D3 / aug-cc-PVTZ (C,H), DGDZVP (Br)</b> |              |              |              |
| C                                                 | 0.000006000  | -0.000001000 | 0.520374000  |
| H                                                 | -0.000001000 | -0.000005000 | 1.601749000  |
| Br                                                | 1.427041000  | -1.189531000 | -0.044991000 |
| Br                                                | 0.316650000  | 1.830612000  | -0.044990000 |
| Br                                                | -1.743693000 | -0.641080000 | -0.044990000 |
| <b>B2PLYP-D3 / DGDZVP</b>                         |              |              |              |
| C                                                 | 0.000024000  | 0.000009000  | 0.524004000  |
| H                                                 | 0.000007000  | 0.000002000  | 1.608144000  |
| Br                                                | 1.862588000  | 0.044441000  | -0.049190000 |
| Br                                                | -0.969782000 | 1.590824000  | -0.049188000 |
| Br                                                | -0.892811000 | -1.635265000 | -0.049186000 |
| <b>B2PLYP-D3 / 6-311++G**</b>                     |              |              |              |
| C                                                 | 0.000006000  | -0.000001000 | 0.520363000  |
| H                                                 | -0.000002000 | 0.000005000  | 1.601739000  |
| Br                                                | 0.796620000  | -1.678343000 | -0.044990000 |
| Br                                                | 1.055189000  | 1.529059000  | -0.044990000 |
| Br                                                | -1.851811000 | 0.149284000  | -0.044989000 |
| <b>B2PLYP-D3 / aug-cc-PVTZ</b>                    |              |              |              |
| C                                                 | -0.000050000 | 0.000067000  | -0.524011000 |
| H                                                 | -0.000120000 | 0.000211000  | -1.602484000 |
| Br                                                | 1.727866000  | 0.653356000  | 0.045160000  |
| Br                                                | -0.298087000 | -1.823038000 | 0.044999000  |

|    |              |             |             |
|----|--------------|-------------|-------------|
| Br | -1.429749000 | 1.169663000 | 0.045471000 |
|----|--------------|-------------|-------------|

M06-2X / 6-311++G\*\* (C,H), DGDZVP (Br)

|   |             |              |             |
|---|-------------|--------------|-------------|
| C | 0.000120000 | -0.000081000 | 0.522522000 |
|---|-------------|--------------|-------------|

|   |             |              |             |
|---|-------------|--------------|-------------|
| H | 0.000284000 | -0.000136000 | 1.603407000 |
|---|-------------|--------------|-------------|

|    |              |             |              |
|----|--------------|-------------|--------------|
| Br | -1.295688000 | 1.309646000 | -0.046374000 |
|----|--------------|-------------|--------------|

|    |              |              |              |
|----|--------------|--------------|--------------|
| Br | -0.486340000 | -1.777003000 | -0.046249000 |
|----|--------------|--------------|--------------|

|    |             |             |              |
|----|-------------|-------------|--------------|
| Br | 1.782082000 | 0.467537000 | -0.046405000 |
|----|-------------|-------------|--------------|

M06-2X / aug-cc-PVTZ (C,H), DGDZVP (Br)

|   |             |              |             |
|---|-------------|--------------|-------------|
| C | 0.000036000 | -0.000032000 | 0.523052000 |
|---|-------------|--------------|-------------|

|   |             |             |             |
|---|-------------|-------------|-------------|
| H | 0.000117000 | 0.000084000 | 1.600552000 |
|---|-------------|-------------|-------------|

|    |              |              |              |
|----|--------------|--------------|--------------|
| Br | -1.305837000 | -1.293045000 | -0.045800000 |
|----|--------------|--------------|--------------|

|    |             |              |              |
|----|-------------|--------------|--------------|
| Br | 1.772762000 | -0.484519000 | -0.045605000 |
|----|-------------|--------------|--------------|

|    |              |             |              |
|----|--------------|-------------|--------------|
| Br | -0.467109000 | 1.777363000 | -0.045621000 |
|----|--------------|-------------|--------------|

M06-2X / DGDZVP

|   |              |             |             |
|---|--------------|-------------|-------------|
| C | -0.000085000 | 0.000002000 | 0.523431000 |
|---|--------------|-------------|-------------|

|   |              |             |             |
|---|--------------|-------------|-------------|
| H | -0.000248000 | 0.000075000 | 1.605809000 |
|---|--------------|-------------|-------------|

|    |             |              |              |
|----|-------------|--------------|--------------|
| Br | 0.492031000 | -1.776365000 | -0.047353000 |
|----|-------------|--------------|--------------|

|    |             |             |              |
|----|-------------|-------------|--------------|
| Br | 1.292373000 | 1.314328000 | -0.047749000 |
|----|-------------|-------------|--------------|

|    |              |             |              |
|----|--------------|-------------|--------------|
| Br | -1.784348000 | 0.462411000 | -0.047739000 |
|----|--------------|-------------|--------------|

M06-2X / 6-311++G\*\*

|   |              |              |             |
|---|--------------|--------------|-------------|
| C | -0.000097000 | -0.000105000 | 0.519701000 |
|---|--------------|--------------|-------------|

|   |              |              |             |
|---|--------------|--------------|-------------|
| H | -0.000076000 | -0.000064000 | 1.601205000 |
|---|--------------|--------------|-------------|

|    |              |              |              |
|----|--------------|--------------|--------------|
| Br | -1.744539000 | -0.606394000 | -0.044830000 |
|----|--------------|--------------|--------------|

|    |             |              |              |
|----|-------------|--------------|--------------|
| Br | 1.397307000 | -1.207419000 | -0.045085000 |
|----|-------------|--------------|--------------|

|    |             |             |              |
|----|-------------|-------------|--------------|
| Br | 0.347550000 | 1.813706000 | -0.044830000 |
|----|-------------|-------------|--------------|

M06-2X / aug-cc-PVTZ

|   |              |              |             |
|---|--------------|--------------|-------------|
| C | -0.000172000 | -0.000071000 | 0.521868000 |
|---|--------------|--------------|-------------|

|   |              |              |             |
|---|--------------|--------------|-------------|
| H | -0.000021000 | -0.000288000 | 1.601138000 |
|---|--------------|--------------|-------------|

|    |             |             |              |
|----|-------------|-------------|--------------|
| Br | 0.722128000 | 1.693332000 | -0.045716000 |
|----|-------------|-------------|--------------|

|    |              |              |              |
|----|--------------|--------------|--------------|
| Br | -1.827813000 | -0.221038000 | -0.045527000 |
|----|--------------|--------------|--------------|

|    |             |              |              |
|----|-------------|--------------|--------------|
| Br | 1.105774000 | -1.471947000 | -0.045404000 |
|----|-------------|--------------|--------------|

$\omega$ B97X-D / 6-311++G\*\* (C,H), DGDZVP (Br)

|   |             |             |             |
|---|-------------|-------------|-------------|
| C | 0.000043000 | 0.000003000 | 0.518856000 |
|---|-------------|-------------|-------------|

|   |             |             |             |
|---|-------------|-------------|-------------|
| H | 0.000003000 | 0.000003000 | 1.601001000 |
|---|-------------|-------------|-------------|

|    |              |             |              |
|----|--------------|-------------|--------------|
| Br | -0.548963000 | 1.767119000 | -0.046566000 |
|----|--------------|-------------|--------------|

|    |              |              |              |
|----|--------------|--------------|--------------|
| Br | -1.255920000 | -1.358941000 | -0.046538000 |
|----|--------------|--------------|--------------|

|    |             |              |              |
|----|-------------|--------------|--------------|
| Br | 1.804857000 | -0.408150000 | -0.046543000 |
|----|-------------|--------------|--------------|

$\omega$ B97X-D / aug-cc-PVTZ (C,H), DGDZVP (Br)

|   |              |             |             |
|---|--------------|-------------|-------------|
| C | -0.000039000 | 0.000029000 | 0.519920000 |
|---|--------------|-------------|-------------|

|   |              |             |             |
|---|--------------|-------------|-------------|
| H | -0.000002000 | 0.000000000 | 1.598310000 |
|---|--------------|-------------|-------------|

|    |              |              |              |
|----|--------------|--------------|--------------|
| Br | -1.787639000 | -0.461247000 | -0.045999000 |
|----|--------------|--------------|--------------|

|    |             |              |              |
|----|-------------|--------------|--------------|
| Br | 1.293247000 | -1.317532000 | -0.046015000 |
|----|-------------|--------------|--------------|

|    |             |             |              |
|----|-------------|-------------|--------------|
| Br | 0.494432000 | 1.778743000 | -0.046001000 |
|----|-------------|-------------|--------------|

$\omega$ B97X-D / DGDZVP

|   |              |             |             |
|---|--------------|-------------|-------------|
| C | -0.000030000 | 0.000010000 | 0.519913000 |
|---|--------------|-------------|-------------|

|   |             |             |             |
|---|-------------|-------------|-------------|
| H | 0.000006000 | 0.000027000 | 1.602796000 |
|---|-------------|-------------|-------------|

|    |             |             |              |
|----|-------------|-------------|--------------|
| Br | 1.831331000 | 0.269054000 | -0.047520000 |
|----|-------------|-------------|--------------|

|    |              |             |              |
|----|--------------|-------------|--------------|
| Br | -1.148676000 | 1.451474000 | -0.047499000 |
|----|--------------|-------------|--------------|

|    |              |              |              |
|----|--------------|--------------|--------------|
| Br | -0.682614000 | -1.720534000 | -0.047502000 |
|----|--------------|--------------|--------------|

$\omega$ B97X-D / 6-311++G\*\*

|   |              |             |             |
|---|--------------|-------------|-------------|
| C | -0.000014000 | 0.000030000 | 0.515805000 |
|---|--------------|-------------|-------------|

|   |             |              |             |
|---|-------------|--------------|-------------|
| H | 0.000007000 | -0.000002000 | 1.598499000 |
|---|-------------|--------------|-------------|

|    |              |             |              |
|----|--------------|-------------|--------------|
| Br | -0.409608000 | 1.803918000 | -0.044697000 |
|----|--------------|-------------|--------------|

|    |              |              |              |
|----|--------------|--------------|--------------|
| Br | -1.357430000 | -1.256715000 | -0.044703000 |
|----|--------------|--------------|--------------|

|    |             |              |              |
|----|-------------|--------------|--------------|
| Br | 1.767050000 | -0.547236000 | -0.044703000 |
|----|-------------|--------------|--------------|

$\omega$ B97X-D / aug-cc-PVTZ

|   |             |             |             |
|---|-------------|-------------|-------------|
| C | 0.000017000 | 0.000001000 | 0.518879000 |
|---|-------------|-------------|-------------|

|   |              |             |             |
|---|--------------|-------------|-------------|
| H | -0.000007000 | 0.000002000 | 1.598818000 |
|---|--------------|-------------|-------------|

|    |              |              |              |
|----|--------------|--------------|--------------|
| Br | -0.127823000 | -1.838293000 | -0.045828000 |
|----|--------------|--------------|--------------|

|    |             |             |              |
|----|-------------|-------------|--------------|
| Br | 1.655891000 | 0.808474000 | -0.045840000 |
|----|-------------|-------------|--------------|



|    |              |             |              |
|----|--------------|-------------|--------------|
| Br | -1.528070000 | 1.029843000 | -0.045841000 |
|----|--------------|-------------|--------------|

MP2 / 6-311++G\*\* (C,H), DGDZVP (Br)

|    |              |              |              |
|----|--------------|--------------|--------------|
| C  | 0.000000000  | 0.000000000  | 0.521004000  |
| H  | -0.000001000 | 0.000000000  | 1.606025000  |
| Br | 0.777557000  | -1.680345000 | -0.045067000 |
| Br | 1.066443000  | 1.513556000  | -0.045067000 |
| Br | -1.844000000 | 0.166789000  | -0.045067000 |

MP2 / aug-cc-PVTZ (C,H), DGDZVP (Br)

|    |              |              |              |
|----|--------------|--------------|--------------|
| C  | 0.000000000  | 0.000000000  | 0.512574000  |
| H  | -0.000001000 | 0.000000000  | 1.589680000  |
| Br | -1.779070000 | 0.424677000  | -0.044430000 |
| Br | 0.521754000  | -1.753058000 | -0.044430000 |
| Br | 1.257316000  | 1.328381000  | -0.044430000 |

MP2 / DGDZVP

|    |              |              |              |
|----|--------------|--------------|--------------|
| C  | 0.000000000  | 0.000000000  | 0.529950000  |
| H  | -0.000001000 | 0.000000000  | 1.620298000  |
| Br | 0.898177000  | -1.626564000 | -0.045714000 |
| Br | 0.959558000  | 1.591126000  | -0.045714000 |
| Br | -1.857735000 | 0.035438000  | -0.045714000 |

MP2 / 6-311++G\*\*

|    |              |              |              |
|----|--------------|--------------|--------------|
| C  | 0.000000000  | 0.000000000  | 0.519297000  |
| H  | -0.000001000 | 0.000000000  | 1.604733000  |
| Br | 0.638839000  | -1.730619000 | -0.044957000 |
| Br | 1.179341000  | 1.418560000  | -0.044957000 |
| Br | -1.818180000 | 0.312059000  | -0.044957000 |

MP2 / aug-cc-PVTZ

|    |              |              |              |
|----|--------------|--------------|--------------|
| C  | 0.000003000  | 0.000004000  | 0.521279000  |
| H  | 0.000012000  | -0.000007000 | 1.602447000  |
| Br | -0.126729000 | -1.822617000 | -0.047863000 |
| Br | 1.641802000  | 0.801575000  | -0.047852000 |

Br      -1.515080000      1.021071000      -0.047822000

## 5. CHI<sub>3</sub>

### B3LYP / 6-311++G\*\* (C,H), DGDZVP (I)

|   |              |              |              |
|---|--------------|--------------|--------------|
| C | 0.000028000  | 0.000053000  | 0.555225000  |
| H | 0.000107000  | 0.000050000  | 1.635764000  |
| I | 2.098030000  | -0.064520000 | -0.030938000 |
| I | -1.104714000 | -1.784746000 | -0.030946000 |
| I | -0.993322000 | 1.849213000  | -0.030924000 |

### B3LYP / aug-cc-PVTZ (C,H), DGDZVP (I)

|   |              |              |              |
|---|--------------|--------------|--------------|
| C | -0.000022000 | -0.000150000 | 0.553624000  |
| H | -0.000038000 | -0.000266000 | 1.630786000  |
| I | -1.027161000 | -1.816779000 | -0.029170000 |
| I | -1.059765000 | 1.797746000  | -0.028801000 |
| I | 2.086706000  | 0.018787000  | -0.028772000 |

### B3LYP / DGDZVP

|   |              |              |              |
|---|--------------|--------------|--------------|
| C | -0.000012000 | 0.000062000  | 0.554171000  |
| H | 0.000018000  | 0.000017000  | 1.637686000  |
| I | -1.873766000 | 0.943568000  | -0.031147000 |
| I | 1.753907000  | 1.150964000  | -0.031287000 |
| I | 0.120010000  | -2.094435000 | -0.031126000 |

### PBE0 / 6-311++G\*\* (C,H), DGDZVP (I)

|   |              |              |              |
|---|--------------|--------------|--------------|
| C | 0.000032000  | -0.000018000 | 0.555035000  |
| H | 0.000066000  | -0.000006000 | 1.638477000  |
| I | -0.997106000 | -1.818065000 | -0.030990000 |
| I | -1.075901000 | 1.772484000  | -0.031026000 |
| I | 2.072928000  | 0.045624000  | -0.030957000 |

### PBE0 / aug-cc-PVTZ (C,H), DGDZVP (I)

|   |              |              |              |
|---|--------------|--------------|--------------|
| C | -0.000009000 | -0.000007000 | 0.554739000  |
| H | -0.000009000 | 0.000019000  | 1.635532000  |
| I | -1.752000000 | -1.085888000 | -0.029961000 |
| I | -0.064441000 | 2.060177000  | -0.029860000 |

|   |             |              |              |
|---|-------------|--------------|--------------|
| I | 1.816422000 | -0.974409000 | -0.029938000 |
|---|-------------|--------------|--------------|

**PBE0 / DGDZVP**

|   |              |              |              |
|---|--------------|--------------|--------------|
| C | -0.000001000 | 0.000008000  | 0.554790000  |
| H | -0.000030000 | -0.000034000 | 1.639470000  |
| I | 1.830448000  | 0.973475000  | -0.031244000 |
| I | -0.072358000 | -2.071858000 | -0.031228000 |
| I | -1.758200000 | 1.098464000  | -0.031342000 |

**B2PLYP-D3 / 6-311++G\*\* (C,H), DGDZVP (I)**

|   |              |              |              |
|---|--------------|--------------|--------------|
| C | -0.000028000 | 0.000043000  | 0.559916000  |
| H | 0.000025000  | 0.000066000  | 1.641436000  |
| I | 2.085689000  | -0.176960000 | -0.029941000 |
| I | -1.196019000 | -1.717729000 | -0.029901000 |
| I | -0.889610000 | 1.894721000  | -0.029943000 |

**B2PLYP-D3 / aug-cc-PVTZ (C,H), DGDZVP (I)**

|   |              |              |              |
|---|--------------|--------------|--------------|
| C | -0.000067000 | 0.000200000  | 0.557304000  |
| H | -0.000125000 | 0.000230000  | 1.634546000  |
| I | -0.240847000 | -2.057143000 | -0.026591000 |
| I | -1.661293000 | 1.237217000  | -0.026849000 |
| I | 1.901964000  | 0.820225000  | -0.026620000 |

**B2PLYP-D3 / DGDZVP**

|   |              |              |              |
|---|--------------|--------------|--------------|
| C | 0.000004000  | -0.000004000 | 0.560568000  |
| H | 0.000006000  | 0.000009000  | 1.645523000  |
| I | 1.812041000  | -1.049932000 | -0.031520000 |
| I | -1.815279000 | -1.044322000 | -0.031509000 |
| I | 0.003249000  | 2.094162000  | -0.031456000 |

**M06-2X / 6-311++G\*\* (C,H), DGDZVP (I)**

|   |              |              |              |
|---|--------------|--------------|--------------|
| C | 0.000336000  | 0.000027000  | 0.558812000  |
| H | -0.000260000 | 0.000055000  | 1.639965000  |
| I | -1.493908000 | -1.433760000 | -0.031056000 |
| I | -0.494837000 | 2.010992000  | -0.030840000 |

|                                                                  |              |              |              |
|------------------------------------------------------------------|--------------|--------------|--------------|
| I                                                                | 1.988472000  | -0.577358000 | -0.031006000 |
| <b>M06-2X / aug-cc-PVTZ (C,H), DGDZVP (I)</b>                    |              |              |              |
| C                                                                | 0.000399000  | 0.000439000  | 0.557961000  |
| H                                                                | -0.000168000 | -0.000056000 | 1.636088000  |
| I                                                                | 1.987046000  | -0.535077000 | -0.029070000 |
| I                                                                | -1.456468000 | -1.453537000 | -0.029383000 |
| I                                                                | -0.531144000 | 1.988157000  | -0.029165000 |
| <b>M06-2X / DGDZVP</b>                                           |              |              |              |
| C                                                                | -0.000277000 | -0.000154000 | 0.557939000  |
| H                                                                | -0.000529000 | 0.000107000  | 1.640889000  |
| I                                                                | 0.047555000  | -2.069460000 | -0.031017000 |
| I                                                                | -1.815913000 | 0.994534000  | -0.030903000 |
| I                                                                | 1.768738000  | 1.075017000  | -0.031022000 |
| <b><math>\omega</math>B97X-D / 6-311++G** (C,H), DGDZVP (I)</b>  |              |              |              |
| C                                                                | 0.000057000  | -0.000018000 | 0.551580000  |
| H                                                                | 0.000072000  | -0.000090000 | 1.635190000  |
| I                                                                | 2.034921000  | -0.419865000 | -0.031101000 |
| I                                                                | -1.381113000 | -1.552200000 | -0.031098000 |
| I                                                                | -0.653816000 | 1.972069000  | -0.031097000 |
| <b><math>\omega</math>B97X-D / aug-cc-PVTZ (C,H), DGDZVP (I)</b> |              |              |              |
| C                                                                | -0.000019000 | -0.000015000 | 0.552095000  |
| H                                                                | 0.000021000  | -0.000091000 | 1.631130000  |
| I                                                                | 0.572961000  | 1.985842000  | -0.029770000 |
| I                                                                | 1.433551000  | -1.489077000 | -0.029905000 |
| I                                                                | -2.006300000 | -0.497008000 | -0.029754000 |
| <b><math>\omega</math>B97X-D / DGDZVP</b>                        |              |              |              |
| C                                                                | 0.000032000  | 0.000010000  | 0.551602000  |
| H                                                                | 0.000032000  | 0.000078000  | 1.635212000  |
| I                                                                | 2.035669000  | 0.416107000  | -0.031054000 |
| I                                                                | -0.657467000 | -1.970860000 | -0.031101000 |

|   |              |             |              |
|---|--------------|-------------|--------------|
| I | -1.378268000 | 1.554728000 | -0.031086000 |
|---|--------------|-------------|--------------|

MP2 / 6-311++G\*\* (C,H), DGDZVP (I)

|   |             |             |             |
|---|-------------|-------------|-------------|
| C | 0.000000000 | 0.000000000 | 0.555117000 |
|---|-------------|-------------|-------------|

|   |             |             |             |
|---|-------------|-------------|-------------|
| H | 0.000000000 | 0.000001000 | 1.641458000 |
|---|-------------|-------------|-------------|

|   |              |              |              |
|---|--------------|--------------|--------------|
| I | -0.033913000 | -2.087064000 | -0.031271000 |
|---|--------------|--------------|--------------|

|   |              |             |              |
|---|--------------|-------------|--------------|
| I | -1.790495000 | 1.072902000 | -0.031271000 |
|---|--------------|-------------|--------------|

|   |             |             |              |
|---|-------------|-------------|--------------|
| I | 1.824408000 | 1.014163000 | -0.031271000 |
|---|-------------|-------------|--------------|

MP2 / aug-cc-PVTZ (C,H), DGDZVP (I)

|   |             |             |             |
|---|-------------|-------------|-------------|
| C | 0.000000000 | 0.000000000 | 0.543966000 |
|---|-------------|-------------|-------------|

|   |             |             |             |
|---|-------------|-------------|-------------|
| H | 0.000001000 | 0.000000000 | 1.623141000 |
|---|-------------|-------------|-------------|

|   |              |              |              |
|---|--------------|--------------|--------------|
| I | -1.870264000 | -0.827983000 | -0.030735000 |
|---|--------------|--------------|--------------|

|   |             |             |              |
|---|-------------|-------------|--------------|
| I | 0.218077000 | 2.033687000 | -0.030735000 |
|---|-------------|-------------|--------------|

|   |             |              |              |
|---|-------------|--------------|--------------|
| I | 1.652187000 | -1.205704000 | -0.030735000 |
|---|-------------|--------------|--------------|

MP2 / DGDZVP

|   |             |             |             |
|---|-------------|-------------|-------------|
| C | 0.000000000 | 0.000001000 | 0.564438000 |
|---|-------------|-------------|-------------|

|   |             |             |             |
|---|-------------|-------------|-------------|
| H | 0.000001000 | 0.000001000 | 1.656622000 |
|---|-------------|-------------|-------------|

|   |              |              |              |
|---|--------------|--------------|--------------|
| I | -0.334652000 | -2.066216000 | -0.031719000 |
|---|--------------|--------------|--------------|

|   |              |             |              |
|---|--------------|-------------|--------------|
| I | -1.622071000 | 1.322925000 | -0.031719000 |
|---|--------------|-------------|--------------|

|   |             |             |              |
|---|-------------|-------------|--------------|
| I | 1.956723000 | 0.743291000 | -0.031719000 |
|---|-------------|-------------|--------------|

## SI.1.3 Regressions

### 1. Pyridine

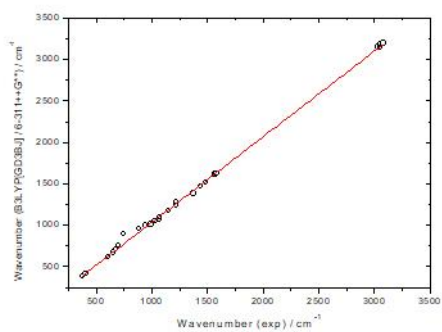

B3LYP / 6-311++G\*\*

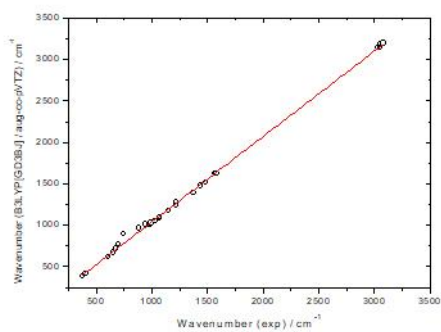

B3LYP / aug-cc-PVTZ

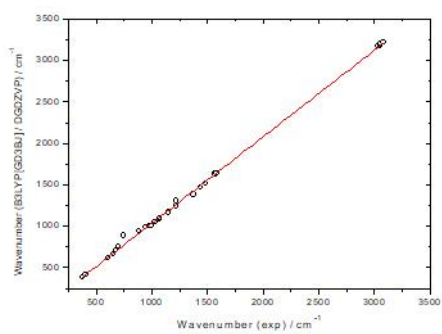

B3LYP / DGDZVP

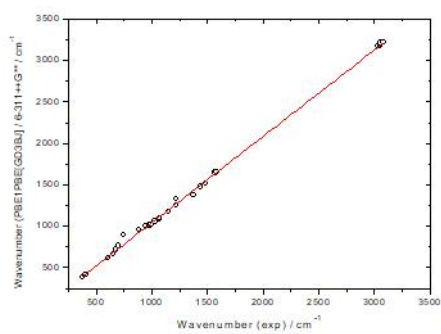

PBE0 / 6-311++G\*\*

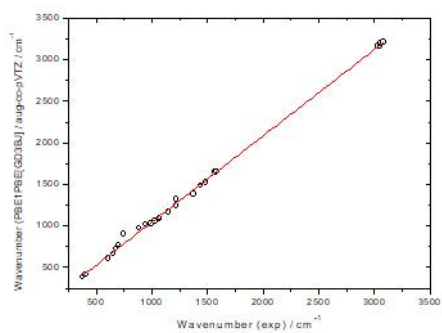

PBE0 / aug-cc-PVTZ

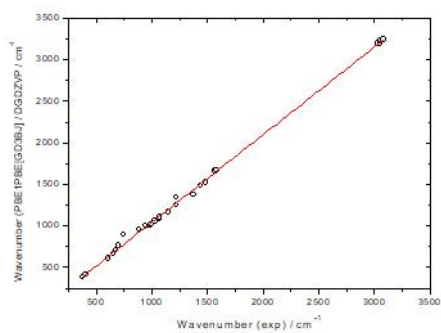

PBE0 / DGDZVP

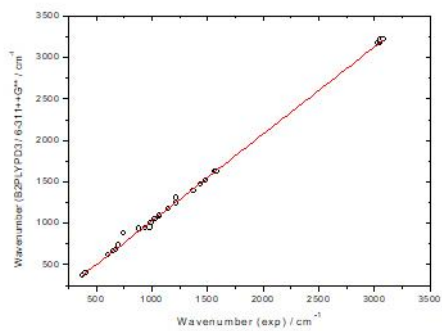

B2PLYP-D3 / 6-311++G\*\*

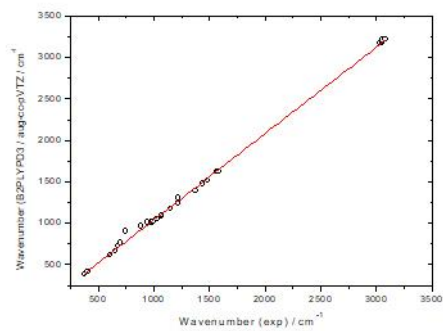

B2PLYP-D3 / aug-cc-pVTZ

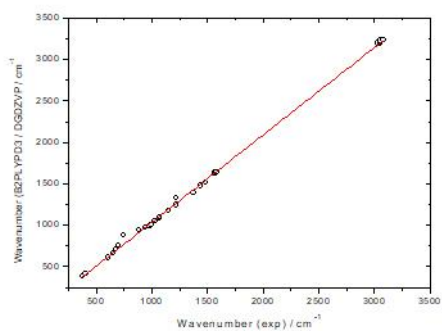

B2PLYP-D3 / DGDZVP

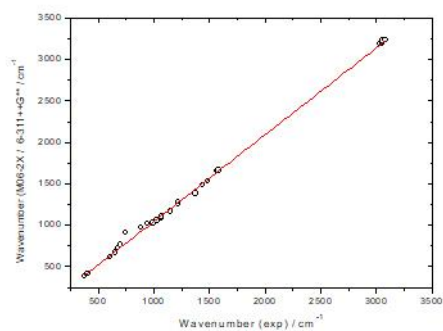

M06-2X / 6-311++G\*\*

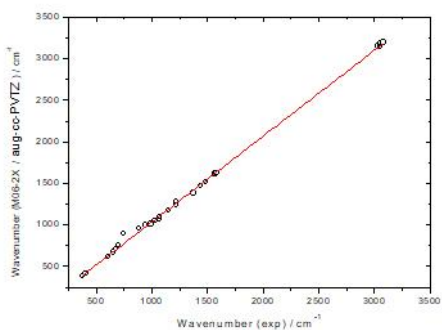

M06-2X / aug-cc-pVTZ

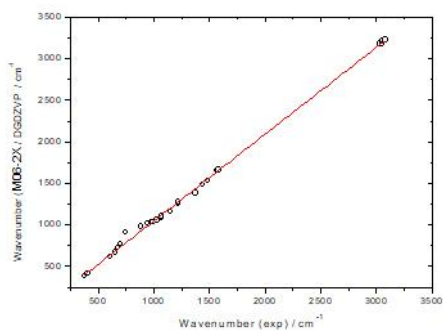

M06-2X / DGDZVP

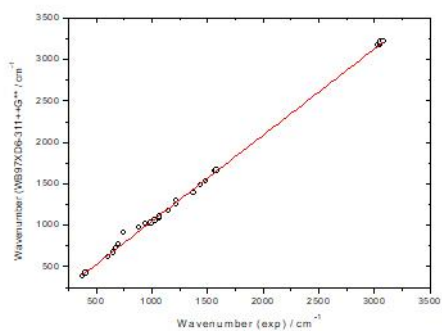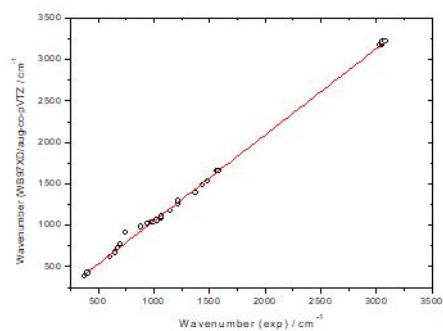



$\omega$ B97X-D / 6-311++G\*\*

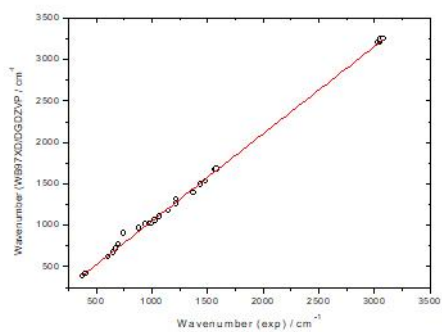

$\omega$ B97X-D / aug-cc-PVTZ

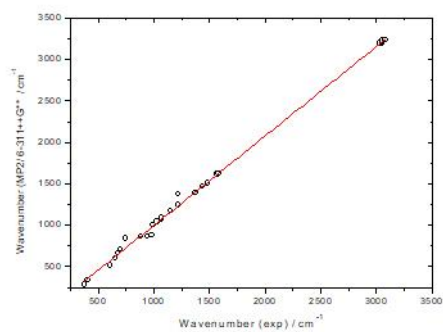

$\omega$ B97X-D / DGDZVP

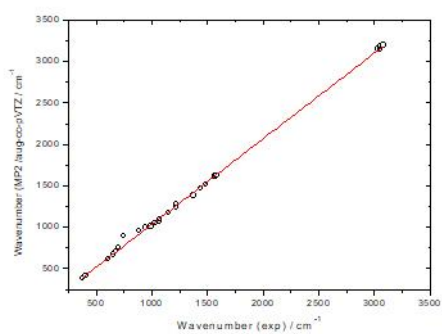

MP2 / 6-311++G\*\*

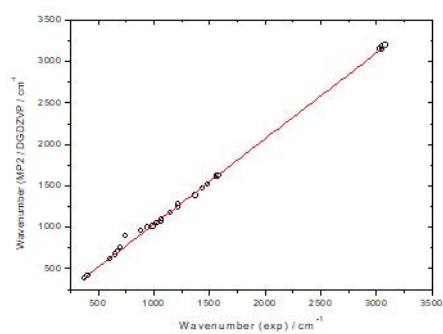

MP2 / aug-cc-PVTZ

MP2 / DGDZVP

**Figure SI.1. 6** Linear Regression of Computed vs. Experimental Infrared Wavenumbers of Pyridine.

**Table SI.1.6** Statistical Parameters of Linear Regression of Computed vs. Experimental Infrared Wavenumbers of Pyridine.

| Method          | Basis Sets  | No. | adj- $R^2$  | Slope   | Error   | Intercept | Error    |
|-----------------|-------------|-----|-------------|---------|---------|-----------|----------|
| B3LYP           | 6-311++G**  | 11  | 0.998921218 | 1.03369 | 0.00679 | 3.36926   | 11.06941 |
|                 | aug-cc-PVTZ | 12  | 0.998798219 | 1.03146 | 0.00716 | 10.5898   | 11.65892 |
|                 | DGDZVP      | 13  | 0.998877266 | 1.04464 | 0.007   | -7.17633  | 11.41251 |
| PBE0            | 6-311++G**  | 21  | 0.998689750 | 1.04271 | 0.00755 | 1.78763   | 12.30718 |
|                 | aug-cc-PVTZ | 22  | 0.998597874 | 1.03884 | 0.00779 | 8.07573   | 12.68472 |
|                 | DGDZVP      | 23  | 0.998666430 | 1.05462 | 0.00771 | -8.33241  | 12.55823 |
| B2PLYP-D3       | 6-311++G**  | 31  | 0.998720018 | 1.05142 | 0.00693 | -23.5015  | 11.29913 |
|                 | aug-cc-PVTZ | 32  | 0.998630910 | 1.04197 | 0.00772 | 1.00022   | 12.5719  |
|                 | DGDZVP      | 33  | 0.998845157 | 1.0553  | 0.00718 | -18.1441  | 11.69289 |
| M06-2X          | 6-311++G**  | 41  | 0.998656287 | 1.04769 | 0.00769 | -0.77957  | 12.52306 |
|                 | aug-cc-PVTZ | 42  | 0.998562905 | 1.04769 | 0.00769 | -0.77957  | 12.52306 |
|                 | DGDZVP      | 43  | 0.998668233 | 1.04492 | 0.00793 | 4.59257   | 12.91729 |
| $\omega$ B97X-D | 6-311++G**  | 51  | 0.998756153 | 1.04034 | 0.00734 | 9.08554   | 11.96363 |
|                 | aug-cc-PVTZ | 52  | 0.998676604 | 1.03991 | 0.00757 | 12.84679  | 12.33563 |
|                 | DGDZVP      | 53  | 0.998775162 | 1.0545  | 0.00739 | -2.62665  | 12.03333 |
| MP2             | 6-311++G**  | 61  | 0.997563863 | 1.08003 | 0.01067 | -80.7441  | 17.39199 |
|                 | aug-cc-PVTZ | 62  | 0.998054366 | 1.03369 | 0.00679 | 3.36926   | 11.06941 |
|                 | DGDZVP      | 63  | 0.998289840 | 1.03369 | 0.00679 | 3.36926   | 11.06941 |

## 2. CHF<sub>3</sub>

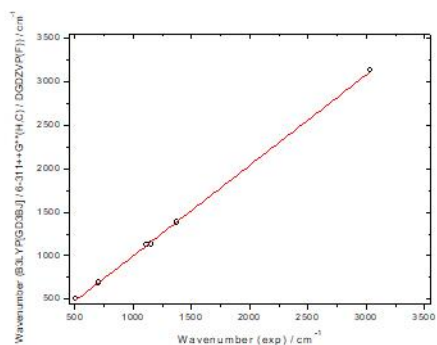

B3LYP / 6-311++G\*\* (C,H), DGDZVP (F)

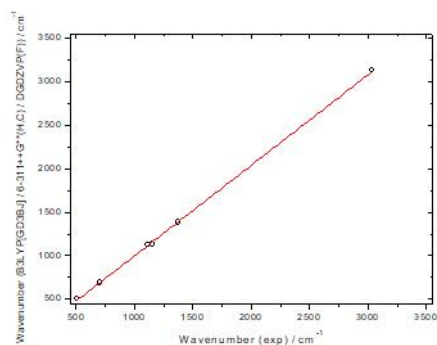

B3LYP / aug-cc-PVTZ (C,H), DGDZVP (F)

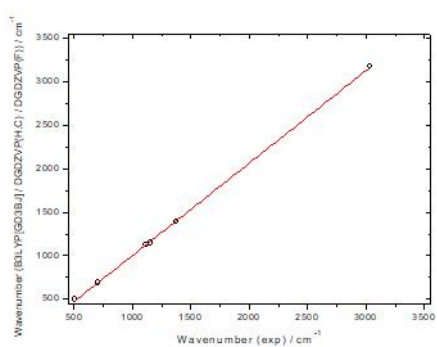

B3LYP / DGDZVP

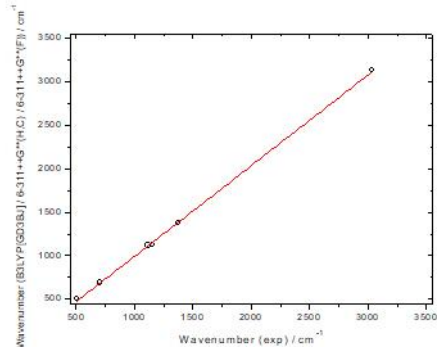

B3LYP / 6-311++G\*\*

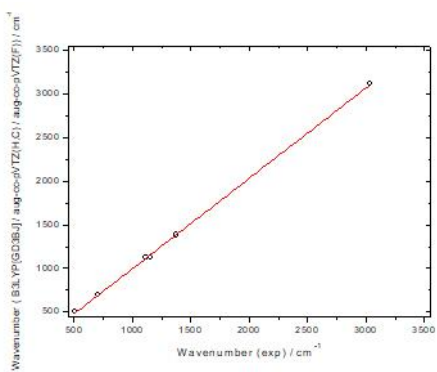

B3LYP / aug-cc-PVTZ

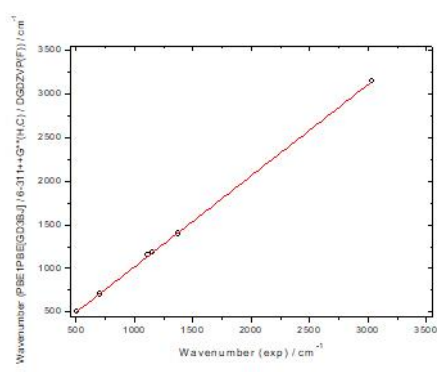

PBE0 / 6-311++G\*\* (C,H), DGDZVP (F)

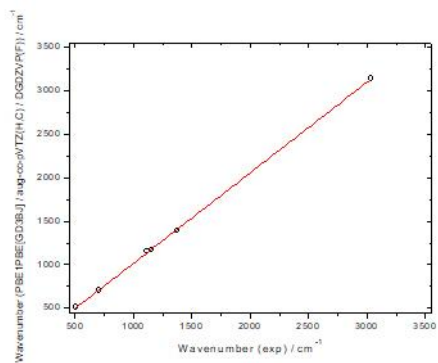

PBE0 / aug-cc-PVTZ (C,H), DGDZVP (F)

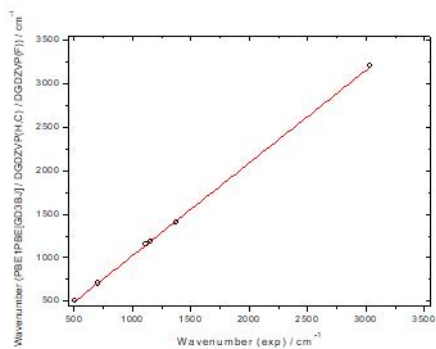

PBE0 / DGDZVP

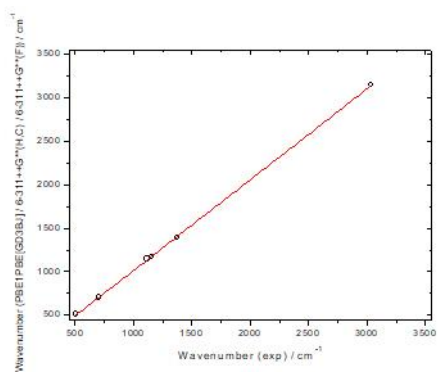

PBE0 / 6-311++G\*\*

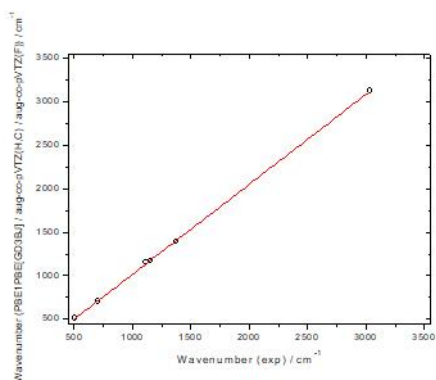

PBE0 / aug-cc-PVTZ

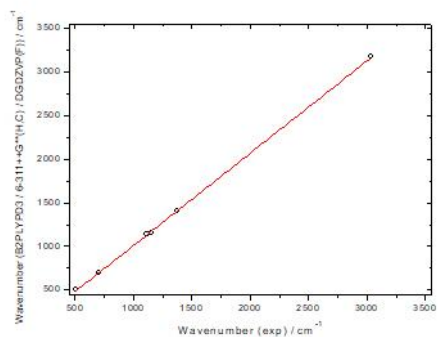

B2PLYP-D3 / 6-311++G\*\* (C,H), DGDZVP (F)

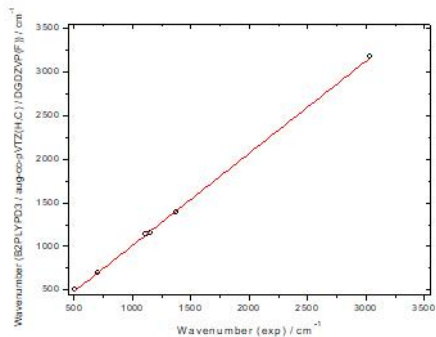

B2PLYP-D3 / aug-cc-PVTZ (C,H), DGDZVP (F)

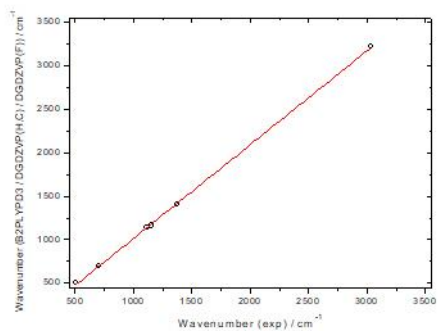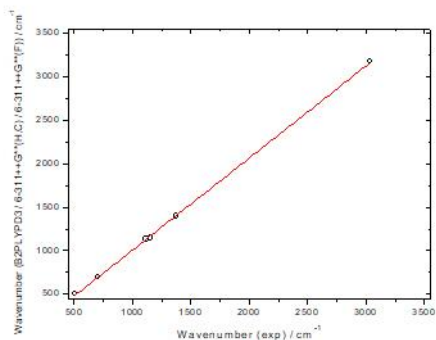

B2PLYP-D3 / DGDZVP

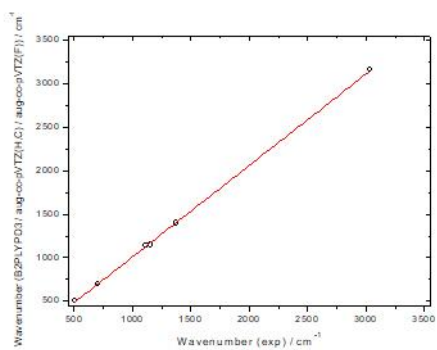

B2PLYP-D3 / 6-311++G\*\*

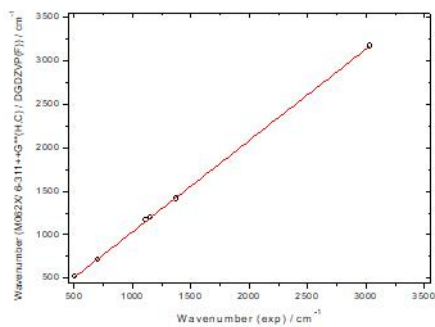

B2PLYP-D3 / aug-cc-PVTZ

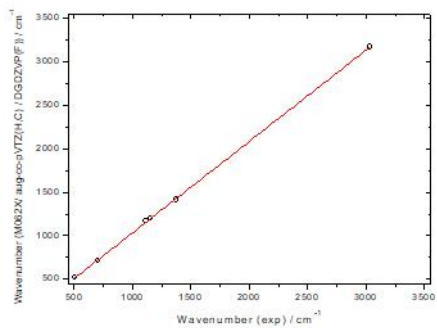

M06-2X / 6-311++G\*\* (C,H), DGDZVP (F)

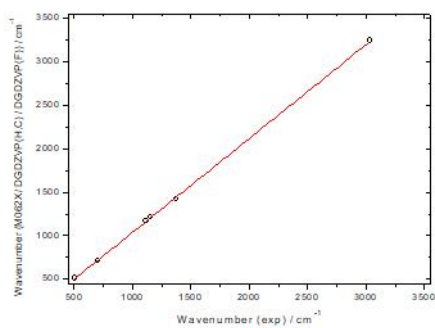

M06-2X / aug-cc-PVTZ (C,H), DGDZVP (F)

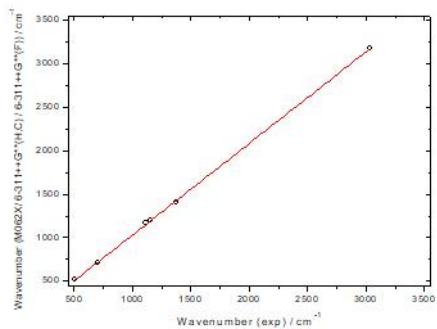

M06-2X / DGDZVP

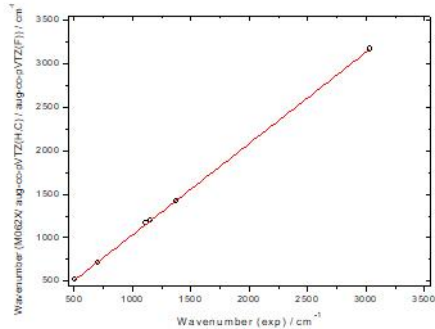

M06-2X / 6-311++G\*\*

M06-2X / aug-cc-PVTZ

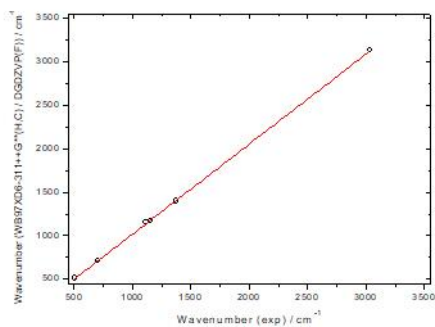

$\omega$ B97X-D / 6-311++G\*\* (C,H), DGDZVP (F)

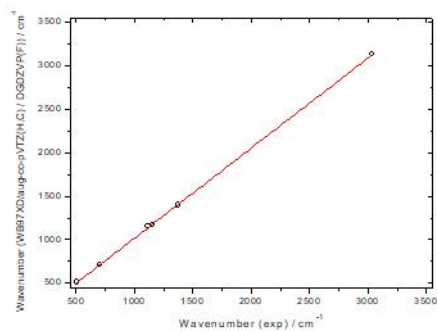

$\omega$ B97X-D / aug-cc-PVTZ (C,H), DGDZVP (F)

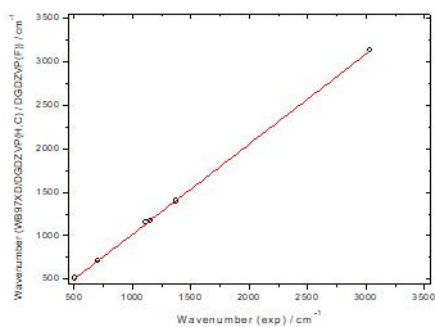

$\omega$ B97X-D / DGDZVP

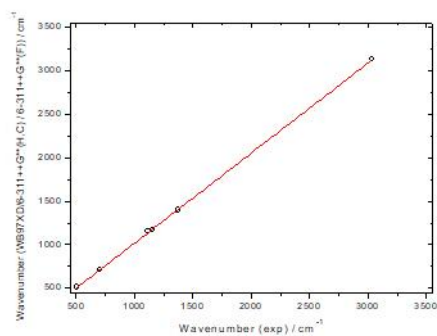

$\omega$ B97X-D / 6-311++G\*\*

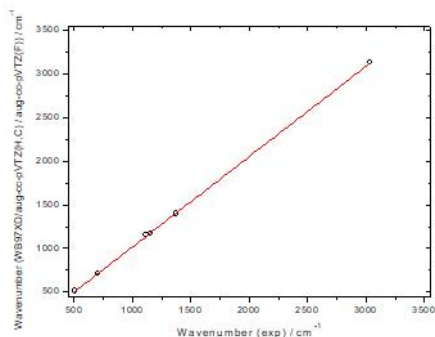

$\omega$ B97X-D / aug-cc-PVTZ

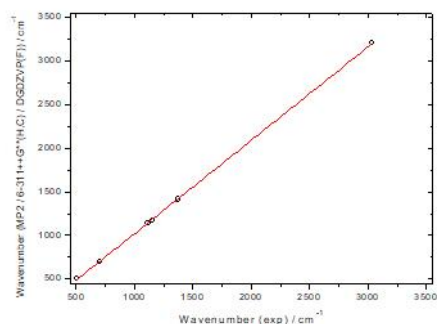

MP2 / 6-311++G\*\* (C,H), DGDZVP (F)

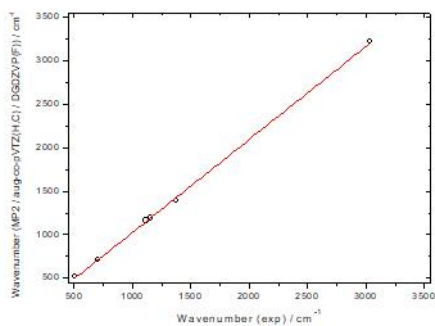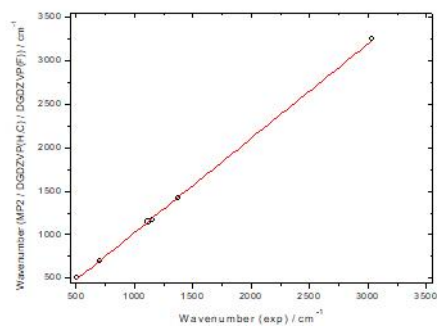

MP2 / aug-cc-PVTZ (C,H), DGDZVP (F)

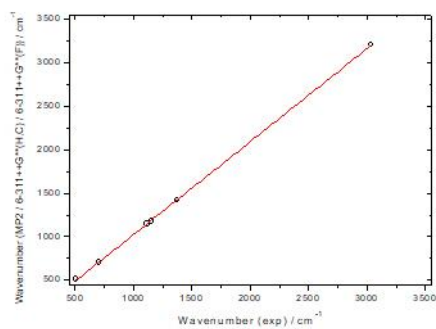

MP2 / 6-311++G\*\*

MP2 / DGDZVP

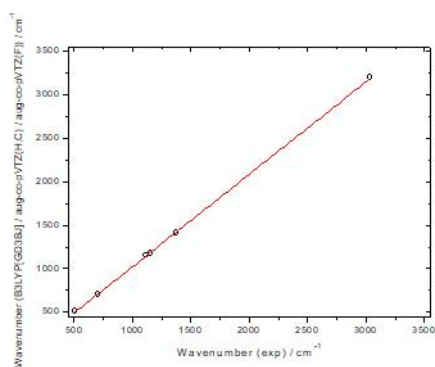

MP2 / aug-cc-PVTZ

**Figure SI.1.7** Linear Regression of Computed vs. Experimental Infrared Wavenumbers of Fluoroform.

**Table SI.1.7** Statistical Parameters of Linear Regression of Computed vs. Experimental Infrared Wavenumbers of Fluoroform.

| Method          | Basis Sets                      | No. | adj- $R^2$  | Slope   | Error   | Intercept | Error    |
|-----------------|---------------------------------|-----|-------------|---------|---------|-----------|----------|
| B3LYP           | 6-311++G** (C,H)<br>DGDZVP (F)  | 11  | 0.999755939 | 1.04377 | 0.00616 | -44.7571  | 8.68998  |
|                 | aug-cc-PVTZ (C,H)<br>DGDZVP (F) | 12  | 0.999585455 | 1.04343 | 0.00803 | -45.007   | 11.32268 |
|                 | DGDZVP                          | 13  | 0.999708804 | 1.06394 | 0.00686 | -60.9988  | 9.67577  |
|                 | 6-311++G**                      | 14* | 0.999431677 | 1.04403 | 0.00941 | -50.3839  | 13.26614 |
|                 | aug-cc-PVTZ                     | 15* | 0.999616151 | 1.03729 | 0.00768 | -39.6023  | 10.83115 |
| PBE0            | 6-311++G** (C,H)<br>DGDZVP (F)  | 21  | 0.999901421 | 1.04512 | 0.00392 | -25.5601  | 5.52957  |
|                 | aug-cc-PVTZ (C,H)<br>DGDZVP (F) | 22  | 0.999811326 | 1.04151 | 0.00541 | -24.3964  | 7.62384  |
|                 | DGDZVP                          | 23  | 0.999869225 | 1.0673  | 0.00461 | -43.1315  | 6.50413  |
|                 | 6-311++G**                      | 24* | 0.999794353 | 1.04441 | 0.00566 | -29.6868  | 7.98157  |
|                 | aug-cc-PVTZ                     | 25* | 0.999877499 | 1.03531 | 0.00433 | -18.0712  | 6.10631  |
| B2PLYP-D3       | 6-311++G** (C,H)<br>DGDZVP (F)  | 31  | 0.999817756 | 1.0597  | 0.00541 | -48.4619  | 7.62358  |
|                 | aug-cc-PVTZ (C,H)<br>DGDZVP (F) | 32  | 0.999658830 | 1.05814 | 0.00739 | -45.8682  | 10.41636 |
|                 | DGDZVP                          | 33  | 0.999730508 | 1.07968 | 0.0067  | -64.5425  | 9.44578  |
|                 | 6-311++G**                      | 34* | 0.999603083 | 1.05946 | 0.00798 | -51.3397  | 11.24951 |
|                 | aug-cc-PVTZ                     | 35* | 0.999733354 | 1.05249 | 0.0065  | -42.3523  | 9.15917  |
| M06-2X          | 6-311++G** (C,H)<br>DGDZVP (F)  | 41  | 0.999899738 | 1.05128 | 0.00398 | -17.0823  | 5.60945  |
|                 | aug-cc-PVTZ (C,H)<br>DGDZVP (F) | 42  | 0.999899731 | 1.05128 | 0.00398 | -17.083   | 5.60966  |
|                 | DGDZVP                          | 43  | 0.999815799 | 1.08103 | 0.00555 | -42.4298  | 7.81874  |
|                 | 6-311++G**                      | 44* | 0.999847288 | 1.05451 | 0.00493 | -22.8605  | 6.94439  |
|                 | aug-cc-PVTZ                     | 45* | 0.999902666 | 1.05105 | 0.00392 | -17.268   | 5.52574  |
| $\omega$ B97X-D | 6-311++G** (C,H)<br>DGDZVP (F)  | 51  | 0.999911884 | 1.03655 | 0.00368 | -18.222   | 5.18501  |
|                 | aug-cc-PVTZ (C,H)<br>DGDZVP (F) | 52  | 0.999912035 | 1.03656 | 0.00367 | -18.206   | 5.18059  |
|                 | DGDZVP                          | 53  | 0.999912440 | 1.03659 | 0.00367 | -18.2816  | 5.16881  |
|                 | 6-311++G**                      | 54* | 0.999912052 | 1.03656 | 0.00367 | -18.2067  | 5.18007  |
|                 | aug-cc-PVTZ                     | 55* | 0.999912010 | 1.03656 | 0.00368 | -18.2034  | 5.18131  |
| MP2             | 6-311++G** (C,H)<br>DGDZVP (F)  | 61  | 0.999834618 | 1.07147 | 0.00521 | -50.4963  | 7.34298  |
|                 | aug-cc-PVTZ (C,H)<br>DGDZVP (F) | 62  | 0.999267011 | 1.0706  | 0.01096 | -43.5638  | 15.45061 |
|                 | DGDZVP                          | 63  | 0.999761481 | 1.08686 | 0.00635 | -63.1879  | 8.94534  |
|                 | 6-311++G**                      | 64* | 0.999846891 | 1.07038 | 0.00501 | -45.3578  | 7.05802  |
|                 | aug-cc-PVTZ                     | 65* | 0.999867941 | 1.06443 | 0.00462 | -40.993   | 6.51841  |



### 3. CHCl<sub>3</sub>

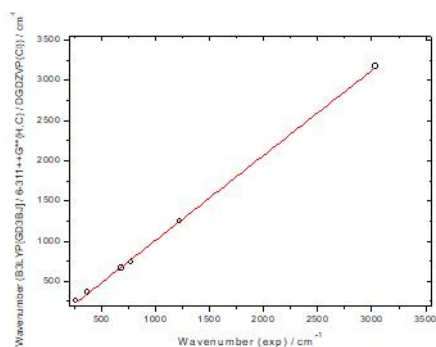

B3LYP / 6-311++G\*\* (C,H), DGDZVP (CI)

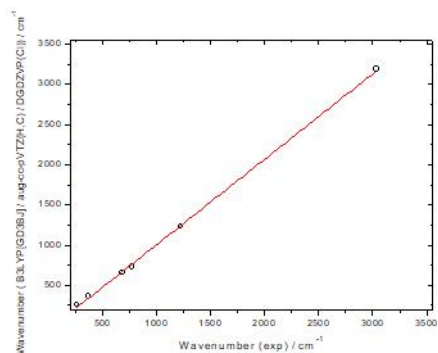

B3LYP / aug-cc-pVTZ (C,H), DGDZVP (CI)

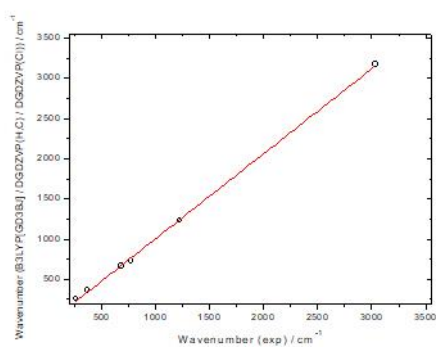

B3LYP / DGDZVP

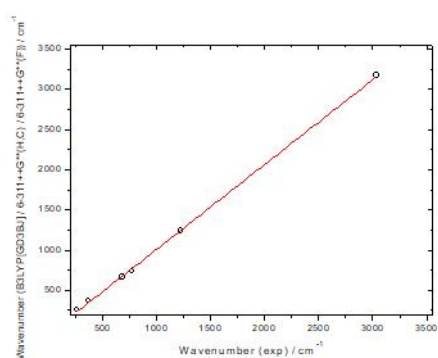

B3LYP / 6-311++G\*\*

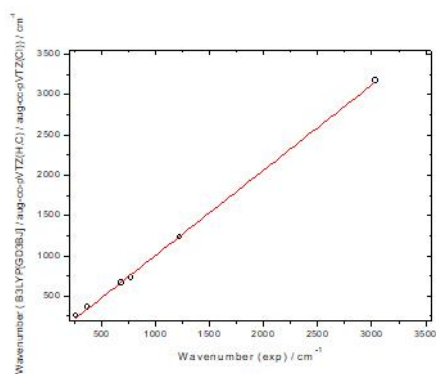

B3LYP / aug-cc-pVTZ

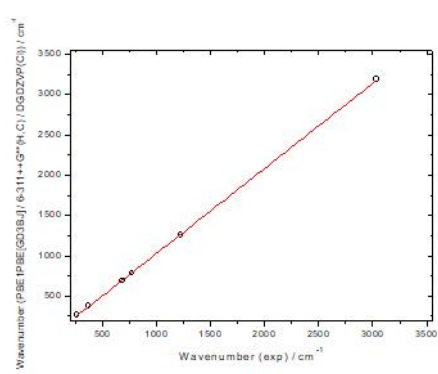

PBE0 / 6-311++G\*\* (C,H), DGDZVP (CI)

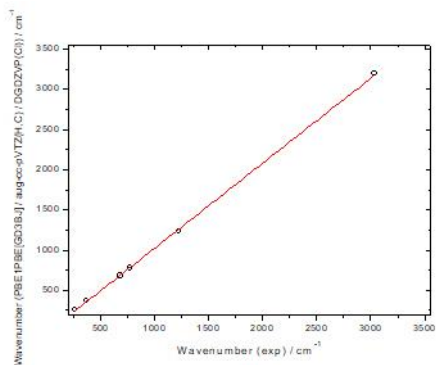

PBE0 / aug-cc-pVTZ (C,H), DGDZVP (CI)

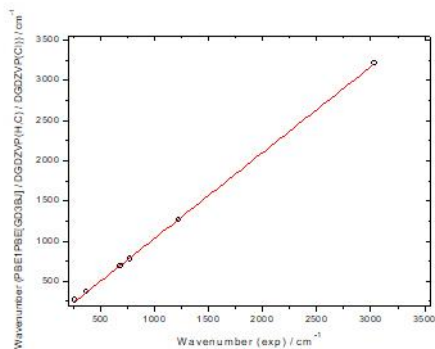

PBE0 / DGDZVP

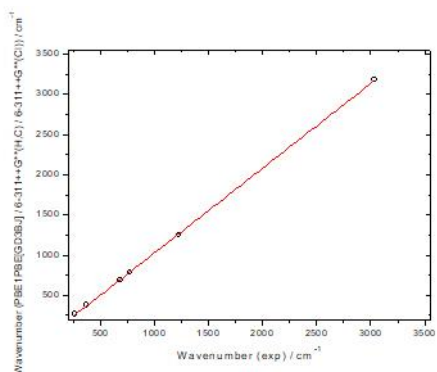

PBE0 / 6-311++G\*\*

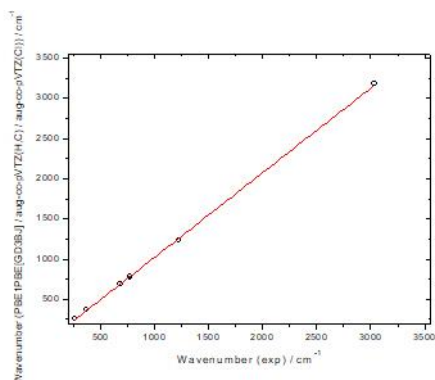

PBE0 / aug-cc-pVTZ

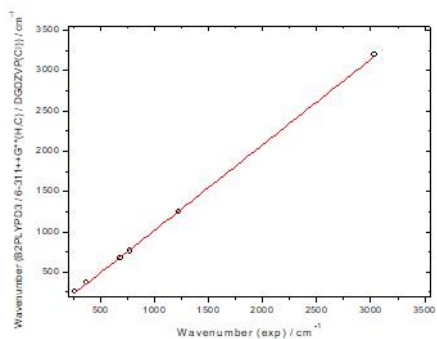

B2PLYP-D3 / 6-311++G\*\* (C,H), DGDZVP (CI)

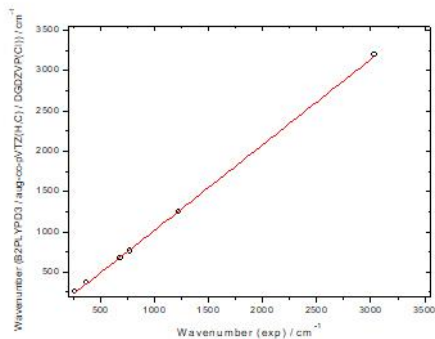

B2PLYP-D3 / aug-cc-pVTZ (C,H), DGDZVP (CI)

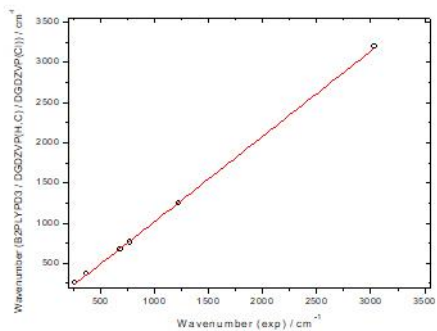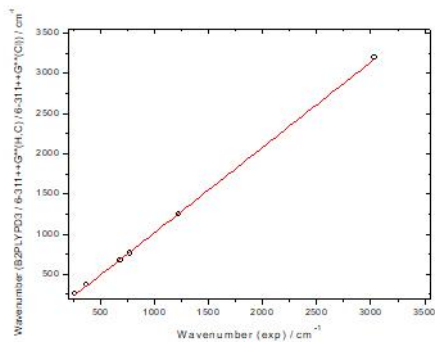

B2PLYP-D3 / DGDZVP

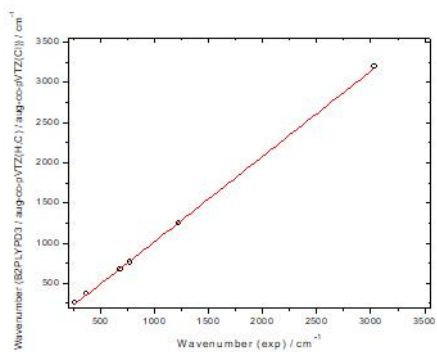

B2PLYP-D3 / 6-311++G\*\*

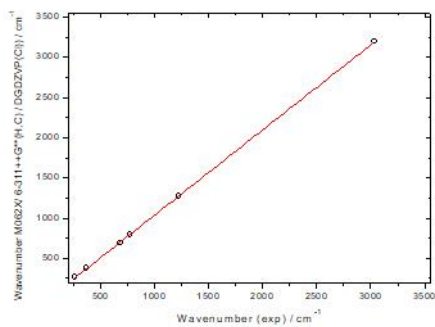

B2PLYP-D3 / aug-cc-PVTZ

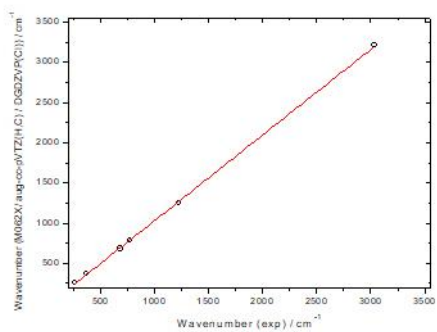

M06-2X / 6-311++G\*\* (C,H), DGDZVP (Cl)

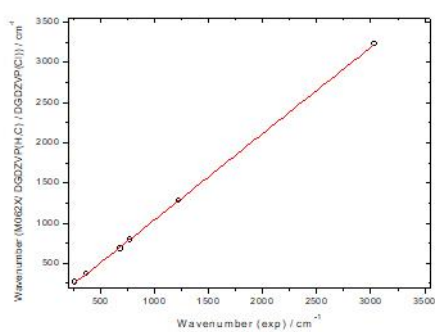

M06-2X / aug-cc-PVTZ (C,H), DGDZVP (Cl)

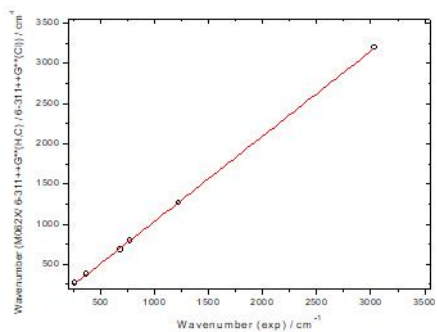

M06-2X / DGDZVP

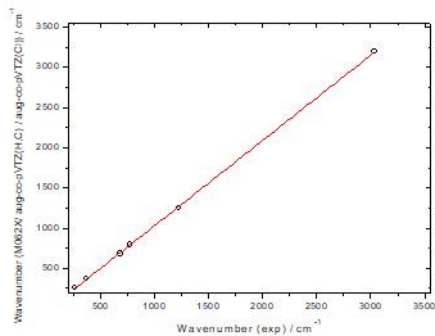

M06-2X / 6-311++G\*\*

M06-2X / aug-cc-PVTZ

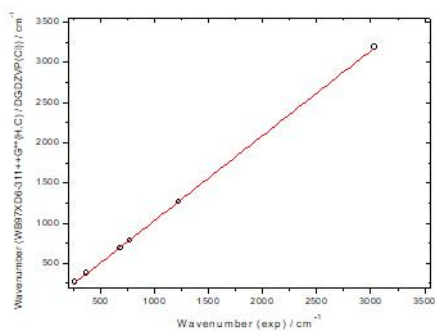

$\omega$ B97X-D / 6-311++G\*\* (C,H), DGDZVP (CI)

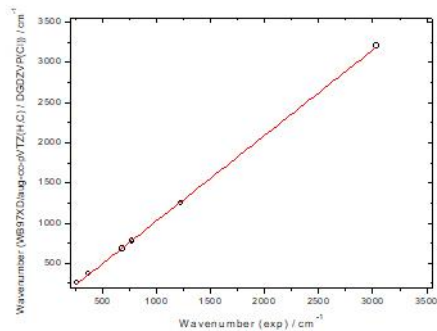

$\omega$ B97X-D / aug-cc-PVTZ (C,H), DGDZVP (CI)

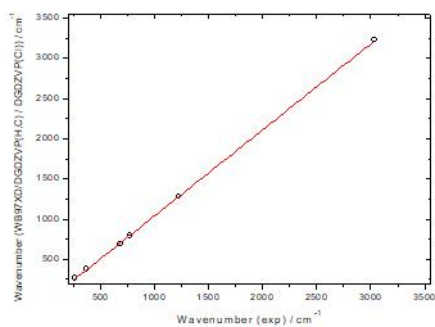

$\omega$ B97X-D / DGDZVP

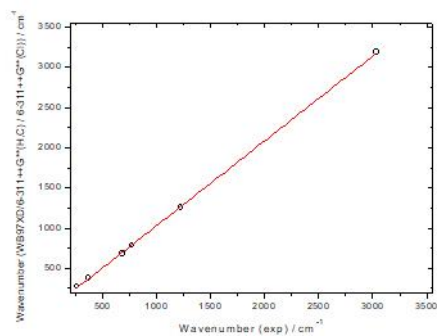

$\omega$ B97X-D / 6-311++G\*\*

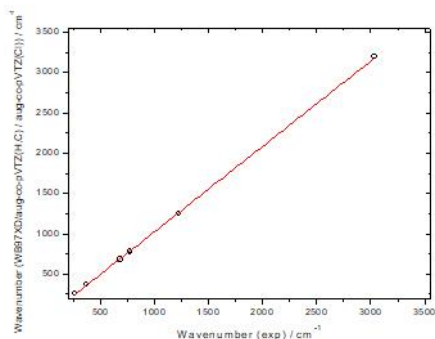

$\omega$ B97X-D / aug-cc-PVTZ

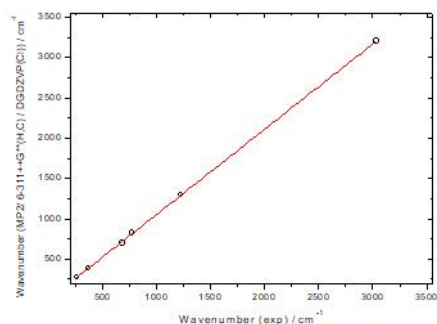

MP2 / 6-311++G\*\* (C,H), DGDZVP (CI)

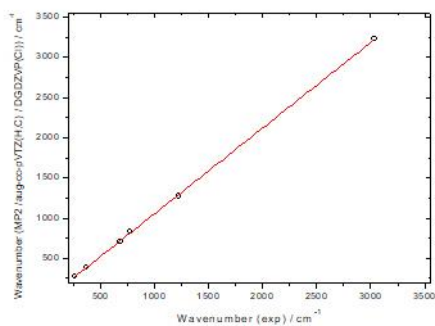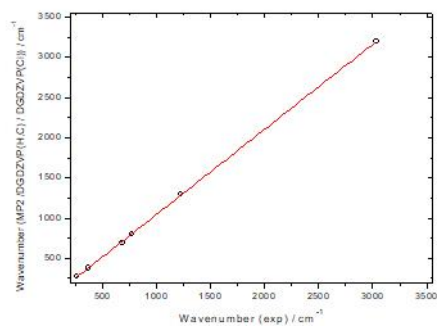

MP2 / aug-cc-PVTZ (C,H), DGDZVP (Cl)

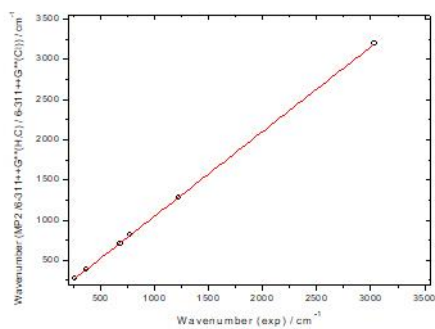

MP2 / 6-311++G\*\*

MP2 / DGDZVP

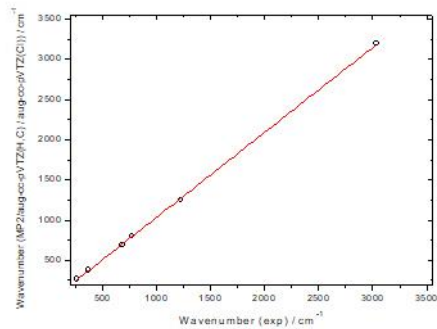

MP2 / aug-cc-PVTZ

**Figure SI.1.8** Linear Regression of Computed vs. Experimental Infrared Wavenumbers of Chloroform.

**Table SI.1.8** Statistical Parameters of Linear Regression of Computed vs. Experimental Infrared Wavenumbers of Chloroform.

| Method          | Basis Sets                       | No. | adj- $R^2$  | Slope   | Error   | Intercept | Error    |
|-----------------|----------------------------------|-----|-------------|---------|---------|-----------|----------|
| B3LYP           | 6-311++G** (C,H)<br>DGDZVP (Cl)  | 11  | 0.999178112 | 1.05563 | 0.01144 | -41.8739  | 14.32841 |
|                 | aug-cc-PVTZ (C,H)<br>DGDZVP (Cl) | 12  | 0.998991650 | 1.06136 | 0.01275 | -51.9403  | 15.95843 |
|                 | DGDZVP                           | 13  | 0.999126433 | 1.05564 | 0.0118  | -46.5469  | 14.77255 |
|                 | 6-311++G**                       | 14* | 0.999136224 | 1.05396 | 0.01171 | -40.6332  | 14.66609 |
|                 | aug-cc-PVTZ                      | 15* | 0.999126504 | 1.05564 | 0.0118  | -46.5464  | 14.77195 |
| PBE0            | 6-311++G** (C,H)<br>DGDZVP (Cl)  | 21  | 0.999810622 | 1.05349 | 0.00548 | -20.2708  | 6.86176  |
|                 | aug-cc-PVTZ (C,H)<br>DGDZVP (Cl) | 22  | 0.999612987 | 1.0567  | 0.00786 | -30.1628  | 9.84009  |
|                 | DGDZVP                           | 23  | 0.999745728 | 1.06535 | 0.00642 | -26.812   | 8.04077  |
|                 | 6-311++G**                       | 24* | 0.999770018 | 1.05193 | 0.00603 | -19.7039  | 7.55067  |
|                 | aug-cc-PVTZ                      | 25* | 0.999708812 | 1.05153 | 0.00678 | -25.7965  | 8.49319  |
| B2PLYP-D3       | 6-311++G** (C,H)<br>DGDZVP (Cl)  | 31  | 0.999593306 | 1.0588  | 0.00807 | -35.6416  | 10.10732 |
|                 | aug-cc-PVTZ (C,H)<br>DGDZVP (Cl) | 32  | 0.999593132 | 1.0588  | 0.00807 | -35.6441  | 10.10948 |
|                 | DGDZVP                           | 33  | 0.999593265 | 1.0588  | 0.00807 | -35.6423  | 10.10782 |
|                 | 6-311++G**                       | 34* | 0.999593229 | 1.0588  | 0.00807 | -35.6438  | 10.10829 |
|                 | aug-cc-PVTZ                      | 35* | 0.999594491 | 1.05878 | 0.00806 | -35.5988  | 10.09247 |
| M06-2X          | 6-311++G** (C,H)<br>DGDZVP (Cl)  | 41  | 0.999887590 | 1.05879 | 0.00424 | -18.5641  | 5.31298  |
|                 | aug-cc-PVTZ (C,H)<br>DGDZVP (Cl) | 42  | 0.999702335 | 1.06432 | 0.00694 | -30.0277  | 8.69167  |
|                 | DGDZVP                           | 43  | 0.999812444 | 1.07145 | 0.00555 | -26.1673  | 6.94511  |
|                 | 6-311++G**                       | 44* | 0.999856319 | 1.05734 | 0.00479 | -18.261   | 5.99857  |
|                 | aug-cc-PVTZ                      | 45* | 0.999794933 | 1.05955 | 0.00574 | -25.888   | 7.18153  |
| $\omega$ B97X-D | 6-311++G** (C,H)<br>DGDZVP (Cl)  | 51  | 0.999871290 | 1.05481 | 0.00452 | -18.3441  | 5.66385  |
|                 | aug-cc-PVTZ (C,H)<br>DGDZVP (Cl) | 52  | 0.999686912 | 1.06223 | 0.00711 | -31.3691  | 8.89651  |
|                 | DGDZVP                           | 53  | 0.999834770 | 1.06846 | 0.00519 | -23.8856  | 6.50041  |
|                 | 6-311++G**                       | 54* | 0.999806936 | 1.0536  | 0.00553 | -19.2503  | 6.92897  |
|                 | aug-cc-PVTZ                      | 55* | 0.999768933 | 1.05734 | 0.00608 | -27.5563  | 7.6074   |
| MP2             | 6-311++G** (C,H)<br>DGDZVP (Cl)  | 61  | 0.999926129 | 1.05684 | 0.00343 | -0.13663  | 4.29897  |
|                 | aug-cc-PVTZ (C,H)<br>DGDZVP (Cl) | 62  | 0.999806910 | 1.06485 | 0.00559 | -6.24889  | 7.00341  |
|                 | DGDZVP                           | 63  | 0.999890831 | 1.05746 | 0.00418 | -7.43779  | 5.22925  |
|                 | 6-311++G**                       | 64* | 0.999927687 | 1.05231 | 0.00338 | 0.47084   | 4.23517  |
|                 | aug-cc-PVTZ                      | 65* | 0.999797902 | 1.05545 | 0.00567 | -16.8217  | 7.10174  |



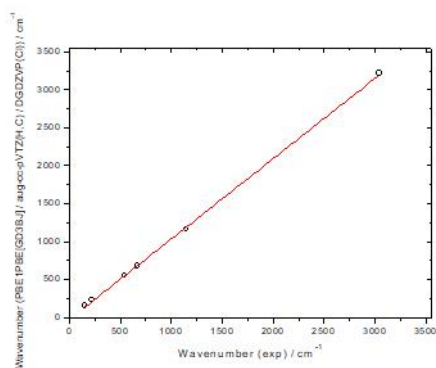

PBE0 / aug-cc-pVTZ (C,H), DGDZVP (Br)

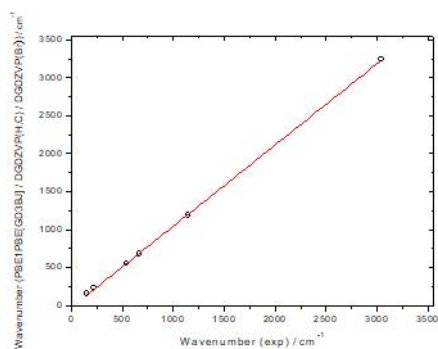

PBE0 / DGDZVP

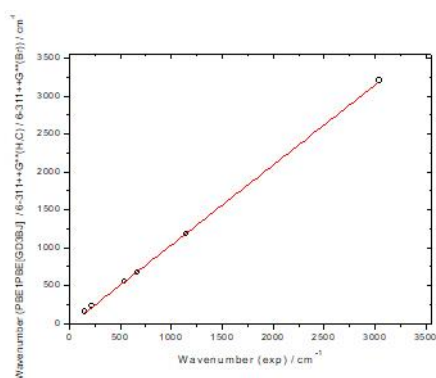

PBE0 / 6-311++G\*\*

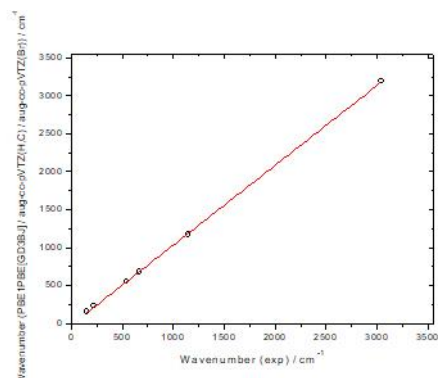

PBE0 / aug-cc-pVTZ

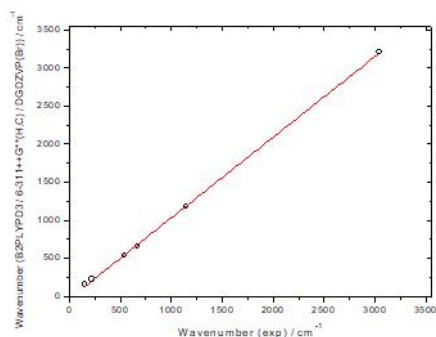

B2PLYP-D3 / 6-311++G\*\* (C,H), DGDZVP (Br)

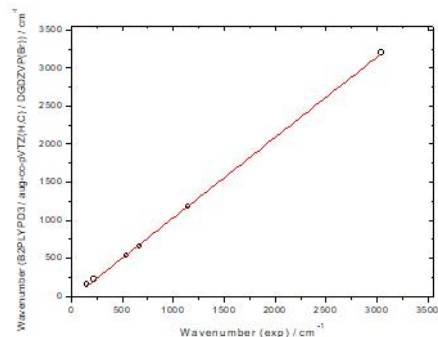

B2PLYP-D3 / aug-cc-pVTZ (C,H), DGDZVP (Br)

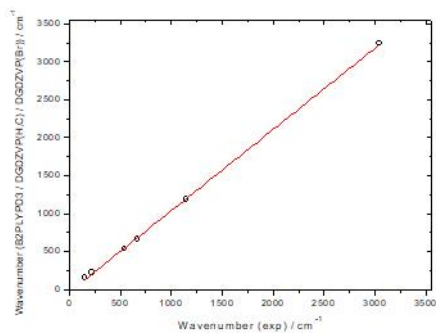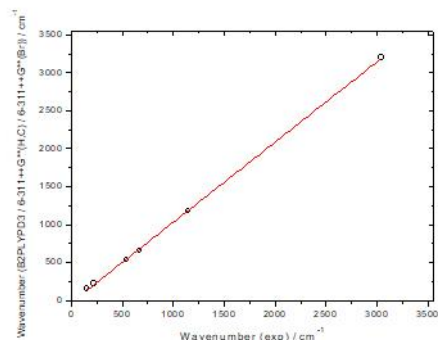



B2PLYP-D3 / DGDZVP

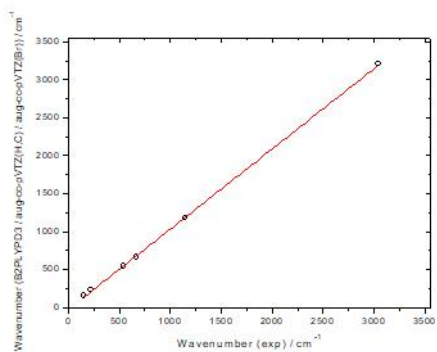

B2PLYP-D3 / 6-311++G\*\*

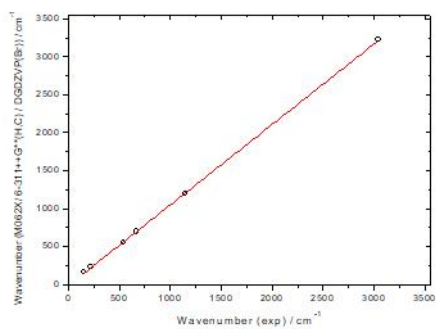

B2PLYP-D3 / aug-cc-PVTZ

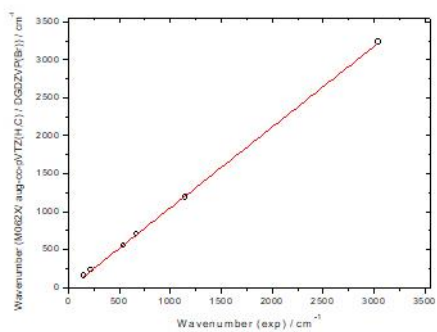

M06-2X / 6-311++G\*\* (C,H), DGDZVP (Br)

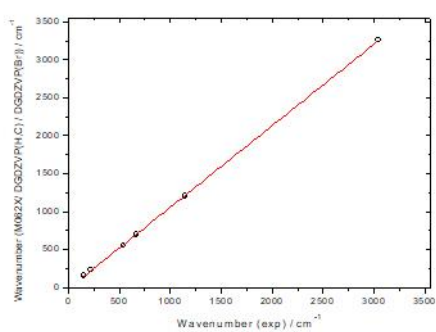

M06-2X / aug-cc-PVTZ (C,H), DGDZVP (Br)

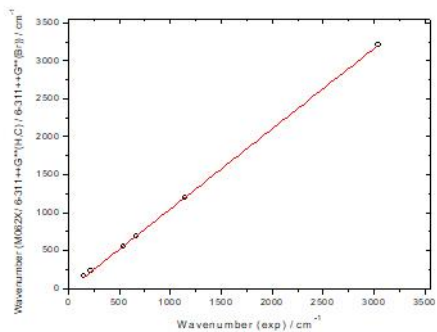

M06-2X / DGDZVP

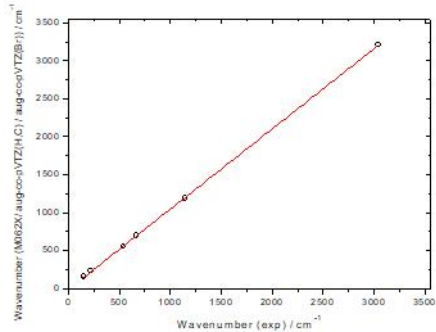

M06-2X / 6-311++G\*\*

M06-2X / aug-cc-PVTZ

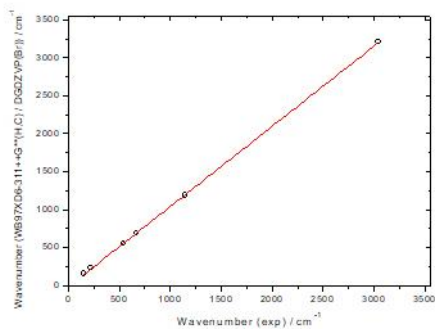

$\omega$ B97X-D / 6-311++G\*\* (C,H), DGDZVP (Br)

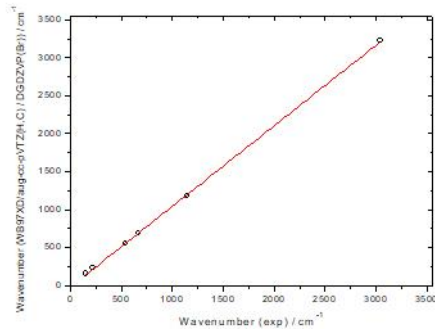

$\omega$ B97X-D / aug-cc-PVTZ (C,H), DGDZVP (Br)

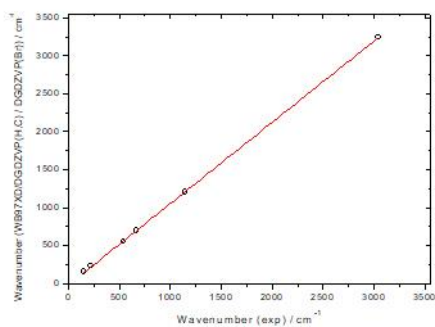

$\omega$ B97X-D / DGDZVP

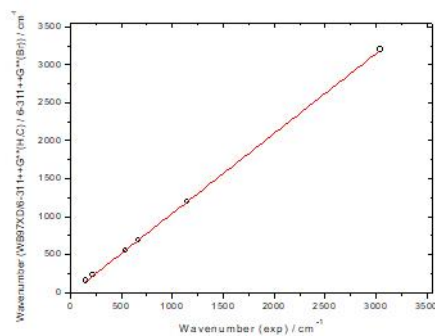

$\omega$ B97X-D / 6-311++G\*\*

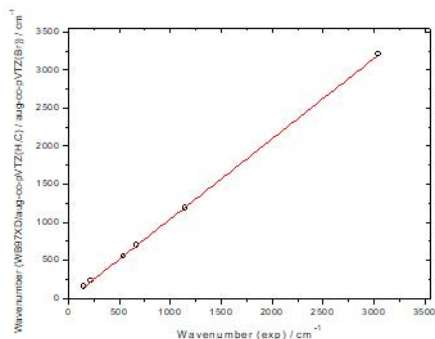

$\omega$ B97X-D / aug-cc-PVTZ

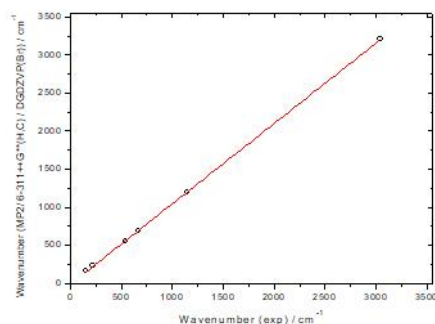

MP2 / 6-311++G\*\* (C,H), DGDZVP (Br)

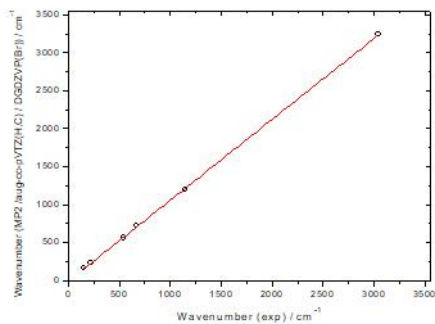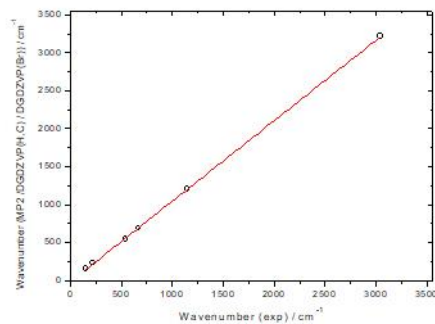

MP2 / aug-cc-PVTZ (C,H), DGDZVP (Br)

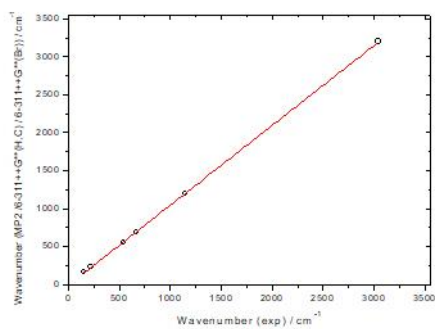

MP2 / 6-311++G\*\*

MP2 / DGDZVP

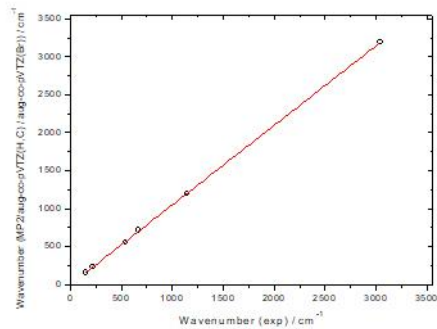

MP2 / aug-cc-PVTZ

**Figure SI.1.9** Linear Regression of Computed vs. Experimental Infrared Wavenumbers of Bromoform.

**Table SI.1.9** Statistical Parameters of Linear Regression of Computed vs. Experimental Infrared Wavenumbers of Bromoform.

| Method          | Basis Sets                       | No. | adj- $R^2$  | Slope   | Error   | Intercept | Error    |
|-----------------|----------------------------------|-----|-------------|---------|---------|-----------|----------|
| B3LYP           | 6-311++G** (C,H)<br>DGDZVP (Br)  | 11  | 0.999323118 | 1.05767 | 0.0104  | -39.6925  | 12.59015 |
|                 | aug-cc-PVTZ (C,H)<br>DGDZVP (Br) | 12  | 0.999252881 | 1.06255 | 0.01098 | -42.0728  | 13.28873 |
|                 | DGDZVP                           | 13  | 0.999338653 | 1.06931 | 0.0104  | -42.5699  | 12.58165 |
|                 | 6-311++G**                       | 14* | 0.999302773 | 1.05587 | 0.01054 | -37.8634  | 12.75633 |
|                 | aug-cc-PVTZ                      | 15* | 0.999410420 | 1.05553 | 0.00969 | -36.207   | 11.72585 |
| PBE0            | 6-311++G** (C,H)<br>DGDZVP (Br)  | 21  | 0.999775671 | 1.05772 | 0.00599 | -22.6974  | 7.24665  |
|                 | aug-cc-PVTZ (C,H)<br>DGDZVP (Br) | 22  | 0.999660476 | 1.05944 | 0.00738 | -24.3696  | 8.93016  |
|                 | DGDZVP                           | 23  | 0.999762896 | 1.07139 | 0.00624 | -26.3028  | 7.54647  |
|                 | 6-311++G**                       | 24* | 0.999800623 | 1.05565 | 0.00563 | -21.3726  | 6.81832  |
|                 | aug-cc-PVTZ                      | 25* | 0.999792125 | 1.05286 | 0.00574 | -19.4171  | 6.94371  |
| B2PLYP-D3       | 6-311++G** (C,H)<br>DGDZVP (Br)  | 31  | 0.999688555 | 1.06065 | 0.00708 | -29.1162  | 8.56262  |
|                 | aug-cc-PVTZ (C,H)<br>DGDZVP (Br) | 32  | 0.999695011 | 1.05818 | 0.00699 | -26.656   | 8.45363  |
|                 | DGDZVP                           | 33  | 0.999661157 | 1.07173 | 0.00746 | -32.9831  | 9.02472  |
|                 | 6-311++G**                       | 34* | 0.999694028 | 1.05818 | 0.007   | -26.6732  | 8.46724  |
|                 | aug-cc-PVTZ                      | 35* | 0.999772336 | 1.05784 | 0.00603 | -24.8616  | 7.30119  |
| M06-2X          | 6-311++G** (C,H)<br>DGDZVP (Br)  | 41  | 0.999951535 | 1.06122 | 0.00279 | -12.0906  | 3.37914  |
|                 | aug-cc-PVTZ (C,H)<br>DGDZVP (Br) | 42  | 0.999807400 | 1.06455 | 0.00558 | -14.8918  | 6.7579   |
|                 | DGDZVP                           | 43  | 0.999912937 | 1.07498 | 0.00379 | -16.5827  | 4.58788  |
|                 | 6-311++G**                       | 44* | 0.999948679 | 1.05901 | 0.00287 | -12.2256  | 3.47001  |
|                 | aug-cc-PVTZ                      | 45* | 0.999909578 | 1.05813 | 0.0038  | -12.3444  | 4.60227  |
| $\omega$ B97X-D | 6-311++G** (C,H)<br>DGDZVP (Br)  | 51  | 0.999934893 | 1.05702 | 0.00322 | -15.1453  | 3.90108  |
|                 | aug-cc-PVTZ (C,H)<br>DGDZVP (Br) | 52  | 0.999842205 | 1.06267 | 0.00505 | -19.325   | 6.106    |
|                 | DGDZVP                           | 53  | 0.999918102 | 1.07174 | 0.00367 | -18.7241  | 4.43631  |
|                 | 6-311++G**                       | 54* | 0.999954070 | 1.05464 | 0.0027  | -12.4868  | 3.26916  |
|                 | aug-cc-PVTZ                      | 55* | 0.999920750 | 1.05572 | 0.00355 | -13.576   | 4.29876  |
| MP2             | 6-311++G** (C,H)<br>DGDZVP (Br)  | 61  | 0.999920750 | 1.05676 | 0.0029  | -11.6714  | 3.5135   |
|                 | aug-cc-PVTZ (C,H)<br>DGDZVP (Br) | 62  | 0.999797202 | 1.0654  | 0.00574 | -6.27761  | 6.94009  |
|                 | DGDZVP                           | 63  | 0.999934011 | 1.06139 | 0.00326 | -15.8141  | 3.94368  |
|                 | 6-311++G**                       | 64* | 0.999962363 | 1.05344 | 0.00244 | -8.49079  | 2.95598  |
|                 | aug-cc-PVTZ                      | 65* | 0.999962363 | 1.04951 | 0.00389 | -0.97566  | 4.71175  |

## 5. CH<sub>3</sub>

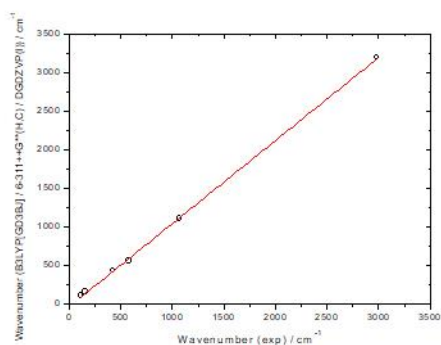

B3LYP / 6-311++G\*\* (C,H), DGDZVP (I)

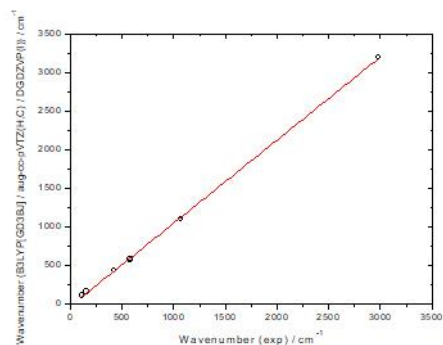

B3LYP / aug-cc-PVTZ (C,H), DGDZVP (I)

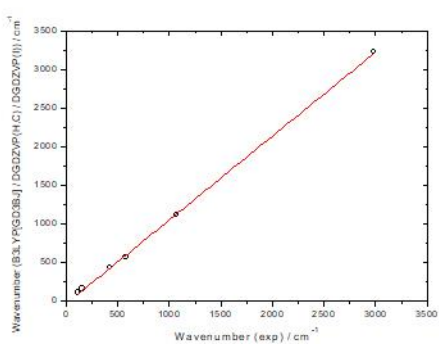

B3LYP / DGDZVP

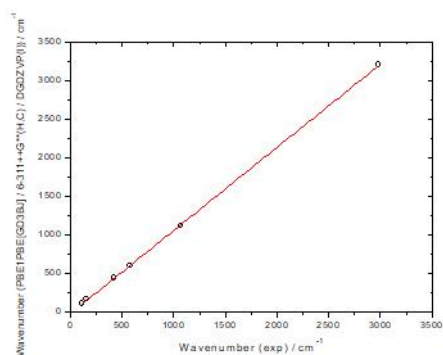

PBE0 / 6-311++G\*\* (C,H), DGDZVP (I)

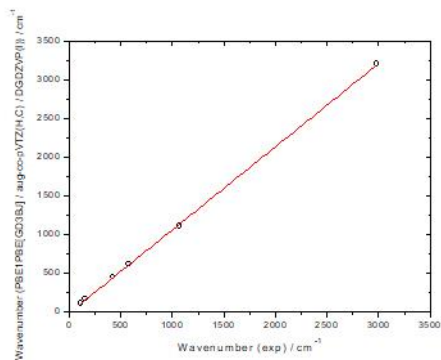

PBE0 / aug-cc-PVTZ (C,H), DGDZVP (I)

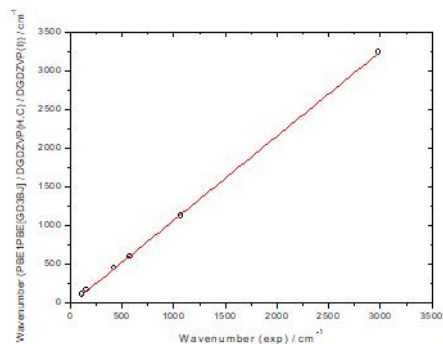

PBE0 / DGDZVP

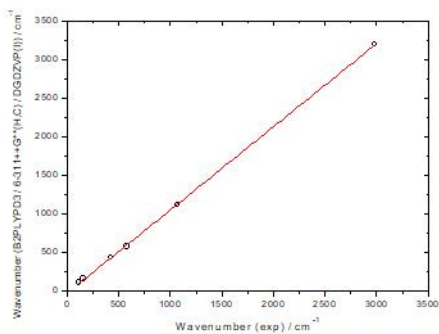

B2PLYP-D3 / 6-311++G\*\* (C,H), DGDZVP (I)

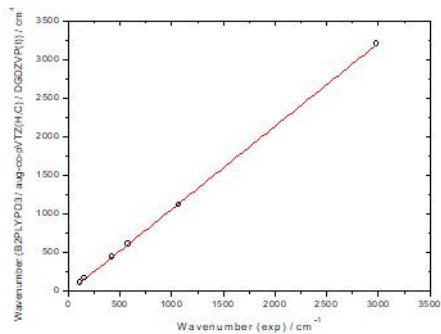

B2PLYP-D3 / aug-cc-pVTZ (C,H), DGDZVP (I)

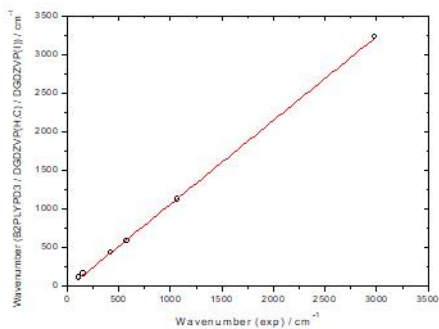

B2PLYP-D3 / DGDZVP

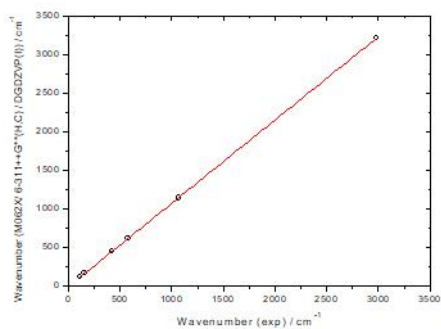

M06-2X / 6-311++G\*\* (C,H), DGDZVP (I)

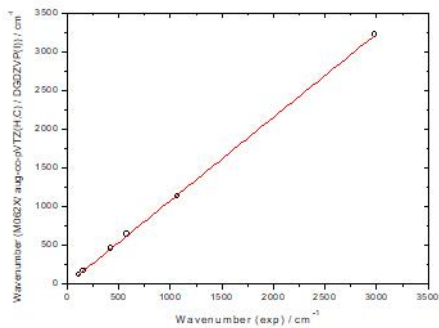

M06-2X / aug-cc-pVTZ (C,H), DGDZVP (I)

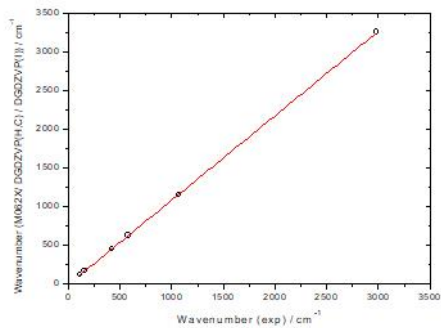

M06-2X / DGDZVP

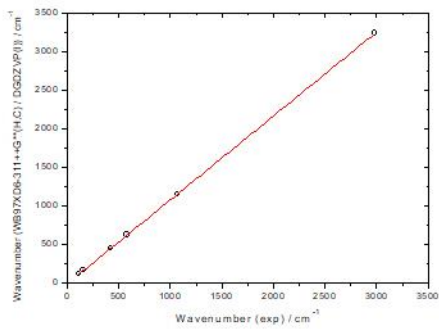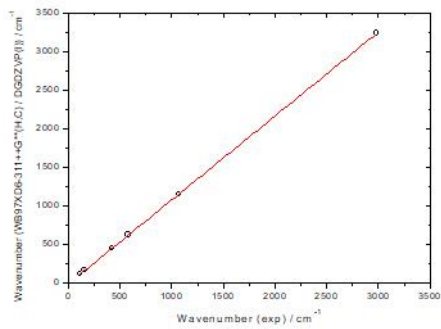

$\omega$ B97X-D / 6-311++G\*\* (C,H), DGDZVP (I)

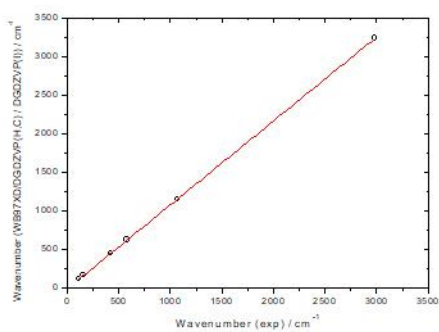

$\omega$ B97X-D / aug-cc-PVTZ (C,H), DGDZVP (I)

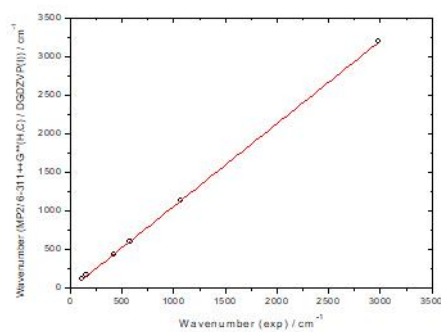

$\omega$ B97X-D / DGDZVP

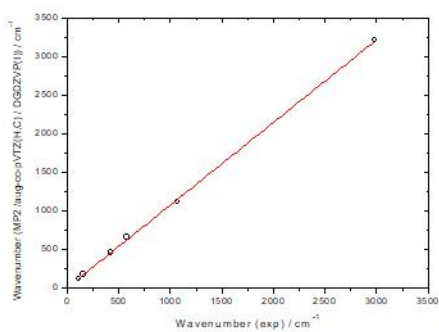

MP2 / 6-311++G\*\* (C,H), DGDZVP (I)

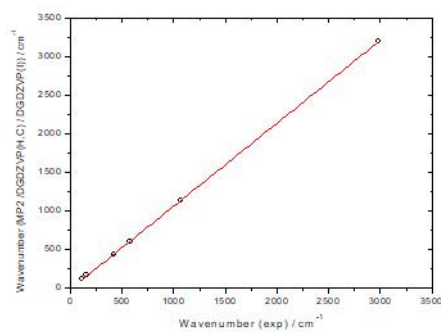

MP2 / aug-cc-PVTZ (C,H), DGDZVP (I)

MP2 / DGDZVP

**Figure SI.1.10** Linear Regression of Computed vs. Experimental Infrared Wavenumbers of Iodoform.

**Table SI.1.10** Statistical Parameters of Linear Regression of Computed vs. Experimental Infrared Wavenumbers of Iodoform.

| Method          | Basis Sets                      | No. | adj- $R^2$  | Slope   | Error   | Intercept | Error    |
|-----------------|---------------------------------|-----|-------------|---------|---------|-----------|----------|
| B3LYP           | 6-311++G** (C,H)<br>DGDZVP (I)  | 11  | 0.999453219 | 1.07881 | 0.00954 | -37.9981  | 11.04483 |
|                 | aug-cc-PVTZ (C,H)<br>DGDZVP (I) | 12  | 0.999647663 | 1.07939 | 0.00766 | -32.7338  | 8.86999  |
|                 | DGDZVP                          | 13  | 0.999483457 | 1.08907 | 0.00936 | -39.2867  | 10.83701 |
|                 | 6-311++G**                      | 14* | 0.999815823 | 1.07947 | 0.00554 | -23.9418  | 6.41294  |
|                 | aug-cc-PVTZ                     | 15* | 0.999714997 | 1.07686 | 0.00687 | -18.6596  | 7.95855  |
| PBE0            | 6-311++G** (C,H)<br>DGDZVP (I)  | 21  | 0.999812334 | 1.09161 | 0.00565 | -25.6354  | 6.54621  |
|                 | aug-cc-PVTZ (C,H)<br>DGDZVP (I) | 22  | 0.999697328 | 1.08029 | 0.0071  | -30.9269  | 8.2277   |
|                 | DGDZVP                          | 23  | 0.999804081 | 1.07889 | 0.00571 | -21.2621  | 6.61071  |
|                 | 6-311++G**                      | 24* | 0.999714617 | 1.08979 | 0.00696 | -32.1508  | 8.05946  |
|                 | aug-cc-PVTZ                     | 25* | 0.999984079 | 1.0822  | 0.00163 | -11.6092  | 1.89012  |
| B2PLYP-D3       | 6-311++G** (C,H)<br>DGDZVP (I)  | 31  | 0.999810651 | 1.08117 | 0.00562 | -7.53247  | 6.5126   |
|                 | aug-cc-PVTZ (C,H)<br>DGDZVP (I) | 32  | 0.999964545 | 1.0943  | 0.00246 | -13.6277  | 2.85215  |
|                 | DGDZVP                          | 33  | 0.999965809 | 1.09044 | 0.00241 | -14.8925  | 2.79096  |
|                 | 6-311++G**                      | 34* | 0.999836260 | 1.07895 | 0.00522 | -9.98625  | 6.04367  |
|                 | aug-cc-PVTZ                     | 35* | 0.999965764 | 1.09044 | 0.00241 | -14.9156  | 2.79282  |
| M06-2X          | 6-311++G** (C,H)<br>DGDZVP (I)  | 41  | 0.999933878 | 1.07495 | 0.0033  | -17.9394  | 3.82619  |
|                 | aug-cc-PVTZ (C,H)<br>DGDZVP (I) | 42  | 0.999423705 | 1.07371 | 0.00975 | -0.23083  | 11.28552 |
|                 | DGDZVP                          | 43  | 0.999929053 | 1.07804 | 0.00343 | -19.0846  | 3.97473  |
|                 | 6-311++G**                      | 44* | 0.999453219 | 1.07881 | 0.00954 | -37.9981  | 11.04483 |
|                 | aug-cc-PVTZ                     | 45* | 0.999647663 | 1.07939 | 0.00766 | -32.7338  | 8.86999  |
| $\omega$ B97X-D | 6-311++G** (C,H)<br>DGDZVP (I)  | 51  | 0.999483457 | 1.08907 | 0.00936 | -39.2867  | 10.83701 |
|                 | aug-cc-PVTZ (C,H)<br>DGDZVP (I) | 52  | 0.999815823 | 1.07947 | 0.00554 | -23.9418  | 6.41294  |
|                 | DGDZVP                          | 53  | 0.999714997 | 1.07686 | 0.00687 | -18.6596  | 7.95855  |
|                 | 6-311++G**                      | 54* | 0.999812334 | 1.09161 | 0.00565 | -25.6354  | 6.54621  |
|                 | aug-cc-PVTZ                     | 55* | 0.999697328 | 1.08029 | 0.0071  | -30.9269  | 8.2277   |
| MP2             | 6-311++G** (C,H)<br>DGDZVP (I)  | 61  | 0.999804081 | 1.07889 | 0.00571 | -21.2621  | 6.61071  |
|                 | aug-cc-PVTZ (C,H)<br>DGDZVP (I) | 62  | 0.999714617 | 1.08979 | 0.00696 | -32.1508  | 8.05946  |
|                 | DGDZVP                          | 63  | 0.999984079 | 1.0822  | 0.00163 | -11.6092  | 1.89012  |
|                 | 6-311++G**                      | 64* | 0.999810651 | 1.08117 | 0.00562 | -7.53247  | 6.5126   |
|                 | aug-cc-PVTZ                     | 65* | 0.999964545 | 1.0943  | 0.00246 | -13.6277  | 2.85215  |



### SI.1. 4 Electronic Polarizability

Calculated isotropic static electronic polarizability ( $\alpha_e$ ), discrepancies with respect to the experimental values ( $\Delta$ ), their quadratic averages ( $\langle\Delta^2\rangle$ ), and differences of quadratic averages with respect to the minimum value ( $\langle\Delta^2\rangle-\langle\Delta^2\rangle_{min}$ ). Calculated values are obtained with the same levels of theory as reported above.

**Table SI.1.11** Pyridine

| No. | $\alpha_e / \text{\AA}^3$ | $\Delta / \text{\AA}^3$                   | $\langle\Delta^2\rangle / \text{\AA}^6$ | $(\langle\Delta^2\rangle-\langle\Delta^2\rangle_{min})/\text{\AA}^6$ |
|-----|---------------------------|-------------------------------------------|-----------------------------------------|----------------------------------------------------------------------|
|     |                           | exp <sup>a</sup> :<br>9.17 $\text{\AA}^3$ |                                         |                                                                      |
| 11  | 9.05                      | -0.12                                     | 0.01                                    | 0.01                                                                 |
| 12  | 9.46                      | 0.29                                      | 0.09                                    | 0.08                                                                 |
| 13  | 8.02                      | -1.15                                     | 1.32                                    | 1.31                                                                 |
| 21  | 8.91                      | -0.26                                     | 0.07                                    | 0.06                                                                 |
| 22  | 9.33                      | 0.16                                      | 0.03                                    | 0.02                                                                 |
| 23  | 7.98                      | -1.19                                     | 1.41                                    | 1.41                                                                 |
| 31  | 9.02                      | -0.15                                     | 0.02                                    | 0.02                                                                 |
| 32  | 9.45                      | 0.28                                      | 0.08                                    | 0.07                                                                 |
| 33  | 8.01                      | -1.16                                     | 1.34                                    | 1.33                                                                 |
| 41  | 8.79                      | -0.38                                     | 0.14                                    | 0.14                                                                 |
| 42  | 9.26                      | 0.09                                      | 0.01                                    | 0.00                                                                 |
| 43  | 7.98                      | -1.19                                     | 1.42                                    | 1.41                                                                 |
| 51  | 8.89                      | -0.28                                     | 0.08                                    | 0.07                                                                 |
| 52  | 9.32                      | 0.15                                      | 0.02                                    | 0.01                                                                 |
| 53  | 7.97                      | -1.20                                     | 1.44                                    | 1.44                                                                 |
| 61  | 8.99                      | -0.18                                     | 0.03                                    | 0.02                                                                 |
| 62  | 9.44                      | 0.27                                      | 0.07                                    | 0.07                                                                 |

<sup>a</sup> From: CRC Handbook of Chemistry and Physics, 99th Edition, Editor-in-Chief: John R. Rumble.**Table SI.1.12** CHF<sub>3</sub>

| No. | $\alpha_e / \text{\AA}^3$ | $\Delta_1 / \text{\AA}^3$                 | $\Delta_2 / \text{\AA}^3$                 | $\Delta_3 / \text{\AA}^3$                 | $\Delta_4 / \text{\AA}^3$                 | $\Delta_5 / \text{\AA}^3$                 | $\Delta_6 / \text{\AA}^3$                 | $\Delta_7 / \text{\AA}^3$                 | $\langle \Delta \rangle / \text{\AA}^6$ | $(\langle \Delta \rangle - \langle \Delta \rangle_{min}) / \text{\AA}^6$ |
|-----|---------------------------|-------------------------------------------|-------------------------------------------|-------------------------------------------|-------------------------------------------|-------------------------------------------|-------------------------------------------|-------------------------------------------|-----------------------------------------|--------------------------------------------------------------------------|
|     |                           | exp <sup>a</sup> :<br>2.62 $\text{\AA}^3$ | exp <sup>b</sup> :<br>2.75 $\text{\AA}^3$ | exp <sup>c</sup> :<br>2.77 $\text{\AA}^3$ | exp <sup>d</sup> :<br>2.76 $\text{\AA}^3$ | exp <sup>e</sup> :<br>2.79 $\text{\AA}^3$ | exp <sup>f</sup> :<br>2.85 $\text{\AA}^3$ | exp <sup>g</sup> :<br>2.55 $\text{\AA}^3$ |                                         |                                                                          |
| 11  | 2.29                      | -0.33                                     | -0.47                                     | -0.48                                     | -0.48                                     | -0.50                                     | -0.56                                     | -0.26                                     | 0.20                                    | 0.19                                                                     |
| 12  | 2.63                      | 0.01                                      | -0.12                                     | -0.14                                     | -0.13                                     | -0.16                                     | -0.22                                     | 0.08                                      | 0.02                                    | 0.01                                                                     |
| 13  | 2.12                      | -0.50                                     | -0.64                                     | -0.65                                     | -0.65                                     | -0.67                                     | -0.73                                     | -0.43                                     | 0.38                                    | 0.37                                                                     |
| 14  | 2.39                      | -0.23                                     | -0.36                                     | -0.37                                     | -0.37                                     | -0.39                                     | -0.45                                     | -0.15                                     | 0.12                                    | 0.11                                                                     |
| 15  | 2.81                      | 0.19                                      | 0.06                                      | 0.04                                      | 0.05                                      | 0.02                                      | -0.04                                     | 0.26                                      | 0.02                                    | 0.01                                                                     |
| 21  | 2.25                      | -0.37                                     | -0.50                                     | -0.52                                     | -0.51                                     | -0.54                                     | -0.60                                     | -0.30                                     | 0.24                                    | 0.23                                                                     |
| 22  | 2.58                      | -0.04                                     | -0.17                                     | -0.19                                     | -0.18                                     | -0.20                                     | -0.26                                     | 0.04                                      | 0.03                                    | 0.02                                                                     |
| 23  | 2.09                      | -0.53                                     | -0.66                                     | -0.68                                     | -0.67                                     | -0.70                                     | -0.76                                     | -0.46                                     | 0.41                                    | 0.41                                                                     |
| 24  | 2.34                      | -0.28                                     | -0.41                                     | -0.43                                     | -0.42                                     | -0.45                                     | -0.51                                     | -0.21                                     | 0.16                                    | 0.15                                                                     |
| 25  | 2.75                      | 0.13                                      | 0.00                                      | -0.02                                     | -0.01                                     | -0.04                                     | -0.09                                     | 0.20                                      | 0.01                                    | 0.00                                                                     |
| 31  | 2.26                      | -0.36                                     | -0.49                                     | -0.51                                     | -0.50                                     | -0.53                                     | -0.59                                     | -0.29                                     | 0.23                                    | 0.22                                                                     |
| 32  | 2.60                      | -0.02                                     | -0.15                                     | -0.17                                     | -0.16                                     | -0.19                                     | -0.25                                     | 0.05                                      | 0.03                                    | 0.02                                                                     |
| 33  | 2.10                      | -0.52                                     | -0.65                                     | -0.67                                     | -0.66                                     | -0.68                                     | -0.74                                     | -0.45                                     | 0.40                                    | 0.39                                                                     |
| 34  | 2.36                      | -0.26                                     | -0.40                                     | -0.41                                     | -0.40                                     | -0.43                                     | -0.49                                     | -0.19                                     | 0.15                                    | 0.14                                                                     |
| 35  | 2.77                      | 0.15                                      | 0.02                                      | 0.00                                      | 0.01                                      | -0.01                                     | -0.07                                     | 0.22                                      | 0.01                                    | 0.00                                                                     |
| 41  | 2.57                      | -0.05                                     | -0.19                                     | -0.20                                     | -0.19                                     | -0.22                                     | -0.28                                     | 0.02                                      | 0.03                                    | 0.03                                                                     |
| 42  | 2.57                      | -0.05                                     | -0.19                                     | -0.20                                     | -0.19                                     | -0.22                                     | -0.28                                     | 0.02                                      | 0.03                                    | 0.03                                                                     |
| 43  | 2.05                      | -0.57                                     | -0.70                                     | -0.72                                     | -0.71                                     | -0.74                                     | -0.80                                     | -0.50                                     | 0.47                                    | 0.46                                                                     |
| 44  | 2.25                      | -0.37                                     | -0.50                                     | -0.52                                     | -0.51                                     | -0.54                                     | -0.60                                     | -0.30                                     | 0.24                                    | 0.23                                                                     |
| 45  | 2.67                      | 0.05                                      | -0.08                                     | -0.10                                     | -0.09                                     | -0.12                                     | -0.18                                     | 0.12                                      | 0.01                                    | 0.00                                                                     |

|    |      |       |       |       |       |       |       |       |      |      |
|----|------|-------|-------|-------|-------|-------|-------|-------|------|------|
| 51 | 2.75 | 0.13  | 0.00  | -0.02 | -0.01 | -0.03 | -0.09 | 0.21  | 0.01 | 0.00 |
| 52 | 2.75 | 0.13  | 0.00  | -0.02 | -0.01 | -0.03 | -0.09 | 0.21  | 0.01 | 0.00 |
| 53 | 2.75 | 0.13  | 0.00  | -0.02 | -0.01 | -0.03 | -0.09 | 0.21  | 0.01 | 0.00 |
| 54 | 2.75 | 0.13  | 0.00  | -0.02 | -0.01 | -0.03 | -0.09 | 0.21  | 0.01 | 0.00 |
| 55 | 2.75 | 0.13  | 0.00  | -0.02 | -0.01 | -0.03 | -0.09 | 0.21  | 0.01 | 0.00 |
| 61 | 2.23 | -0.39 | -0.52 | -0.54 | -0.53 | -0.55 | -0.61 | -0.32 | 0.25 | 0.24 |
| 62 | 2.57 | -0.05 | -0.19 | -0.20 | -0.19 | -0.22 | -0.28 | 0.02  | 0.03 | 0.03 |
| 63 | 2.10 | -0.52 | -0.66 | -0.67 | -0.66 | -0.69 | -0.75 | -0.45 | 0.41 | 0.40 |
| 64 | 2.30 | -0.32 | -0.45 | -0.47 | -0.46 | -0.48 | -0.54 | -0.25 | 0.19 | 0.18 |
| 65 | 2.73 | 0.11  | -0.03 | -0.04 | -0.03 | -0.06 | -0.12 | 0.18  | 0.01 | 0.00 |

---

<sup>a</sup> From: CRC Handbook of Chemistry and Physics, 99th Edition, Editor-in-Chief: John R. Rumble.

<sup>b-g</sup> From: M. Gussoni, M. Rui, G. Zerbi, *J. Mol. Struct.* **1998**, *447*, 163-215 and references therein.

**Table SI.1.13** CHCl<sub>3</sub>

| No. | $\alpha_e / \text{\AA}^3$ | $\Delta_1 / \text{\AA}^3$<br>exp <sup>a</sup> :<br>8.13 $\text{\AA}^3$ | $\Delta_2 / \text{\AA}^3$<br>exp <sup>b</sup> :<br>8.33 $\text{\AA}^3$ | $\Delta_3 / \text{\AA}^3$<br>exp <sup>c</sup> :<br>9.13 $\text{\AA}^3$ | $\Delta_4 / \text{\AA}^3$<br>exp <sup>d</sup> :<br>9.22 $\text{\AA}^3$ | $\langle \Delta \rangle / \text{\AA}^6$ | $(\langle \Delta \rangle - \langle \Delta \rangle_{min}) / \text{\AA}^6$ |
|-----|---------------------------|------------------------------------------------------------------------|------------------------------------------------------------------------|------------------------------------------------------------------------|------------------------------------------------------------------------|-----------------------------------------|--------------------------------------------------------------------------|
| 11  | 6.67                      | -1.46                                                                  | -1.66                                                                  | -2.46                                                                  | -2.55                                                                  | 4.36                                    | 4.12                                                                     |
| 12  | 7.72                      | -0.41                                                                  | -0.61                                                                  | -1.41                                                                  | -1.49                                                                  | 1.19                                    | 0.94                                                                     |
| 13  | 8.59                      | 0.46                                                                   | 0.26                                                                   | -0.54                                                                  | -0.63                                                                  | 0.24                                    | 0.00                                                                     |
| 14  | 7.23                      | -0.90                                                                  | -1.10                                                                  | -1.90                                                                  | -1.99                                                                  | 2.40                                    | 2.16                                                                     |
| 15  | 8.59                      | 0.46                                                                   | 0.26                                                                   | -0.54                                                                  | -0.63                                                                  | 0.24                                    | 0.00                                                                     |
| 21  | 6.49                      | -1.64                                                                  | -1.84                                                                  | -2.63                                                                  | -2.72                                                                  | 5.10                                    | 4.86                                                                     |
| 22  | 7.56                      | -0.57                                                                  | -0.77                                                                  | -1.57                                                                  | -1.66                                                                  | 1.54                                    | 1.30                                                                     |
| 23  | 5.96                      | -2.17                                                                  | -2.37                                                                  | -3.17                                                                  | -3.26                                                                  | 7.76                                    | 7.52                                                                     |
| 24  | 6.99                      | -1.14                                                                  | -1.35                                                                  | -2.14                                                                  | -2.23                                                                  | 3.17                                    | 2.93                                                                     |
| 25  | 8.37                      | 0.24                                                                   | 0.04                                                                   | -0.76                                                                  | -0.85                                                                  | 0.34                                    | 0.10                                                                     |
| 31  | 8.45                      | 0.32                                                                   | 0.12                                                                   | -0.68                                                                  | -0.77                                                                  | 0.29                                    | 0.05                                                                     |
| 32  | 8.45                      | 0.32                                                                   | 0.12                                                                   | -0.68                                                                  | -0.77                                                                  | 0.29                                    | 0.05                                                                     |
| 33  | 8.45                      | 0.32                                                                   | 0.12                                                                   | -0.68                                                                  | -0.77                                                                  | 0.29                                    | 0.05                                                                     |
| 34  | 8.45                      | 0.32                                                                   | 0.12                                                                   | -0.68                                                                  | -0.77                                                                  | 0.29                                    | 0.05                                                                     |
| 35  | 8.45                      | 0.32                                                                   | 0.12                                                                   | -0.68                                                                  | -0.77                                                                  | 0.29                                    | 0.05                                                                     |
| 41  | 6.48                      | -1.65                                                                  | -1.85                                                                  | -2.65                                                                  | -2.74                                                                  | 5.16                                    | 4.92                                                                     |
| 42  | 7.56                      | -0.57                                                                  | -0.77                                                                  | -1.57                                                                  | -1.66                                                                  | 1.54                                    | 1.30                                                                     |
| 43  | 5.95                      | -2.18                                                                  | -2.38                                                                  | -3.18                                                                  | -3.27                                                                  | 7.81                                    | 7.57                                                                     |
| 44  | 6.98                      | -1.15                                                                  | -1.35                                                                  | -2.15                                                                  | -2.24                                                                  | 3.20                                    | 2.96                                                                     |
| 45  | 8.34                      | 0.21                                                                   | 0.01                                                                   | -0.79                                                                  | -0.87                                                                  | 0.36                                    | 0.12                                                                     |
| 51  | 6.45                      | -1.68                                                                  | -1.88                                                                  | -2.68                                                                  | -2.77                                                                  | 5.29                                    | 5.05                                                                     |
| 52  | 7.54                      | -0.59                                                                  | -0.79                                                                  | -1.58                                                                  | -1.67                                                                  | 1.57                                    | 1.33                                                                     |
| 53  | 5.91                      | -2.22                                                                  | -2.42                                                                  | -3.22                                                                  | -3.31                                                                  | 8.01                                    | 7.77                                                                     |
| 54  | 6.97                      | -1.16                                                                  | -1.36                                                                  | -2.16                                                                  | -2.25                                                                  | 3.24                                    | 3.00                                                                     |
| 55  | 8.36                      | 0.23                                                                   | 0.03                                                                   | -0.76                                                                  | -0.85                                                                  | 0.34                                    | 0.10                                                                     |

|    |      |       |       |       |       |      |      |
|----|------|-------|-------|-------|-------|------|------|
| 61 | 6.35 | -1.78 | -1.99 | -2.78 | -2.87 | 5.78 | 5.54 |
| 62 | 7.44 | -0.69 | -0.89 | -1.69 | -1.78 | 1.82 | 1.58 |
| 63 | 5.82 | -2.31 | -2.51 | -3.30 | -3.39 | 8.51 | 8.27 |
| 64 | 6.84 | -1.29 | -1.50 | -2.29 | -2.38 | 3.71 | 3.47 |
| 65 | 8.29 | 0.16  | -0.04 | -0.84 | -0.93 | 0.40 | 0.16 |

---

<sup>a</sup> From: CRC Handbook of Chemistry and Physics, 99th Edition, Editor-in-Chief: John R. Rumble.

<sup>b-d</sup> From: M. Gussoni, M. Rui, G. Zerbi, *J. Mol. Struct.***1998**, 447, 163-215 and references therein.

**Table SI.1.14** CHBr<sub>3</sub>

| No. | $\alpha_e / \text{\AA}^3$ | $\Delta / \text{\AA}^3$<br>exp <sup>a</sup> :<br>11.84 $\text{\AA}^3$ | $\langle \Delta \rangle / \text{\AA}^6$ | $(\langle \Delta \rangle - \langle \Delta \rangle_{min}) / \text{\AA}^6$ |
|-----|---------------------------|-----------------------------------------------------------------------|-----------------------------------------|--------------------------------------------------------------------------|
| 11  | 10.01                     | -1.83                                                                 | 3.33                                    | 3.33                                                                     |
| 12  | 10.94                     | -0.90                                                                 | 0.81                                    | 0.80                                                                     |
| 13  | 9.43                      | -2.41                                                                 | 5.80                                    | 5.79                                                                     |
| 14  | 10.35                     | -1.49                                                                 | 2.22                                    | 2.22                                                                     |
| 15  | 12.03                     | 0.19                                                                  | 0.04                                    | 0.03                                                                     |
| 21  | 9.76                      | -2.08                                                                 | 4.33                                    | 4.32                                                                     |
| 22  | 10.68                     | -1.16                                                                 | 1.35                                    | 1.34                                                                     |
| 23  | 9.24                      | -2.60                                                                 | 6.74                                    | 6.73                                                                     |
| 24  | 9.99                      | -1.85                                                                 | 3.42                                    | 3.42                                                                     |
| 25  | 11.69                     | -0.15                                                                 | 0.02                                    | 0.02                                                                     |
| 31  | 9.81                      | -2.03                                                                 | 4.12                                    | 4.11                                                                     |
| 32  | 10.05                     | -1.79                                                                 | 3.21                                    | 3.20                                                                     |
| 33  | 9.27                      | -2.57                                                                 | 6.60                                    | 6.60                                                                     |
| 34  | 10.05                     | -1.79                                                                 | 3.21                                    | 3.20                                                                     |
| 35  | 11.76                     | -0.08                                                                 | 0.01                                    | 0.00                                                                     |
| 41  | 9.59                      | -2.25                                                                 | 5.05                                    | 5.04                                                                     |
| 42  | 10.48                     | -1.36                                                                 | 1.84                                    | 1.84                                                                     |
| 43  | 9.12                      | -2.72                                                                 | 7.42                                    | 7.42                                                                     |
| 44  | 9.87                      | -1.97                                                                 | 3.87                                    | 3.86                                                                     |
| 45  | 11.60                     | -0.24                                                                 | 0.06                                    | 0.05                                                                     |
| 51  | 9.69                      | -2.15                                                                 | 4.64                                    | 4.63                                                                     |
| 52  | 10.63                     | -1.21                                                                 | 1.46                                    | 1.45                                                                     |
| 53  | 9.17                      | -2.67                                                                 | 7.15                                    | 7.14                                                                     |
| 54  | 9.90                      | -1.94                                                                 | 3.74                                    | 3.74                                                                     |
| 55  | 11.66                     | -0.18                                                                 | 0.03                                    | 0.03                                                                     |

|    |       |       |      |      |
|----|-------|-------|------|------|
| 61 | 9.53  | -2.31 | 5.34 | 5.33 |
| 62 | 10.44 | -1.40 | 1.96 | 1.95 |
| 63 | 9.04  | -2.80 | 7.85 | 7.85 |
| 64 | 9.62  | -2.22 | 4.91 | 4.90 |
| 65 | 11.55 | -0.29 | 0.08 | 0.08 |

---

<sup>a</sup> From: CRC Handbook of Chemistry and Physics, 99th Edition, Editor-in-Chief: John R. Rumble.

**Table SI.1.15** CH<sub>3</sub>

| No. | $\alpha_e / \text{Å}^3$ | $\Delta / \text{Å}^3$<br>exp <sup>a</sup> :<br>18.04 Å <sup>3</sup> | $\langle \Delta \rangle / \text{Å}^6$ | $(\langle \Delta \rangle - \langle \Delta \rangle_{min}) / \text{Å}^6$ |
|-----|-------------------------|---------------------------------------------------------------------|---------------------------------------|------------------------------------------------------------------------|
| 11  | 15.58                   | -2.46                                                               | 6.06                                  | 3.21                                                                   |
| 12  | 16.35                   | -1.69                                                               | 2.85                                  | 0.00                                                                   |
| 13  | 14.94                   | -3.10                                                               | 9.58                                  | 6.73                                                                   |
| 21  | 15.22                   | -2.82                                                               | 7.94                                  | 5.08                                                                   |
| 22  | 15.98                   | -2.06                                                               | 4.23                                  | 1.37                                                                   |
| 23  | 14.67                   | -3.37                                                               | 11.38                                 | 8.53                                                                   |
| 31  | 15.28                   | -2.76                                                               | 7.63                                  | 4.78                                                                   |
| 32  | 16.00                   | -2.04                                                               | 4.16                                  | 1.31                                                                   |
| 33  | 14.68                   | -3.36                                                               | 11.30                                 | 8.44                                                                   |
| 41  | 14.93                   | -3.11                                                               | 9.69                                  | 6.84                                                                   |
| 42  | 15.65                   | -2.39                                                               | 5.72                                  | 2.86                                                                   |
| 43  | 14.43                   | -3.61                                                               | 13.02                                 | 10.17                                                                  |
| 51  | 14.47                   | -3.57                                                               | 12.72                                 | 9.87                                                                   |
| 52  | 15.84                   | -2.20                                                               | 4.84                                  | 1.99                                                                   |
| 53  | 14.47                   | -3.57                                                               | 12.72                                 | 9.87                                                                   |
| 61  | 14.87                   | -3.17                                                               | 10.08                                 | 7.23                                                                   |
| 62  | 15.54                   | -2.50                                                               | 6.24                                  | 3.39                                                                   |
| 63  | 14.30                   | -3.74                                                               | 13.96                                 | 11.11                                                                  |

<sup>a</sup> From: CRC Handbook of Chemistry and Physics, 99th Edition, Editor-in-Chief: John R. Rumble.



## Part II – Pyridine-Haloforms Complexes

### SI.2. 1 Optimised Geometries

#### 1. Py-CHF<sub>3</sub>

|   |             |             |             |
|---|-------------|-------------|-------------|
| C | 1.97789000  | 0.84663700  | -0.00509600 |
| C | 3.32758200  | 1.17561600  | -0.00840500 |
| C | 4.25952300  | 0.14691000  | -0.00167500 |
| C | 3.80374800  | -1.16455100 | 0.00805000  |
| C | 2.43298000  | -1.38921700 | 0.01061900  |
| N | 1.52913300  | -0.40930900 | 0.00422200  |
| H | 5.32193700  | 0.36305700  | -0.00396700 |
| H | 1.21978900  | 1.62448600  | -0.01013800 |
| H | 3.63428100  | 2.21437300  | -0.01607200 |
| H | 4.49248500  | -2.00052000 | 0.01355500  |
| H | 2.04090700  | -2.40197800 | 0.01815100  |
| C | -1.68500400 | 0.02457400  | 0.00327000  |
| H | -0.68794800 | -0.42152600 | 0.00561400  |
| F | -2.38519200 | -0.33159500 | 1.08834500  |
| F | -2.38466700 | -0.34192000 | -1.07870700 |
| F | -1.59087500 | 1.36599100  | -0.00310600 |

#### 2. Py-CHCl<sub>3</sub>

|    |             |             |             |
|----|-------------|-------------|-------------|
| C  | 2.07566100  | 1.00243900  | -0.01115900 |
| C  | 3.45061500  | 1.19877700  | -0.01534300 |
| C  | 4.27858300  | 0.08459000  | -0.00200900 |
| C  | 3.69892000  | -1.17690500 | 0.01493000  |
| C  | 2.31310600  | -1.26857500 | 0.01777200  |
| N  | 1.50965200  | -0.20496000 | 0.00504100  |
| H  | 5.35687700  | 0.19721800  | -0.00476800 |
| H  | 1.39441400  | 1.84811300  | -0.02121100 |
| H  | 3.85661400  | 2.20277900  | -0.02876800 |
| H  | 4.30392700  | -2.07521600 | 0.02576700  |
| H  | 1.82333500  | -2.23771400 | 0.03085200  |
| C  | -1.64415700 | -0.07910800 | 0.00303500  |
| H  | -0.56925900 | -0.26581800 | 0.00572300  |
| Cl | -2.33892100 | -0.79886000 | 1.47035800  |
| Cl | -2.33399000 | -0.81364400 | -1.45927600 |
| Cl | -1.86880900 | 1.68791400  | -0.00628500 |

#### 3. Py-CHBr<sub>3</sub>

|   |            |            |             |
|---|------------|------------|-------------|
| C | 2.13777100 | 1.04762400 | -0.01598300 |
| C | 3.52137300 | 1.16944800 | -0.01716800 |
| C | 4.28782400 | 0.01204800 | 0.00164000  |

|    |             |             |             |
|----|-------------|-------------|-------------|
| C  | 3.64098100  | -1.21632900 | 0.02084000  |
| C  | 2.25224900  | -1.23309100 | 0.02032800  |
| N  | 1.50805600  | -0.12741900 | 0.00232800  |
| H  | 5.37064000  | 0.06631000  | 0.00137700  |
| H  | 1.50285300  | 1.92853900  | -0.03017300 |
| H  | 3.98123500  | 2.14993100  | -0.03248100 |
| H  | 4.19671300  | -2.14586400 | 0.03594300  |
| H  | 1.71001400  | -2.17388300 | 0.03503300  |
| C  | -1.63965500 | -0.05149400 | 0.00046900  |
| H  | -0.55351300 | -0.15465500 | 0.00031000  |
| Br | -2.30001800 | -0.92183900 | 1.59588700  |
| Br | -2.29877400 | -0.89830600 | -1.60799000 |
| Br | -2.01117900 | 1.85000900  | 0.01430200  |

#### 4. Py-CHI<sub>3</sub>

|   |             |             |             |
|---|-------------|-------------|-------------|
| C | 2.19077000  | 1.11688100  | -0.03423400 |
| C | 3.57881600  | 1.16396400  | -0.03049400 |
| C | 4.28167100  | -0.03280800 | 0.00657500  |
| C | 3.56991800  | -1.22451300 | 0.03831100  |
| C | 2.18239700  | -1.16684800 | 0.03145400  |
| N | 1.50018700  | -0.02261900 | -0.00415300 |
| H | 5.36575600  | -0.03672700 | 0.01073400  |
| H | 1.60335200  | 2.02971700  | -0.06225200 |
| H | 4.09098400  | 2.11787800  | -0.05600700 |
| H | 4.07487600  | -2.18213500 | 0.06790700  |
| H | 1.58892100  | -2.07601100 | 0.05578500  |
| C | -1.61743100 | -0.07778800 | -0.00179000 |
| H | -0.52540700 | -0.06517800 | -0.01243600 |
| I | -2.16588400 | -1.17478000 | 1.77259200  |
| I | -2.20734300 | -1.06621500 | -1.82558600 |
| I | -2.20501200 | 1.99821100  | 0.06825500  |

## SI.2.2 Geometrical and Topological Parameters of [Pyr-Hal] Dimers

**Table SI.2.1** Distances between Atoms and between Atoms and Critical Points (CPs). Data Reported in Units of  $10^{-10}$  m.

| Hal                     | $r(\text{N}\dots\text{H})$ | $r(\text{H}'\dots\text{X})$ | $r(\text{N}\dots\text{BCP1})$ | $r(\text{H}\dots\text{BCP1})$ | $r(\text{H}'\dots\text{BCP2})$ | $r(\text{X}\dots\text{BCP2})$ | $r(\text{N}\dots\text{RCP})$ | $r(\text{H}\dots\text{RCP})$ | $r(\text{X}\dots\text{RCP})$ | $r(\text{H}'\dots\text{RCP})$ |
|-------------------------|----------------------------|-----------------------------|-------------------------------|-------------------------------|--------------------------------|-------------------------------|------------------------------|------------------------------|------------------------------|-------------------------------|
| <b>CHF<sub>3</sub></b>  | 2.217                      | 2.823                       | 1.407                         | 0.810                         | 1.220                          | 1.608                         | 1.983                        | 1.513                        | 1.698                        | 1.380                         |
| <b>CHCl<sub>3</sub></b> | 2.080                      | 3.267                       | 1.341                         | 0.739                         | 1.290                          | 1.979                         | 1.988                        | 1.616                        | 2.033                        | 1.441                         |
| <b>CHBr<sub>3</sub></b> | 2.062                      | 3.515                       | 1.333                         | 0.729                         | 1.354                          | 2.162                         | 2.053                        | 1.699                        | 2.193                        | 1.467                         |
| <b>CHI<sub>3</sub></b>  | 2.026                      | 3.811                       | 1.314                         | 0.712                         | 1.410                          | 2.403                         | 2.109                        | 1.826                        | 2.414                        | 1.485                         |

## SI.2.3 Vibrational Frequencies, Normal Modes Decomposition, and Electric Properties of [Pyr-Hal] Dimers

**Table SI.2.2** Computed Ring Breathing ( $\omega_1$ ) and Triangle Mode ( $\omega_2$ ) Vibrational Frequencies (in harmonic and anharmonic approximation), Percentage Contribution of Selected Bond Distances to  $\omega_1$ , Modulus of the Electric Dipole Moment ( $p$ ), and Isotropic Static Electronic Polarizability ( $\alpha_e$ ).

| Hal                     | $\omega_1 / \text{cm}^{-1}$ | $\omega_2 / \text{cm}^{-1}$ | $\omega_1 / \text{cm}^{-1}$ | $\omega_2 / \text{cm}^{-1}$ | % Contribution of Internal Coordinates to $\omega_1$ |          |          |          |          |          | $p / \text{D}$ | $\alpha_e / \text{\AA}^3$ |           |
|-------------------------|-----------------------------|-----------------------------|-----------------------------|-----------------------------|------------------------------------------------------|----------|----------|----------|----------|----------|----------------|---------------------------|-----------|
|                         | (harm.)                     | (harm.)                     | (anharm.)                   | (anharm.)                   | $r(1,2)$                                             | $r(4,5)$ | $r(1,6)$ | $r(5,6)$ | $r(2,3)$ | $r(3,4)$ |                |                           | $r(6,13)$ |
| <b>CHF<sub>3</sub></b>  | 1028.34                     | 1059.84                     | 1010.62                     | 1093.41                     | 7.9                                                  | 7.7      | 4.9      | 4.8      | 3.2      | 3.1      | 7.5            | 4.91                      | 66.44     |
| <b>CHCl<sub>3</sub></b> | 1031.17                     | 1061.15                     | 1012.96                     | 1039.64                     | 8.5                                                  | 8.2      | 4.9      | 4.8      | 3.2      | 3.1      | 8.4            | 4.77                      | 121.95    |
| <b>CHBr<sub>3</sub></b> | 1031.81                     | 1060.74                     | 1013.40                     | 1012.44                     | 8.7                                                  | 8.3      | 4.8      | 4.8      | 3.3      | 3.2      | 8.5            | 4.72                      | 135.93    |
| <b>CHI<sub>3</sub></b>  | 1032.62                     | 1060.56                     | 1014.01                     | 999.15                      | 8.8                                                  | 8.4      | 4.8      | 4.8      | 3.3      | 3.2      | 8.8            | 4.68                      | 167.73    |

**Table SI.2.3** Statistical Parameters of Linear Regression of the Ring Breathing Wavenumber (Computed in Harmonic and Anharmonic Approximation) with Geometrical and Topological Parameters, Contribution of Selected Internal Coordinates to Normal Mode, and Electric Properties.

| #  | $x$                                                      | <i>Harmonic Approximation</i> |       |              |       |                             | <i>Anharmonic Approximation</i> |       |              |       |                             |
|----|----------------------------------------------------------|-------------------------------|-------|--------------|-------|-----------------------------|---------------------------------|-------|--------------|-------|-----------------------------|
|    |                                                          | <b>Intercept</b>              |       | <b>Slope</b> |       | <b>Adj-<math>R^2</math></b> | <b>Intercept</b>                |       | <b>Slope</b> |       | <b>Adj-<math>R^2</math></b> |
|    |                                                          | Value                         | Error | Value        | Error |                             | Value                           | Error | Value        | Error |                             |
| 1  | $r(\text{N}\dots\text{H}')$                              | 1077.50                       | 2.13  | -22.19       | 1.02  | 0.99374                     | 1049.86                         | 0.94  | -17.71       | 0.45  | 0.99807                     |
| 2  | $r(\text{H}\dots\text{X})$                               | 1016.48                       | 2.48  | 4.33         | 0.73  | 0.91820                     | 1001.28                         | 2.22  | 3.42         | 0.66  | 0.89635                     |
| 3  | $r(\text{N}\dots\text{BCP1})$                            | 1092.97                       | 2.68  | -45.97       | 1.99  | 0.99443                     | 1062.19                         | 1.32  | -36.67       | 0.98  | 0.99786                     |
| 4  | $r(\text{H}\dots\text{BCP1})$                            | 1063.05                       | 1.62  | -42.89       | 2.17  | 0.99237                     | 1038.34                         | 0.74  | -34.23       | 0.98  | 0.99752                     |
| 5  | $r(\text{X}\dots\text{BCP2})$                            | 1002.64                       | 6.65  | 21.50        | 5.04  | 0.85161                     | 990.40                          | 5.79  | 16.95        | 4.39  | 0.82284                     |
| 6  | $r(\text{H}'\dots\text{BCP2})$                           | 1019.95                       | 1.76  | 5.41         | 0.86  | 0.92848                     | 1004.02                         | 1.59  | 4.28         | 0.77  | 0.90818                     |
| 7  | $r(\text{N}\dots\text{RCP})$                             | 980.41                        | 27.07 | 24.88        | 13.31 | 0.45393                     | 973.41                          | 22.43 | 19.35        | 11.03 | 0.40919                     |
| 8  | $r(\text{H}\dots\text{RCP})$                             | 1009.31                       | 6.24  | 13.03        | 3.74  | 0.78732                     | 995.69                          | 5.33  | 10.25        | 3.20  | 0.75580                     |
| 9  | $r(\text{X}\dots\text{RCP})$                             | 1018.41                       | 2.01  | 6.03         | 0.96  | 0.92829                     | 1002.80                         | 1.81  | 4.77         | 0.86  | 0.90814                     |
| 10 | $r(\text{H}'\dots\text{RCP})$                            | 972.64                        | 4.05  | 40.43        | 2.81  | 0.98568                     | 966.40                          | 4.13  | 32.11        | 2.86  | 0.97659                     |
| 11 | $r(\text{N}\dots\text{BCP1})/r(\text{N}\dots\text{H}')$  | 839.04                        | 10.32 | 298.30       | 16.04 | 0.99138                     | 859.54                          | 5.02  | 238.08       | 7.79  | 0.99679                     |
| 12 | $r(\text{H}'\dots\text{BCP1})/r(\text{N}\dots\text{H}')$ | 1137.36                       | 5.72  | -298.38      | 16.03 | 0.99139                     | 1097.65                         | 2.78  | -238.15      | 7.80  | 0.99679                     |
| 13 | $r(\text{H}\dots\text{BCP2})/r(\text{H}\dots\text{X})$   | 1058.74                       | 1.51  | -70.17       | 3.80  | 0.99125                     | 1034.81                         | 1.62  | -55.77       | 4.09  | 0.98407                     |
| 14 | $r(\text{X}\dots\text{BCP2})/r(\text{H}\dots\text{X})$   | 987.69                        | 2.71  | 71.53        | 4.48  | 0.98832                     | 978.35                          | 2.82  | 56.83        | 4.65  | 0.98016                     |

|    |             |         |      |        |      |         |         |      |        |      |         |
|----|-------------|---------|------|--------|------|---------|---------|------|--------|------|---------|
| 15 | % $r(1,2)$  | 992.00  | 2.25 | 4.60   | 0.27 | 0.99009 | 981.70  | 1.92 | 3.66   | 0.23 | 0.98868 |
| 16 | % $r(4,5)$  | 982.31  | 2.14 | 5.97   | 0.26 | 0.99424 | 973.92  | 1.07 | 4.76   | 0.13 | 0.99775 |
| 17 | % $r(6,13)$ | 1003.46 | 1.33 | 3.32   | 0.16 | 0.99303 | 990.81  | 0.89 | 2.64   | 0.11 | 0.99506 |
| 18 | $p$         | 1118.28 | 4.41 | -18.30 | 0.93 | 0.99237 | 1082.14 | 4.80 | -14.55 | 1.01 | 0.98580 |
| 19 | $\alpha_e$  | 1025.64 | 0.62 | 0.04   | 0.00 | 0.96349 | 1008.51 | 0.57 | 0.03   | 0.00 | 0.95123 |

## SI.2.4 Regressions

*Harmonic Approximation*

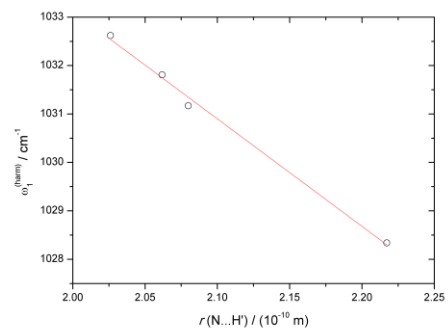

(1.h)

*Anharmonic Approximation*

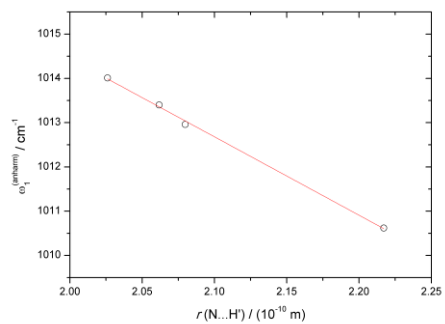

(1.a)

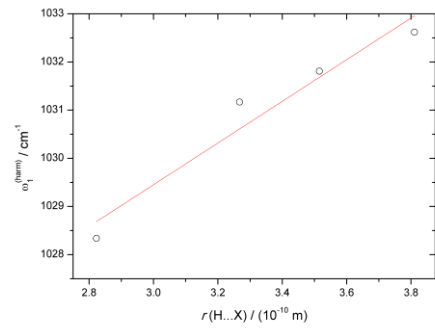

(2.h)

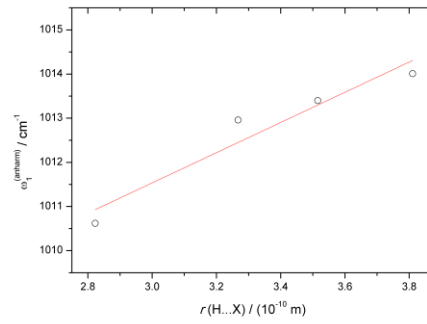

(2.a)

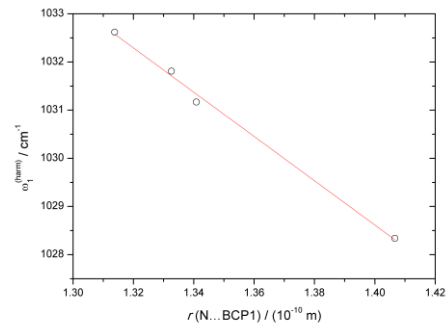

(3.h)

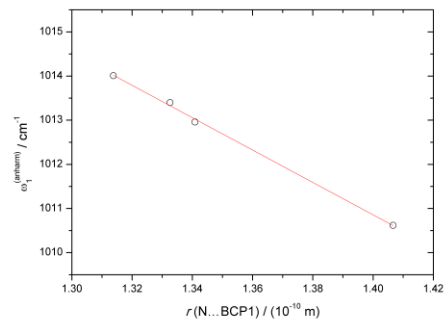

(3.a)

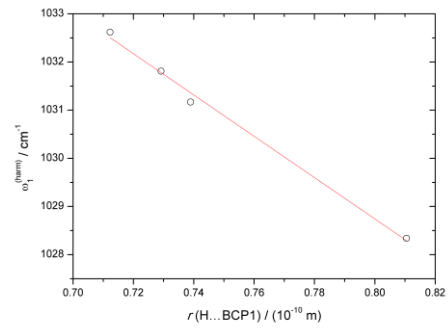

(4.h)

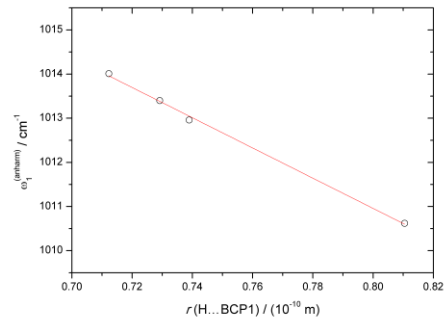

(4.a)

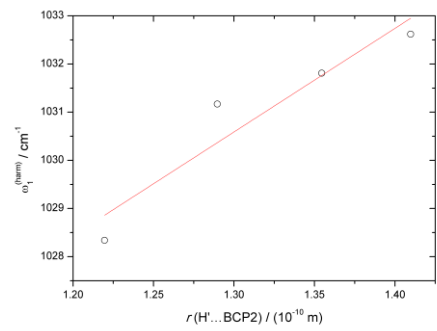

(5.h)

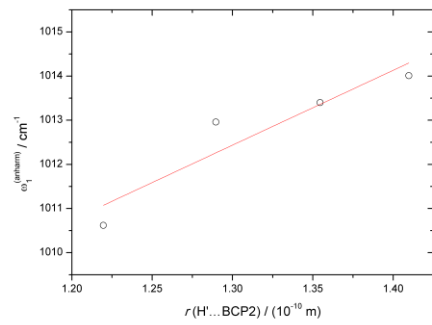

(5.a)

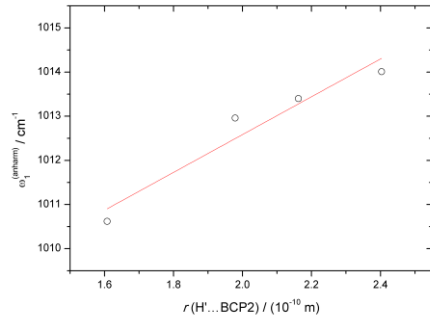

(6.h)

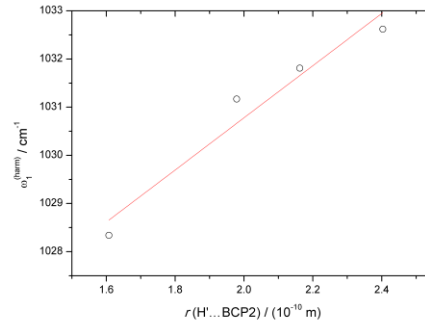

(6.a)

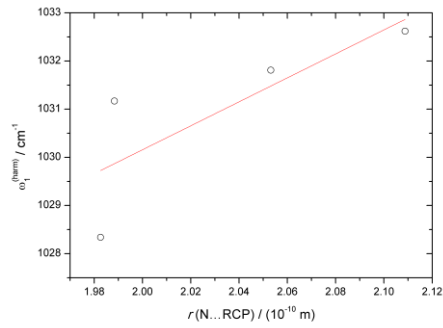

(7.h)

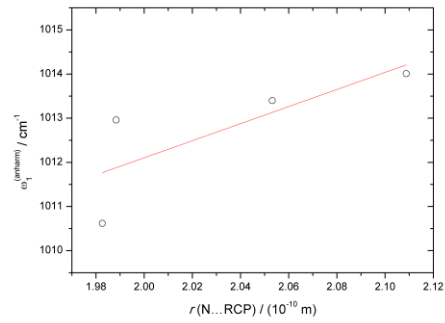

(7.a)



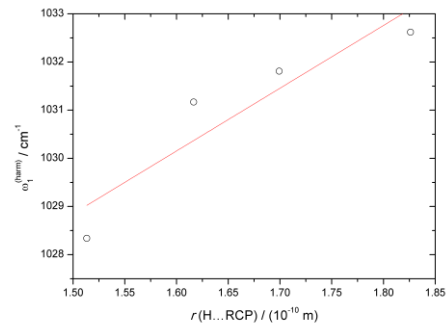

(8.h)

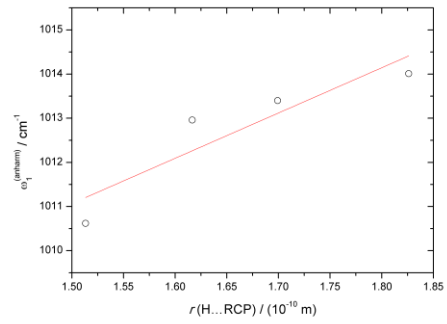

(8.a)

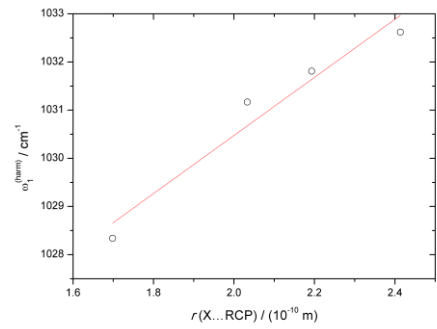

(9.h)

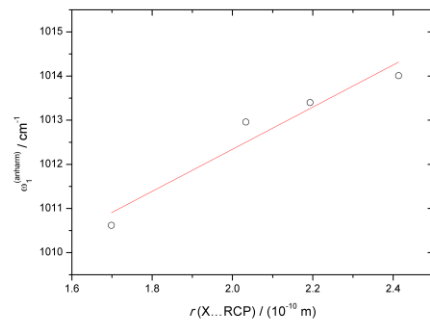

(9.a)

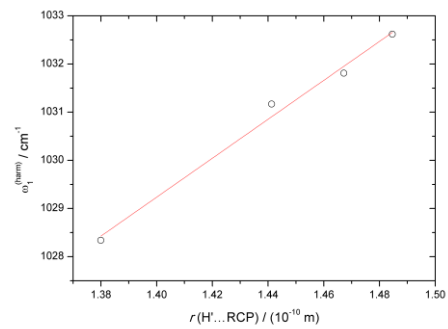

(10.h)

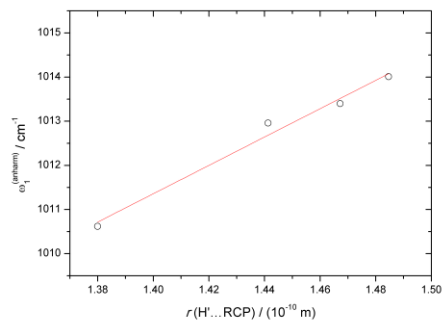

(10.a)

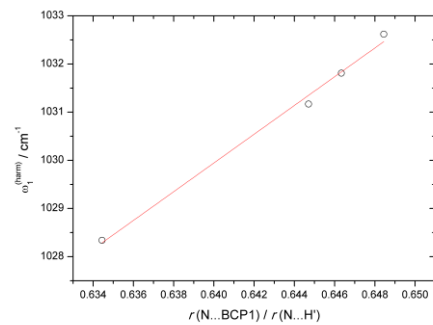

(11.h)

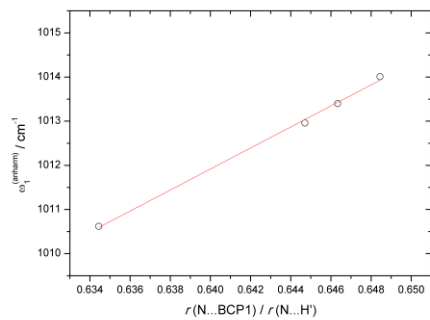

(11.a)

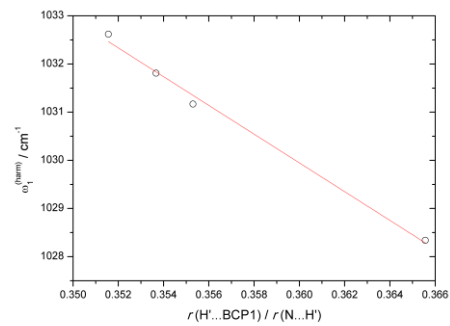

(12.h)

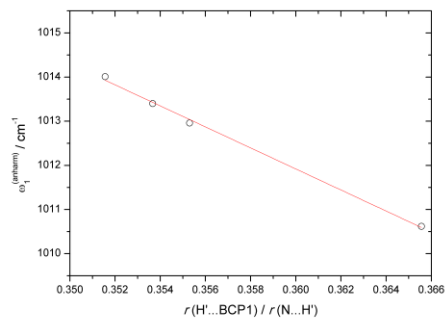

(12.a)

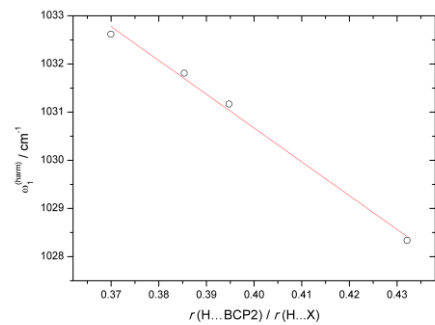

(13.h)

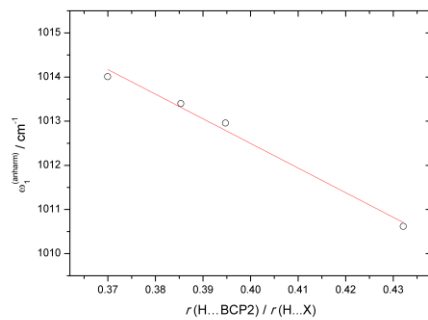

(13.a)

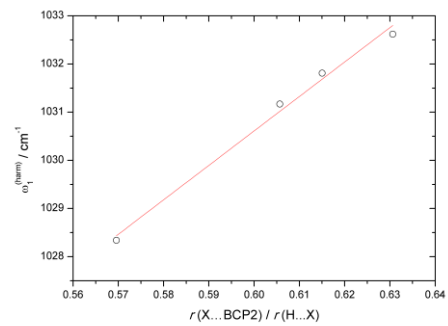

(14.h)

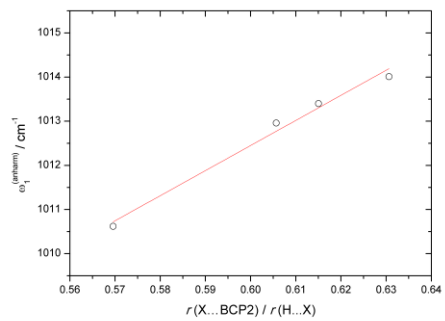

(14.a)

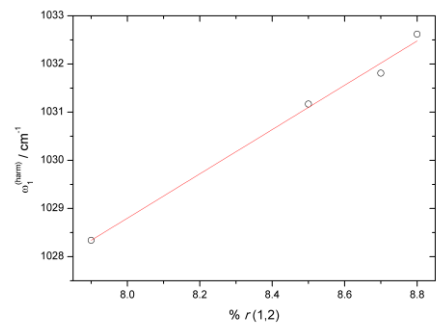

(15.h)

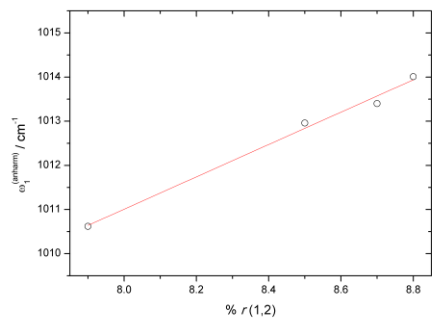

(15.a)

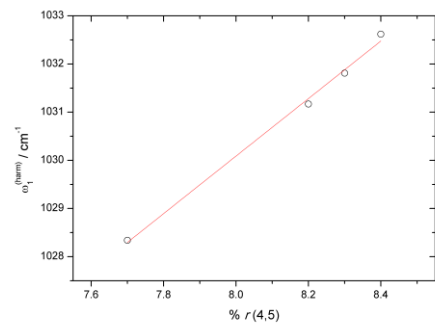

(16.h)

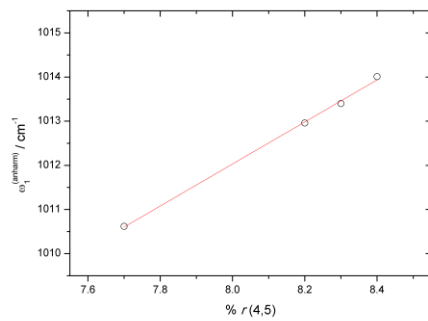

(16.a)

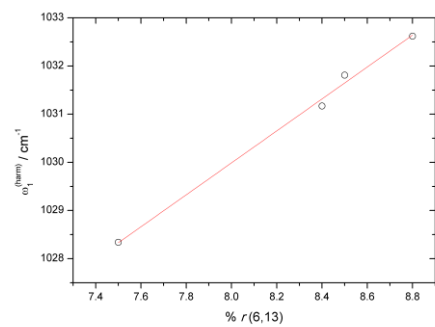

(17.h)

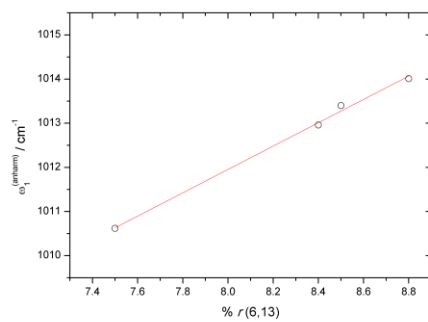

(17.a)

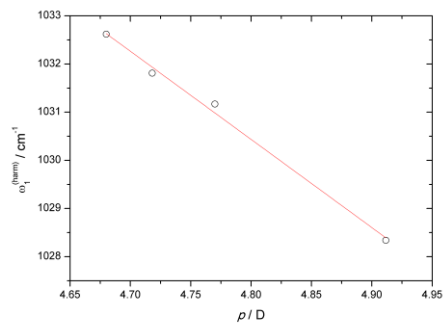

(18.h)

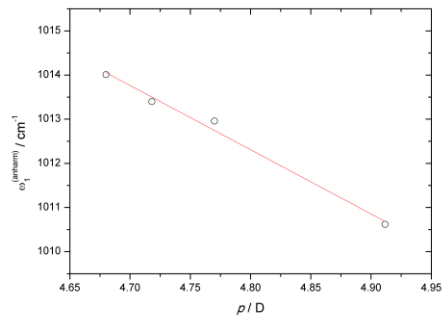

(18.a)

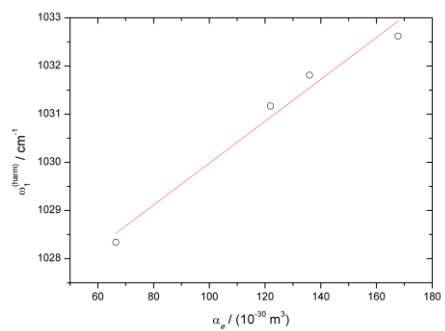

(19.h)

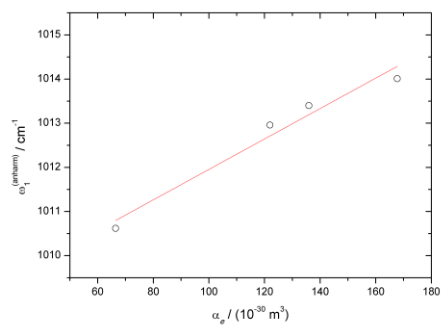

(19.a)

**Figure SI.2.1** Regressions of the Ring Breathing Wavenumber (Computed in Harmonic and Anharmonic Approximation) with Geometrical and Topological Parameters, Contribution of Selected Internal Coordinates to Normal Mode, and Electric Properties.

**SI.2.5 Geometrical , Charges of [Pyr–Hal] Dimers at MP2 / 6-311++G(d,p) (H, C, N) & DGDZVP (X)**

**Table SI.2.4 Analysis of geometrical parameters. (Distances B in 10<sup>-10</sup> m; bond angles A and dihedral angles D in degrees.)**

| py-CHF <sub>3</sub> |    |    |    | r        |          | a        |          | b1       |          | b2       |          | c        |          |
|---------------------|----|----|----|----------|----------|----------|----------|----------|----------|----------|----------|----------|----------|
|                     |    |    |    | *        | **       | *        | **       | *        | **       | *        | **       | *        | **       |
| B                   | 1  | 2  |    | 1.397426 | 1.397567 | 1.397437 | 1.397448 | 1.398390 | 1.397564 | 1.398319 | 1.397433 | 1.398289 | 1.398355 |
| B                   | 1  | 6  |    | 1.346013 | 1.345721 | 1.345227 | 1.345254 | 1.344141 | 1.345727 | 1.344189 | 1.345123 | 1.343788 | 1.344057 |
| B                   | 1  | 8  |    | 1.087431 | 1.087737 | 1.087686 | 1.087623 | 1.087788 | 1.087737 | 1.087846 | 1.087484 | 1.087991 | 1.087846 |
| B                   | 2  | 3  |    | 1.396218 | 1.396235 | 1.396356 | 1.396294 | 1.396574 | 1.396233 | 1.396506 | 1.396353 | 1.396607 | 1.396513 |
| B                   | 2  | 9  |    | 1.085462 | 1.085464 | 1.085456 | 1.085463 | 1.085758 | 1.085464 | 1.085766 | 1.085494 | 1.085795 | 1.085768 |
| B                   | 3  | 4  |    | 1.396425 | 1.396353 | 1.396356 | 1.396294 | 1.396419 | 1.396353 | 1.396506 | 1.396234 | 1.396607 | 1.396512 |
| B                   | 3  | 7  |    | 1.086080 | 1.086054 | 1.086066 | 1.086036 | 1.086235 | 1.086055 | 1.086238 | 1.086055 | 1.086276 | 1.086254 |
| B                   | 4  | 5  |    | 1.397432 | 1.397434 | 1.397437 | 1.397448 | 1.398233 | 1.397434 | 1.398318 | 1.397567 | 1.398289 | 1.398355 |
| B                   | 4  | 10 |    | 1.085494 | 1.085494 | 1.085455 | 1.085463 | 1.085771 | 1.085494 | 1.085765 | 1.085464 | 1.085795 | 1.085768 |
| B                   | 5  | 6  |    | 1.345177 | 1.345121 | 1.345227 | 1.345254 | 1.344222 | 1.345123 | 1.344189 | 1.345720 | 1.343789 | 1.344057 |
| B                   | 5  | 11 |    | 1.087497 | 1.087483 | 1.087687 | 1.087625 | 1.087902 | 1.087484 | 1.087847 | 1.087736 | 1.087990 | 1.087847 |
| B                   | 12 | 13 |    | 1.088305 | 1.088475 | 1.089724 | 1.089200 | 1.337935 | 1.346596 | 1.337872 | 1.346591 | 1.089979 | 1.089081 |
| B                   | 12 | 14 |    | 1.346494 | 1.346588 | 1.346812 | 1.348037 | 1.089234 | 1.088477 | 1.344132 | 1.350111 | 1.342343 | 1.342219 |
| B                   | 12 | 15 |    | 1.346492 | 1.346588 | 1.346812 | 1.348002 | 1.344099 | 1.350129 | 1.344132 | 1.346592 | 1.342336 | 1.342215 |
| B                   | 12 | 16 |    | 1.351725 | 1.350124 | 1.346115 | 1.347570 | 1.343968 | 1.346581 | 1.089220 | 1.088476 | 1.341251 | 1.341950 |
| A                   | 1  | 2  | 3  | 118.7    | 118.7    | 118.7    | 118.7    | 118.7    | 118.7    | 118.6    | 118.7    | 118.6    | 118.6    |
| A                   | 1  | 2  | 9  | 120.0    | 120.0    | 120.0    | 120.0    | 120.1    | 120.0    | 120.1    | 120.0    | 120.1    | 120.1    |
| A                   | 2  | 3  | 4  | 118.3    | 118.3    | 118.4    | 118.3    | 118.3    | 118.3    | 118.3    | 118.3    | 118.3    | 118.3    |
| A                   | 2  | 3  | 7  | 120.8    | 120.8    | 120.8    | 120.8    | 120.9    | 120.8    | 120.9    | 120.8    | 120.9    | 120.9    |
| A                   | 3  | 4  | 5  | 118.7    | 118.7    | 118.7    | 118.7    | 118.6    | 118.7    | 118.6    | 118.7    | 118.6    | 118.6    |
| A                   | 3  | 4  | 10 | 121.3    | 121.3    | 121.3    | 121.3    | 121.2    | 121.3    | 121.2    | 121.3    | 121.2    | 121.2    |
| A                   | 4  | 5  | 6  | 123.6    | 123.6    | 123.6    | 123.6    | 123.9    | 123.6    | 123.9    | 123.6    | 123.8    | 123.8    |

|   |   |   |    |    |       |       |       |       |       |       |       |       |       |       |
|---|---|---|----|----|-------|-------|-------|-------|-------|-------|-------|-------|-------|-------|
| A | 4 | 5 | 11 |    | 120.4 | 120.4 | 120.4 | 120.4 | 120.3 | 120.4 | 120.4 | 120.5 | 120.5 | 120.4 |
| D | 1 | 2 | 3  | 4  | 0.0   | 0.0   | 0.2   | 0.1   | 0.0   | 0.0   | 0.0   | 0.0   | 0.1   | 0.0   |
| D | 1 | 2 | 3  | 7  | 180.0 | 180.0 | 180.0 | 180.0 | 180.0 | 180.0 | 180.0 | 180.0 | 179.9 | 180.0 |
| D | 2 | 3 | 4  | 5  | 0.0   | 0.0   | 0.2   | 0.1   | 0.0   | 0.0   | 0.1   | 0.0   | 0.2   | 0.0   |
| D | 2 | 3 | 4  | 10 | 180.0 | 180.0 | 180.0 | 180.0 | 180.0 | 180.0 | 179.9 | 180.0 | 180.0 | 180.0 |
| D | 3 | 4 | 5  | 6  | 0.0   | 0.0   | 0.2   | 0.0   | 0.0   | 0.0   | 0.1   | 0.0   | 0.3   | 0.0   |
| D | 3 | 4 | 5  | 11 | 180.0 | 180.0 | 180.0 | 180.0 | 179.9 | 180.0 | 179.9 | 180.0 | 180.0 | 180.0 |

| py-CHCl <sub>3</sub> |    |    |   | r        |          | a        |          | b1       |          | b2       |          | c        |          |
|----------------------|----|----|---|----------|----------|----------|----------|----------|----------|----------|----------|----------|----------|
|                      |    |    |   | *        | **       | *        | **       | *        | **       | *        | **       | *        | **       |
| B                    | 1  | 2  |   | 1.397153 | 1.397438 | 1.397113 | 1.397383 | 1.397927 | 1.397388 | 1.397726 | 1.397384 | 1.398106 | 1.398323 |
| B                    | 1  | 6  |   | 1.345277 | 1.345510 | 1.344724 | 1.345169 | 1.344130 | 1.345169 | 1.344224 | 1.345169 | 1.343118 | 1.343878 |
| B                    | 1  | 8  |   | 1.087446 | 1.087519 | 1.087632 | 1.087602 | 1.087894 | 1.087603 | 1.087879 | 1.087600 | 1.088184 | 1.088036 |
| B                    | 2  | 3  |   | 1.396484 | 1.396348 | 1.396561 | 1.396382 | 1.396599 | 1.396379 | 1.396721 | 1.396381 | 1.396772 | 1.396592 |
| B                    | 2  | 9  |   | 1.085453 | 1.085477 | 1.085432 | 1.085472 | 1.085652 | 1.085473 | 1.085661 | 1.085471 | 1.085862 | 1.085775 |
| B                    | 3  | 4  |   | 1.396531 | 1.396372 | 1.396558 | 1.396382 | 1.396551 | 1.396382 | 1.396453 | 1.396381 | 1.396777 | 1.396591 |
| B                    | 3  | 7  |   | 1.086067 | 1.086056 | 1.086060 | 1.086050 | 1.086174 | 1.086049 | 1.086186 | 1.086051 | 1.086247 | 1.086243 |
| B                    | 4  | 5  |   | 1.397183 | 1.397374 | 1.397115 | 1.397382 | 1.397784 | 1.397381 | 1.398034 | 1.397384 | 1.398095 | 1.398323 |
| B                    | 4  | 10 |   | 1.085466 | 1.085483 | 1.085431 | 1.085471 | 1.085671 | 1.085474 | 1.085660 | 1.085471 | 1.085863 | 1.085774 |
| B                    | 5  | 6  |   | 1.344743 | 1.345123 | 1.344722 | 1.345169 | 1.344210 | 1.345166 | 1.344086 | 1.345169 | 1.343135 | 1.343876 |
| B                    | 5  | 11 |   | 1.087571 | 1.087548 | 1.087633 | 1.087602 | 1.087933 | 1.087598 | 1.087919 | 1.087600 | 1.088178 | 1.088037 |
| B                    | 12 | 13 |   | 1.089398 | 1.088720 | 1.090228 | 1.088983 | 1.768573 | 1.088960 | 1.769071 | 1.088936 | 1.084854 | 1.085177 |
| B                    | 12 | 14 |   | 1.768252 | 1.768444 | 1.773217 | 1.769849 | 1.084867 | 1.770270 | 1.773323 | 1.769806 | 1.771530 | 1.766993 |
| B                    | 12 | 15 |   | 1.768248 | 1.768441 | 1.773215 | 1.769866 | 1.773488 | 1.769755 | 1.773329 | 1.769823 | 1.771531 | 1.766985 |
| B                    | 12 | 16 |   | 1.771649 | 1.771921 | 1.772264 | 1.769038 | 1.773456 | 1.769095 | 1.084837 | 1.769001 | 1.770176 | 1.764927 |
| A                    | 1  | 2  | 3 | 118.7    | 118.7    | 118.7    | 118.7    | 118.7    | 118.7    | 118.7    | 118.7    | 118.6    | 118.6    |
| A                    | 1  | 2  | 9 | 120.0    | 120.0    | 120.0    | 120.0    | 120.1    | 120.0    | 120.1    | 120.0    | 120.2    | 120.1    |



|   |   |   |    |       |       |       |       |       |       |       |       |       |       |       |
|---|---|---|----|-------|-------|-------|-------|-------|-------|-------|-------|-------|-------|-------|
| A | 2 | 3 | 4  | 118.4 | 118.4 | 118.4 | 118.4 | 118.3 | 118.4 | 118.3 | 118.4 | 118.3 | 118.3 |       |
| A | 2 | 3 | 7  | 120.8 | 120.8 | 120.8 | 120.8 | 120.8 | 120.8 | 120.8 | 120.8 | 120.9 | 120.9 |       |
| A | 3 | 4 | 5  | 118.7 | 118.7 | 118.7 | 118.7 | 118.6 | 118.7 | 118.6 | 118.7 | 118.6 | 118.6 |       |
| A | 3 | 4 | 10 | 121.3 | 121.3 | 121.3 | 121.3 | 121.3 | 121.3 | 121.3 | 121.3 | 121.2 | 121.2 |       |
| A | 4 | 5 | 6  | 123.5 | 123.6 | 123.4 | 123.5 | 123.7 | 123.5 | 123.7 | 123.5 | 123.8 | 123.8 |       |
| A | 4 | 5 | 11 | 120.6 | 120.5 | 120.7 | 120.5 | 120.5 | 120.5 | 120.5 | 120.5 | 120.6 | 120.5 |       |
|   |   |   |    |       |       |       |       |       |       |       |       |       |       |       |
| D | 1 | 2 | 3  | 4     | 0.0   | 0.0   | 0.1   | 0.1   | 0.0   | 0.1   | 0.2   | 0.0   | 0.3   | 0.2   |
| D | 1 | 2 | 3  | 7     | 180.0 | 180.0 | 180.0 | 180.0 | 180.0 | 180.0 | 180.0 | 180.0 | 179.8 | 180.0 |
| D | 2 | 3 | 4  | 5     | 0.0   | 0.0   | 0.1   | 0.1   | 0.0   | 0.1   | 0.2   | 0.0   | 0.1   | 0.2   |
| D | 2 | 3 | 4  | 10    | 180.0 | 180.0 | 180.0 | 180.0 | 180.0 | 180.0 | 179.9 | 180.0 | 179.9 | 180.0 |
| D | 3 | 4 | 5  | 6     | 0.0   | 0.0   | 0.1   | 0.1   | 0.0   | 0.0   | 0.1   | 0.0   | 0.1   | 0.1   |
| D | 3 | 4 | 5  | 11    | 180.0 | 180.0 | 179.9 | 180.0 | 180.0 | 180.0 | 180.0 | 180.0 | 180.0 | 180.0 |

| py-CHBr <sub>3</sub> |    |    | r        |          | a        |          | b1       |          | b2       |          | c        |          |
|----------------------|----|----|----------|----------|----------|----------|----------|----------|----------|----------|----------|----------|
|                      |    |    | *        | **       | *        | **       | *        | **       | *        | **       | *        | **       |
| B                    | 1  | 2  | 1.397173 | 1.397423 | 1.397056 | 1.397324 | 1.397518 | 1.397601 | 1.397436 | 1.397685 | 1.398074 | 1.398273 |
| B                    | 1  | 6  | 1.345497 | 1.345524 | 1.344897 | 1.345191 | 1.344006 | 1.344584 | 1.344072 | 1.344500 | 1.343480 | 1.343954 |
| B                    | 1  | 8  | 1.087343 | 1.087511 | 1.087680 | 1.087629 | 1.087858 | 1.087968 | 1.087869 | 1.087805 | 1.088153 | 1.088076 |
| B                    | 2  | 3  | 1.396536 | 1.396414 | 1.396619 | 1.396445 | 1.396708 | 1.396546 | 1.396658 | 1.396564 | 1.396764 | 1.396639 |
| B                    | 2  | 9  | 1.085523 | 1.085488 | 1.085432 | 1.085471 | 1.085563 | 1.085582 | 1.085565 | 1.085590 | 1.085880 | 1.085794 |
| B                    | 3  | 4  | 1.396584 | 1.396430 | 1.396613 | 1.396444 | 1.396634 | 1.396503 | 1.396682 | 1.396564 | 1.396767 | 1.396638 |
| B                    | 3  | 7  | 1.086076 | 1.086070 | 1.086061 | 1.086057 | 1.086107 | 1.086126 | 1.086111 | 1.086122 | 1.086242 | 1.086244 |
| B                    | 4  | 5  | 1.397181 | 1.397351 | 1.397064 | 1.397323 | 1.397323 | 1.397751 | 1.397392 | 1.397684 | 1.398064 | 1.398273 |
| B                    | 4  | 10 | 1.085518 | 1.085489 | 1.085432 | 1.085471 | 1.085578 | 1.085606 | 1.085574 | 1.085590 | 1.085880 | 1.085794 |
| B                    | 5  | 6  | 1.344909 | 1.345140 | 1.344886 | 1.345191 | 1.344127 | 1.344548 | 1.344129 | 1.344501 | 1.343488 | 1.343952 |
| B                    | 5  | 11 | 1.087693 | 1.087628 | 1.087683 | 1.087628 | 1.087850 | 1.087612 | 1.087854 | 1.087809 | 1.088149 | 1.088074 |
| B                    | 12 | 13 | 1.090153 | 1.089965 | 1.092994 | 1.090839 | 1.948178 | 1.934244 | 1.948372 | 1.934570 | 1.084916 | 1.084800 |
| B                    | 12 | 14 | 1.936696 | 1.938887 | 1.943762 | 1.938584 | 1.085357 | 1.085301 | 1.944747 | 1.945059 | 1.942856 | 1.936469 |

|   |    |    |    |          |          |          |          |          |          |          |          |          |          |       |
|---|----|----|----|----------|----------|----------|----------|----------|----------|----------|----------|----------|----------|-------|
| B | 12 | 15 |    | 1.934986 | 1.933927 | 1.943769 | 1.938597 | 1.944659 | 1.942360 | 1.944739 | 1.945116 | 1.942857 | 1.936462 |       |
| B | 12 | 16 |    | 1.941688 | 1.942695 | 1.942631 | 1.937585 | 1.944562 | 1.945300 | 1.085335 | 1.085290 | 1.941611 | 1.934312 |       |
|   |    |    |    |          |          |          |          |          |          |          |          |          |          |       |
| A | 1  | 2  | 3  | 118.8    | 118.7    | 118.7    | 118.7    | 118.7    | 118.7    | 118.7    | 118.7    | 118.6    | 118.6    |       |
| A | 1  | 2  | 9  | 120.0    | 120.0    | 120.0    | 120.0    | 120.1    | 120.1    | 120.1    | 120.1    | 120.1    | 120.1    |       |
| A | 2  | 3  | 4  | 118.4    | 118.4    | 118.4    | 118.4    | 118.4    | 118.4    | 118.4    | 118.4    | 118.3    | 118.3    |       |
| A | 2  | 3  | 7  | 120.8    | 120.8    | 120.8    | 120.8    | 120.8    | 120.8    | 120.8    | 120.8    | 120.9    | 120.9    |       |
| A | 3  | 4  | 5  | 118.7    | 118.7    | 118.7    | 118.7    | 118.7    | 118.7    | 118.7    | 118.7    | 118.6    | 118.6    |       |
| A | 3  | 4  | 10 | 121.3    | 121.3    | 121.3    | 121.3    | 121.2    | 121.3    | 121.2    | 121.2    | 121.2    | 121.2    |       |
| A | 4  | 5  | 6  | 123.5    | 123.5    | 123.4    | 123.5    | 123.5    | 123.6    | 123.5    | 123.6    | 123.8    | 123.8    |       |
| A | 4  | 5  | 11 | 120.6    | 120.5    | 120.7    | 120.6    | 120.7    | 120.5    | 120.7    | 120.6    | 120.5    | 120.5    |       |
|   |    |    |    |          |          |          |          |          |          |          |          |          |          |       |
| D | 1  | 2  | 3  | 4        | 0.5      | 0.5      | 1.3      | 0.2      | 0.1      | 0.4      | 0.1      | 0.4      | 0.1      | 0.1   |
| D | 1  | 2  | 3  | 7        | 180.0    | 180.0    | 179.9    | 180.0    | 180.0    | 180.0    | 180.0    | 180.0    | 179.8    | 180.0 |
| D | 2  | 3  | 4  | 5        | 0.3      | 0.5      | 1.2      | 0.2      | 0.1      | 0.4      | 0.1      | 0.4      | 0.0      | 0.1   |
| D | 2  | 3  | 4  | 10       | 180.0    | 180.0    | 179.8    | 180.0    | 180.0    | 180.0    | 180.0    | 180.0    | 179.9    | 180.0 |
| D | 3  | 4  | 5  | 6        | 0.3      | 0.5      | 0.8      | 0.1      | 0.1      | 0.3      | 0.1      | 0.4      | 0.2      | 0.0   |
| D | 3  | 4  | 5  | 11       | 179.9    | 180.0    | 179.7    | 179.9    | 179.9    | 179.9    | 179.9    | 179.9    | 179.9    | 180.0 |

| py-CHI <sub>3</sub> |   |   | r        |          | a        |          | b1       |          | b2       |          | c        |          |
|---------------------|---|---|----------|----------|----------|----------|----------|----------|----------|----------|----------|----------|
|                     |   |   | *        | **       | *        | **       | *        | **       | *        | **       | *        | **       |
| B                   | 1 | 2 | 1.397178 | 1.397357 | 1.396995 | 1.397293 | 1.396617 | 1.397092 | 1.396561 | 1.397157 | 1.397840 | 1.398127 |
| B                   | 1 | 6 | 1.344615 | 1.345192 | 1.344820 | 1.345311 | 1.343929 | 1.344435 | 1.343911 | 1.344505 | 1.344146 | 1.344480 |
| B                   | 1 | 8 | 1.087501 | 1.087571 | 1.087699 | 1.087629 | 1.087682 | 1.087904 | 1.087672 | 1.087714 | 1.087706 | 1.087842 |
| B                   | 2 | 3 | 1.396663 | 1.396460 | 1.396677 | 1.396483 | 1.396839 | 1.396626 | 1.396789 | 1.396657 | 1.396638 | 1.396535 |
| B                   | 2 | 9 | 1.085498 | 1.085483 | 1.085453 | 1.085478 | 1.085434 | 1.085470 | 1.085434 | 1.085476 | 1.085903 | 1.085790 |
| B                   | 3 | 4 | 1.396732 | 1.396526 | 1.396702 | 1.396485 | 1.396723 | 1.396606 | 1.396808 | 1.396657 | 1.396577 | 1.396527 |
| B                   | 3 | 7 | 1.086061 | 1.086063 | 1.086052 | 1.086065 | 1.085982 | 1.086038 | 1.085985 | 1.086034 | 1.086210 | 1.086229 |
| B                   | 4 | 5 | 1.396820 | 1.397219 | 1.396959 | 1.397292 | 1.396479 | 1.397238 | 1.396539 | 1.397156 | 1.397815 | 1.398133 |

|   |    |    |    |          |          |          |          |          |          |          |          |          |          |       |
|---|----|----|----|----------|----------|----------|----------|----------|----------|----------|----------|----------|----------|-------|
| B | 4  | 10 |    | 1.085467 | 1.085471 | 1.085454 | 1.085478 | 1.085440 | 1.085496 | 1.085436 | 1.085475 | 1.085901 | 1.085789 |       |
| B | 5  | 6  |    | 1.345025 | 1.345292 | 1.344936 | 1.345312 | 1.344000 | 1.344654 | 1.343977 | 1.344507 | 1.344145 | 1.344469 |       |
| B | 5  | 11 |    | 1.087895 | 1.087750 | 1.087695 | 1.087630 | 1.087638 | 1.087512 | 1.087668 | 1.087718 | 1.087661 | 1.087831 |       |
| B | 12 | 13 |    | 1.095072 | 1.093483 | 1.096559 | 1.093477 | 2.196962 | 2.174957 | 2.197152 | 2.176082 | 1.086063 | 1.086152 |       |
| B | 12 | 14 |    | 2.165787 | 2.167671 | 2.178314 | 2.167869 | 1.087126 | 1.086954 | 2.178803 | 2.180847 | 2.178149 | 2.167109 |       |
| B | 12 | 15 |    | 2.165392 | 2.167121 | 2.178322 | 2.167858 | 2.178816 | 2.178087 | 2.178803 | 2.180888 | 2.178190 | 2.167097 |       |
| B | 12 | 16 |    | 2.167597 | 2.167533 | 2.177142 | 2.166684 | 2.179013 | 2.181034 | 1.087092 | 1.086940 | 2.178509 | 2.166822 |       |
|   |    |    |    |          |          |          |          |          |          |          |          |          |          |       |
| A | 1  | 2  | 3  | 118.7    | 118.7    | 118.7    | 118.7    | 118.7    | 118.7    | 118.7    | 118.7    | 118.7    | 118.7    |       |
| A | 1  | 2  | 9  | 120.0    | 120.0    | 120.0    | 120.0    | 120.0    | 120.0    | 120.0    | 120.0    | 120.0    | 120.1    |       |
| A | 2  | 3  | 4  | 118.5    | 118.4    | 118.5    | 118.4    | 118.5    | 118.4    | 118.5    | 118.5    | 118.2    | 118.2    |       |
| A | 2  | 3  | 7  | 120.8    | 120.8    | 120.8    | 120.8    | 120.8    | 120.8    | 120.8    | 120.8    | 120.9    | 120.9    |       |
| A | 3  | 4  | 5  | 118.7    | 118.7    | 118.7    | 118.7    | 118.7    | 118.7    | 118.7    | 118.7    | 118.7    | 118.7    |       |
| A | 3  | 4  | 10 | 121.3    | 121.3    | 121.3    | 121.3    | 121.3    | 121.3    | 121.3    | 121.3    | 121.2    | 121.2    |       |
| A | 4  | 5  | 6  | 123.3    | 123.5    | 123.3    | 123.5    | 123.1    | 123.3    | 123.1    | 123.3    | 123.8    | 123.8    |       |
| A | 4  | 5  | 11 | 120.7    | 120.6    | 120.8    | 120.6    | 121.0    | 120.7    | 121.1    | 120.8    | 120.5    | 120.5    |       |
|   |    |    |    |          |          |          |          |          |          |          |          |          |          |       |
| D | 1  | 2  | 3  | 4        | 0.1      | 0.0      | 1.2      | 0.3      | 0.3      | 0.4      | 0.2      | 0.6      | 0.6      | 0.1   |
| D | 1  | 2  | 3  | 7        | 180.0    | 180.0    | 179.9    | 180.0    | 180.0    | 180.0    | 180.0    | 180.0    | 179.7    | 179.9 |
| D | 2  | 3  | 4  | 5        | 0.1      | 0.0      | 1.1      | 0.3      | 0.3      | 0.4      | 0.2      | 0.6      | 0.9      | 0.1   |
| D | 2  | 3  | 4  | 10       | 180.0    | 180.0    | 179.8    | 180.0    | 180.0    | 180.0    | 179.9    | 180.0    | 179.9    | 180.0 |
| D | 3  | 4  | 5  | 6        | 0.0      | 0.0      | 0.7      | 0.2      | 0.2      | 0.4      | 0.1      | 0.6      | 1.2      | 0.1   |
| D | 3  | 4  | 5  | 11       | 180.0    | 180.0    | 179.6    | 179.8    | 180.0    | 179.9    | 180.0    | 179.9    | 179.6    | 180.0 |

**Table SI.2.5 Charges (Mul = Mulliken Population; NPA = Natural Population Analysis; ESP)**

|                   |    |    | *      |        |        | **     |        |        | ***    |        |        | ****   |        |        |
|-------------------|----|----|--------|--------|--------|--------|--------|--------|--------|--------|--------|--------|--------|--------|
|                   |    |    | Mul    | NPA    | ESP    |
| pyr               | 1  | C  | -0.384 | 0.025  | 0.451  | -0.059 | 0.028  | 0.432  | 0.213  | 0.020  | 0.425  | 0.239  | 0.012  | 0.427  |
|                   | 2  | C  | 0.063  | -0.222 | -0.378 | -0.312 | -0.226 | -0.374 | -0.718 | -0.234 | -0.383 | -0.237 | -0.228 | -0.369 |
|                   | 3  | C  | -0.229 | -0.183 | 0.212  | -0.099 | -0.185 | 0.203  | 0.306  | -0.193 | 0.201  | 0.234  | -0.190 | 0.206  |
|                   | 4  | C  | 0.063  | -0.222 | -0.394 | -0.312 | -0.226 | -0.386 | -0.718 | -0.234 | -0.393 | -0.234 | -0.228 | -0.378 |
|                   | 5  | C  | -0.384 | 0.025  | 0.462  | -0.059 | 0.028  | 0.441  | 0.213  | 0.020  | 0.432  | 0.241  | 0.012  | 0.433  |
|                   | 6  | N  | -0.055 | -0.410 | -0.651 | -0.245 | -0.419 | -0.635 | -0.717 | -0.423 | -0.631 | -0.693 | -0.398 | -0.627 |
|                   | 7  | H  | 0.192  | 0.205  | 0.044  | 0.237  | 0.208  | 0.048  | 0.289  | 0.216  | 0.053  | 0.061  | 0.213  | 0.045  |
|                   | 8  | H  | 0.187  | 0.183  | -0.005 | 0.206  | 0.185  | 0.002  | 0.307  | 0.195  | 0.009  | 0.063  | 0.189  | 0.002  |
|                   | 9  | H  | 0.180  | 0.208  | 0.131  | 0.218  | 0.211  | 0.133  | 0.259  | 0.219  | 0.139  | 0.134  | 0.214  | 0.130  |
|                   | 10 | H  | 0.180  | 0.208  | 0.137  | 0.218  | 0.211  | 0.137  | 0.259  | 0.219  | 0.143  | 0.128  | 0.214  | 0.133  |
|                   | 11 | H  | 0.187  | 0.183  | -0.009 | 0.206  | 0.185  | -0.001 | 0.307  | 0.195  | 0.006  | 0.065  | 0.189  | -0.001 |
| CHF <sub>3</sub>  | 1  | C  | 0.614  | 0.890  | 0.660  | 0.362  | 0.860  | 0.568  | 0.223  | 0.856  | 0.631  | -0.288 | 0.801  | 0.504  |
|                   | 2  | H  | 0.075  | 0.097  | 0.048  | 0.049  | 0.095  | 0.061  | 0.252  | 0.103  | 0.050  | 0.491  | 0.092  | 0.072  |
|                   | 3  | F  | -0.230 | -0.329 | -0.236 | -0.137 | -0.318 | -0.210 | -0.158 | -0.320 | -0.227 | -0.068 | -0.298 | -0.192 |
|                   | 4  | F  | -0.230 | -0.329 | -0.236 | -0.137 | -0.318 | -0.210 | -0.158 | -0.320 | -0.227 | -0.068 | -0.298 | -0.192 |
|                   | 5  | F  | -0.230 | -0.329 | -0.236 | -0.137 | -0.318 | -0.209 | -0.158 | -0.320 | -0.227 | -0.068 | -0.298 | -0.192 |
| CHCl <sub>3</sub> | 1  | C  | -0.391 | -0.350 | -0.059 | -0.560 | -0.398 | -0.172 | -0.849 | -0.414 | -0.253 | -0.804 | -0.459 | -0.257 |
|                   | 2  | H  | 0.204  | 0.189  | 0.190  | 0.192  | 0.192  | 0.213  | 0.395  | 0.208  | 0.235  | 0.303  | 0.190  | 0.236  |
|                   | 3  | Cl | 0.062  | 0.054  | -0.044 | 0.123  | 0.069  | -0.014 | 0.151  | 0.069  | 0.006  | 0.167  | 0.090  | 0.007  |
|                   | 4  | Cl | 0.062  | 0.054  | -0.044 | 0.123  | 0.069  | -0.013 | 0.151  | 0.069  | 0.006  | 0.167  | 0.090  | 0.007  |
|                   | 5  | Cl | 0.062  | 0.054  | -0.044 | 0.123  | 0.069  | -0.014 | 0.151  | 0.069  | 0.006  | 0.167  | 0.090  | 0.007  |
| CHBr <sub>3</sub> | 1  | C  | -0.244 | -0.595 |        | -0.318 | -0.645 |        | -0.628 | -0.659 |        | -0.684 | -0.677 |        |

|                  |   |    |        |        |        |        |        |        |        |        |
|------------------|---|----|--------|--------|--------|--------|--------|--------|--------|--------|
|                  | 2 | H  | 0.208  | 0.194  | 0.143  | 0.198  | 0.394  | 0.213  | 0.156  | 0.188  |
|                  | 3 | Br | 0.012  | 0.134  | 0.058  | 0.149  | 0.078  | 0.148  | 0.176  | 0.163  |
|                  | 4 | Br | 0.012  | 0.134  | 0.058  | 0.149  | 0.078  | 0.148  | 0.176  | 0.163  |
|                  | 5 | Br | 0.012  | 0.134  | 0.058  | 0.149  | 0.078  | 0.148  | 0.176  | 0.163  |
| CHI <sub>3</sub> | 1 | C  | -0.441 | -0.934 | -0.484 | -0.986 | -0.771 | -1.012 | -1.016 | -1.029 |
|                  | 2 | H  | 0.210  | 0.196  | 0.140  | 0.196  | 0.354  | 0.212  | 0.341  | 0.178  |
|                  | 3 | I  | 0.077  | 0.246  | 0.115  | 0.264  | 0.139  | 0.266  | 0.225  | 0.284  |
|                  | 4 | I  | 0.077  | 0.246  | 0.115  | 0.264  | 0.139  | 0.266  | 0.225  | 0.284  |
|                  | 5 | I  | 0.077  | 0.246  | 0.115  | 0.264  | 0.139  | 0.266  | 0.225  | 0.284  |

| py-CHF <sub>3</sub> |        |        |        |        |        |        | py-CHCl <sub>3</sub> |        |        |        |        |        |        |     |  |
|---------------------|--------|--------|--------|--------|--------|--------|----------------------|--------|--------|--------|--------|--------|--------|-----|--|
| Mul                 |        | r      |        |        |        | ESP    |                      | Mul    |        | r      |        |        |        | ESP |  |
| #                   | ##     | #      | ##     | #      | ##     | #      | ##                   | #      | ##     | #      | ##     | #      | ##     |     |  |
| C                   | -0.434 | -0.375 | 0.024  | 0.025  | 0.214  | 0.214  | C                    | -0.331 | -0.310 | 0.030  | 0.029  | 0.199  | 0.211  |     |  |
| C                   | 0.059  | -0.006 | -0.214 | -0.215 | -0.191 | -0.190 | C                    | -0.026 | -0.052 | -0.213 | -0.214 | -0.183 | -0.188 |     |  |
| C                   | -0.278 | -0.254 | -0.178 | -0.178 | 0.027  | 0.033  | C                    | -0.282 | -0.271 | -0.178 | -0.178 | 0.030  | 0.027  |     |  |
| C                   | -0.002 | -0.034 | -0.216 | -0.216 | -0.176 | -0.184 | C                    | -0.076 | -0.080 | -0.214 | -0.215 | -0.171 | -0.176 |     |  |
| C                   | -0.257 | -0.242 | 0.029  | 0.029  | 0.192  | 0.202  | C                    | -0.236 | -0.236 | 0.033  | 0.031  | 0.166  | 0.174  |     |  |
| N                   | -0.048 | -0.043 | -0.440 | -0.438 | -0.366 | -0.371 | N                    | -0.015 | -0.012 | -0.445 | -0.442 | -0.331 | -0.357 |     |  |
| H                   | 0.195  | 0.196  | 0.207  | 0.207  | 0.082  | 0.080  | H                    | 0.195  | 0.195  | 0.208  | 0.207  | 0.079  | 0.082  |     |  |
| H                   | 0.186  | 0.173  | 0.192  | 0.190  | 0.034  | 0.034  | H                    | 0.166  | 0.170  | 0.191  | 0.189  | 0.031  | 0.028  |     |  |
| H                   | 0.202  | 0.201  | 0.212  | 0.212  | 0.113  | 0.111  | H                    | 0.205  | 0.203  | 0.212  | 0.212  | 0.111  | 0.112  |     |  |
| H                   | 0.199  | 0.198  | 0.211  | 0.211  | 0.102  | 0.104  | H                    | 0.205  | 0.203  | 0.212  | 0.211  | 0.106  | 0.108  |     |  |
| H                   | 0.181  | 0.180  | 0.185  | 0.185  | 0.047  | 0.046  | H                    | 0.164  | 0.166  | 0.187  | 0.186  | 0.050  | 0.050  |     |  |
| C                   | 0.498  | 0.491  | 0.865  | 0.866  | 0.828  | 0.818  | C                    | -0.444 | -0.433 | -0.363 | -0.361 | -0.033 | -0.033 |     |  |
| H                   | 0.230  | 0.241  | 0.144  | 0.142  | -0.069 | -0.066 | H                    | 0.372  | 0.347  | 0.242  | 0.237  | 0.146  | 0.156  |     |  |

|   |        |        |        |        |        |        |    |       |       |       |       |        |        |
|---|--------|--------|--------|--------|--------|--------|----|-------|-------|-------|-------|--------|--------|
| F | -0.240 | -0.240 | -0.337 | -0.338 | -0.283 | -0.281 | Cl | 0.039 | 0.040 | 0.036 | 0.039 | -0.069 | -0.068 |
| F | -0.240 | -0.240 | -0.337 | -0.338 | -0.283 | -0.281 | Cl | 0.039 | 0.040 | 0.036 | 0.039 | -0.070 | -0.068 |
| F | -0.251 | -0.247 | -0.345 | -0.343 | -0.271 | -0.268 | Cl | 0.028 | 0.031 | 0.028 | 0.031 | -0.060 | -0.058 |

| <b>a</b> |        |        |        |        |        |        | <b>a</b> |        |        |        |        |        |        |
|----------|--------|--------|--------|--------|--------|--------|----------|--------|--------|--------|--------|--------|--------|
| Mul      |        | NPA    |        | ESP    |        | Mul    |          | NPA    |        | ESP    |        |        |        |
| #        | ##     | #      | ##     | #      | ##     | #      | ##       | #      | ##     | #      | ##     |        |        |
| C        | -0.255 | -0.255 | 0.029  | 0.028  | 0.157  | 0.181  | C        | -0.254 | -0.255 | 0.033  | 0.031  | 0.199  | 0.201  |
| C        | -0.099 | -0.098 | -0.215 | -0.215 | -0.176 | -0.198 | C        | -0.089 | -0.092 | -0.213 | -0.214 | -0.179 | -0.182 |
| C        | -0.228 | -0.226 | -0.178 | -0.178 | 0.034  | 0.050  | C        | -0.280 | -0.271 | -0.177 | -0.178 | 0.032  | 0.033  |
| C        | -0.099 | -0.098 | -0.215 | -0.215 | -0.175 | -0.199 | C        | -0.089 | -0.092 | -0.213 | -0.214 | -0.186 | -0.182 |
| C        | -0.255 | -0.256 | 0.029  | 0.028  | 0.161  | 0.178  | C        | -0.254 | -0.255 | 0.033  | 0.031  | 0.206  | 0.201  |
| N        | -0.035 | -0.037 | -0.437 | -0.438 | -0.306 | -0.322 | N        | -0.009 | -0.002 | -0.446 | -0.442 | -0.369 | -0.367 |
| H        | 0.196  | 0.196  | 0.208  | 0.208  | 0.079  | 0.077  | H        | 0.195  | 0.195  | 0.208  | 0.208  | 0.081  | 0.078  |
| H        | 0.172  | 0.173  | 0.186  | 0.186  | 0.058  | 0.051  | H        | 0.163  | 0.165  | 0.188  | 0.187  | 0.038  | 0.037  |
| H        | 0.200  | 0.200  | 0.211  | 0.212  | 0.108  | 0.113  | H        | 0.206  | 0.203  | 0.212  | 0.212  | 0.108  | 0.108  |
| H        | 0.200  | 0.200  | 0.211  | 0.212  | 0.107  | 0.114  | H        | 0.206  | 0.203  | 0.212  | 0.212  | 0.110  | 0.108  |
| H        | 0.172  | 0.173  | 0.186  | 0.186  | 0.056  | 0.053  | H        | 0.163  | 0.165  | 0.188  | 0.187  | 0.036  | 0.037  |
| C        | 0.469  | 0.468  | 0.863  | 0.863  | 0.918  | 0.908  | C        | -0.461 | -0.444 | -0.357 | -0.362 | -0.026 | -0.001 |
| H        | 0.281  | 0.284  | 0.139  | 0.144  | -0.123 | -0.115 | H        | 0.397  | 0.362  | 0.245  | 0.237  | 0.173  | 0.147  |
| F        | -0.240 | -0.241 | -0.339 | -0.340 | -0.298 | -0.297 | Cl       | 0.035  | 0.038  | 0.029  | 0.035  | -0.073 | -0.072 |
| F        | -0.240 | -0.241 | -0.339 | -0.340 | -0.298 | -0.296 | Cl       | 0.035  | 0.038  | 0.029  | 0.035  | -0.074 | -0.072 |
| F        | -0.240 | -0.241 | -0.338 | -0.339 | -0.301 | -0.299 | Cl       | 0.037  | 0.040  | 0.031  | 0.037  | -0.077 | -0.075 |

| <b>b1</b> |        |        |        |        |        |        | <b>b1</b> |        |        |        |        |        |        |
|-----------|--------|--------|--------|--------|--------|--------|-----------|--------|--------|--------|--------|--------|--------|
| Mul       |        | NPA    |        | ESP    |        | Mul    |           | NPA    |        | ESP    |        |        |        |
| #         | ##     | #      | ##     | #      | ##     | #      | ##        | #      | ##     | #      | ##     |        |        |
| C         | -0.340 | -0.375 | 0.026  | 0.025  | 0.288  | 0.218  | C         | -0.359 | -0.255 | 0.028  | 0.030  | 0.181  | 0.219  |
| C         | -0.016 | -0.006 | -0.222 | -0.215 | -0.266 | -0.204 | C         | -0.003 | -0.092 | -0.219 | -0.214 | -0.195 | -0.193 |
| C         | -0.200 | -0.254 | -0.183 | -0.178 | 0.099  | 0.046  | C         | -0.197 | -0.271 | -0.181 | -0.178 | 0.040  | 0.033  |
| C         | -0.015 | -0.034 | -0.223 | -0.216 | -0.263 | -0.192 | C         | 0.005  | -0.091 | -0.220 | -0.214 | -0.193 | -0.185 |
| C         | -0.332 | -0.242 | 0.025  | 0.029  | 0.296  | 0.203  | C         | -0.366 | -0.255 | 0.028  | 0.031  | 0.198  | 0.214  |

|   |        |        |        |        |        |        |    |        |        |        |        |        |        |
|---|--------|--------|--------|--------|--------|--------|----|--------|--------|--------|--------|--------|--------|
| N | -0.018 | -0.043 | -0.406 | -0.438 | -0.468 | -0.374 | N  | 0.020  | -0.002 | -0.419 | -0.442 | -0.321 | -0.387 |
| H | 0.193  | 0.196  | 0.204  | 0.207  | 0.064  | 0.077  | H  | 0.195  | 0.195  | 0.205  | 0.208  | 0.075  | 0.081  |
| H | 0.186  | 0.173  | 0.184  | 0.190  | 0.035  | 0.035  | H  | 0.179  | 0.165  | 0.185  | 0.187  | 0.053  | 0.032  |
| H | 0.181  | 0.201  | 0.208  | 0.212  | 0.114  | 0.115  | H  | 0.184  | 0.203  | 0.209  | 0.212  | 0.105  | 0.111  |
| H | 0.180  | 0.198  | 0.207  | 0.211  | 0.113  | 0.106  | H  | 0.184  | 0.203  | 0.209  | 0.212  | 0.104  | 0.108  |
| H | 0.180  | 0.180  | 0.181  | 0.185  | 0.019  | 0.046  | H  | 0.178  | 0.165  | 0.184  | 0.187  | 0.033  | 0.034  |
| C | 0.630  | 0.491  | 0.890  | 0.866  | 0.823  | 0.822  | C  | -0.423 | -0.444 | -0.347 | -0.362 | 0.078  | -0.019 |
| F | -0.221 | -0.240 | -0.316 | -0.338 | -0.296 | -0.281 | H  | 0.100  | 0.362  | 0.075  | 0.237  | -0.132 | 0.162  |
| H | 0.060  | 0.241  | 0.089  | 0.142  | -0.003 | -0.065 | Cl | 0.207  | 0.038  | 0.189  | 0.035  | 0.155  | -0.069 |
| F | -0.234 | -0.247 | -0.332 | -0.343 | -0.278 | -0.271 | Cl | 0.049  | 0.038  | 0.037  | 0.035  | -0.092 | -0.068 |
| F | -0.234 | -0.240 | -0.332 | -0.338 | -0.277 | -0.282 | Cl | 0.048  | 0.040  | 0.037  | 0.037  | -0.088 | -0.072 |

|   | b2     |        |        |        |        |        | b2  |        |        |        |        |        |        |
|---|--------|--------|--------|--------|--------|--------|-----|--------|--------|--------|--------|--------|--------|
|   | Mul    |        | NPA    |        | ESP    |        | Mul |        | NPA    |        | ESP    |        |        |
|   | #      | ##     | #      | ##     | #      | ##     | #   | ##     | #      | ##     | #      | ##     |        |
| C | -0.341 | -0.242 | 0.025  | 0.029  | 0.293  | 0.199  | C   | -0.255 | -0.369 | 0.028  | 0.031  | 0.185  | 0.198  |
| C | -0.011 | -0.034 | -0.223 | -0.216 | -0.264 | -0.191 | C   | -0.092 | 0.010  | -0.219 | -0.214 | -0.198 | -0.181 |
| C | -0.202 | -0.254 | -0.184 | -0.178 | 0.102  | 0.047  | C   | -0.271 | -0.205 | -0.182 | -0.178 | 0.045  | 0.038  |
| C | -0.011 | -0.006 | -0.223 | -0.215 | -0.271 | -0.201 | C   | -0.092 | 0.010  | -0.219 | -0.214 | -0.204 | -0.181 |
| C | -0.341 | -0.375 | 0.025  | 0.025  | 0.301  | 0.221  | C   | -0.255 | -0.368 | 0.028  | 0.031  | 0.192  | 0.198  |
| N | -0.019 | -0.043 | -0.406 | -0.438 | -0.469 | -0.372 | N   | -0.002 | 0.021  | -0.420 | -0.442 | -0.316 | -0.372 |
| H | 0.193  | 0.196  | 0.204  | 0.207  | 0.062  | 0.076  | H   | 0.195  | 0.195  | 0.205  | 0.208  | 0.073  | 0.076  |
| H | 0.184  | 0.180  | 0.183  | 0.185  | 0.025  | 0.047  | H   | 0.165  | 0.178  | 0.185  | 0.187  | 0.044  | 0.039  |
| H | 0.181  | 0.198  | 0.208  | 0.211  | 0.113  | 0.106  | H   | 0.203  | 0.184  | 0.209  | 0.212  | 0.107  | 0.108  |
| H | 0.181  | 0.201  | 0.208  | 0.212  | 0.115  | 0.113  | H   | 0.203  | 0.184  | 0.209  | 0.212  | 0.109  | 0.108  |
| H | 0.184  | 0.173  | 0.183  | 0.190  | 0.023  | 0.033  | H   | 0.165  | 0.178  | 0.185  | 0.187  | 0.041  | 0.039  |
| C | 0.626  | 0.491  | 0.890  | 0.866  | 0.819  | 0.831  | C   | -0.444 | -0.423 | -0.346 | -0.362 | 0.082  | 0.015  |
| F | -0.221 | -0.240 | -0.316 | -0.338 | -0.294 | -0.284 | Cl  | 0.362  | 0.100  | 0.074  | 0.237  | -0.134 | 0.146  |
| F | -0.234 | -0.247 | -0.332 | -0.343 | -0.275 | -0.273 | Cl  | 0.038  | 0.049  | 0.037  | 0.035  | -0.088 | -0.076 |
| F | -0.234 | -0.240 | -0.332 | -0.338 | -0.275 | -0.284 | Cl  | 0.038  | 0.049  | 0.037  | 0.035  | -0.088 | -0.076 |
| H | 0.065  | 0.241  | 0.089  | 0.142  | -0.005 | -0.070 | H   | 0.040  | 0.205  | 0.189  | 0.037  | 0.149  | -0.080 |

|   | c      |        |        |        |        |        | c   |        |        |        |        |        |        |
|---|--------|--------|--------|--------|--------|--------|-----|--------|--------|--------|--------|--------|--------|
|   | Mul    |        | NPA    |        | ESP    |        | Mul |        | NPA    |        | ESP    |        |        |
|   | #      | ##     | #      | ##     | #      | ##     | #   | ##     | #      | ##     | #      | ##     |        |
| C | -0.279 | -0.277 | 0.027  | 0.026  | 0.179  | 0.242  | C   | -0.321 | -0.316 | 0.026  | 0.026  | 0.120  | 0.166  |
| C | -0.097 | -0.087 | -0.222 | -0.222 | -0.200 | -0.241 | C   | 0.006  | -0.021 | -0.220 | -0.221 | -0.172 | -0.184 |
| C | -0.204 | -0.184 | -0.185 | -0.184 | 0.046  | 0.082  | C   | -0.264 | -0.239 | -0.184 | -0.184 | 0.030  | 0.034  |
| C | -0.097 | -0.087 | -0.222 | -0.222 | -0.200 | -0.241 | C   | 0.005  | -0.020 | -0.220 | -0.221 | -0.177 | -0.183 |
| C | -0.279 | -0.277 | 0.027  | 0.026  | 0.180  | 0.242  | C   | -0.321 | -0.316 | 0.026  | 0.026  | 0.126  | 0.165  |
| N | 0.037  | -0.009 | -0.414 | -0.408 | -0.322 | -0.404 | N   | 0.023  | 0.020  | -0.421 | -0.417 | -0.244 | -0.317 |
| H | 0.191  | 0.192  | 0.204  | 0.204  | 0.071  | 0.066  | H   | 0.189  | 0.191  | 0.204  | 0.204  | 0.073  | 0.072  |
| H | 0.179  | 0.179  | 0.184  | 0.184  | 0.055  | 0.043  | H   | 0.159  | 0.166  | 0.184  | 0.184  | 0.073  | 0.057  |
| H | 0.184  | 0.182  | 0.207  | 0.207  | 0.102  | 0.109  | H   | 0.190  | 0.187  | 0.207  | 0.208  | 0.096  | 0.098  |
| H | 0.184  | 0.182  | 0.207  | 0.207  | 0.102  | 0.109  | H   | 0.190  | 0.187  | 0.207  | 0.208  | 0.099  | 0.098  |
| H | 0.180  | 0.179  | 0.184  | 0.184  | 0.054  | 0.043  | H   | 0.159  | 0.166  | 0.184  | 0.184  | 0.070  | 0.057  |
| C | 0.613  | 0.626  | 0.896  | 0.893  | 0.616  | 0.593  | C   | -0.412 | -0.404 | -0.333 | -0.343 | -0.208 | -0.185 |
| H | 0.095  | 0.079  | 0.089  | 0.091  | 0.068  | 0.077  | H   | 0.272  | 0.255  | 0.193  | 0.187  | 0.262  | 0.237  |
| F | -0.236 | -0.233 | -0.328 | -0.328 | -0.249 | -0.239 | Cl  | 0.039  | 0.045  | 0.047  | 0.052  | -0.049 | -0.038 |
| F | -0.236 | -0.233 | -0.328 | -0.328 | -0.249 | -0.239 | Cl  | 0.039  | 0.045  | 0.047  | 0.052  | -0.048 | -0.038 |
| F | -0.233 | -0.232 | -0.326 | -0.328 | -0.251 | -0.241 | Cl  | 0.047  | 0.055  | 0.054  | 0.057  | -0.050 | -0.041 |

| py-CHBr <sub>3</sub> |        |        |        |        | py-CHI <sub>3</sub> |        |        |        |        |
|----------------------|--------|--------|--------|--------|---------------------|--------|--------|--------|--------|
|                      | r      |        |        |        |                     | r      |        |        |        |
|                      | Mul    |        | NPA    |        |                     | Mul    |        | NPA    |        |
|                      | #      | ##     | #      | ##     |                     | #      | ##     | #      | ##     |
| C                    | -0.340 | -0.310 | 0.031  | 0.030  | C                   | -0.268 | -0.255 | 0.036  | 0.033  |
| C                    | 0.004  | -0.032 | -0.213 | -0.214 | C                   | -0.022 | -0.048 | -0.212 | -0.213 |
| C                    | -0.321 | -0.308 | -0.178 | -0.178 | C                   | -0.364 | -0.354 | -0.177 | -0.178 |
| C                    | -0.043 | -0.058 | -0.214 | -0.215 | C                   | -0.126 | -0.095 | -0.211 | -0.213 |



|    |        |        |        |        |   |        |        |        |        |
|----|--------|--------|--------|--------|---|--------|--------|--------|--------|
| C  | -0.235 | -0.234 | 0.033  | 0.032  | C | -0.181 | -0.206 | 0.033  | 0.032  |
| N  | -0.022 | -0.020 | -0.447 | -0.445 | N | -0.049 | -0.038 | -0.450 | -0.447 |
| H  | 0.194  | 0.194  | 0.208  | 0.207  | H | 0.194  | 0.193  | 0.208  | 0.208  |
| H  | 0.170  | 0.173  | 0.191  | 0.190  | H | 0.173  | 0.173  | 0.190  | 0.189  |
| H  | 0.205  | 0.204  | 0.212  | 0.212  | H | 0.209  | 0.207  | 0.212  | 0.212  |
| H  | 0.205  | 0.204  | 0.212  | 0.211  | H | 0.207  | 0.206  | 0.212  | 0.212  |
| H  | 0.167  | 0.166  | 0.187  | 0.187  | H | 0.168  | 0.167  | 0.189  | 0.188  |
| C  | -0.301 | -0.311 | -0.599 | -0.598 | C | -0.283 | -0.266 | -0.937 | -0.934 |
| H  | 0.370  | 0.377  | 0.244  | 0.241  | H | 0.326  | 0.285  | 0.244  | 0.241  |
| Br | -0.011 | -0.011 | 0.114  | 0.114  | I | 0.006  | 0.011  | 0.221  | 0.224  |
| Br | -0.013 | -0.010 | 0.116  | 0.120  | I | 0.004  | 0.008  | 0.222  | 0.225  |
| Br | -0.028 | -0.024 | 0.104  | 0.106  | I | 0.007  | 0.011  | 0.219  | 0.223  |

| a   |        |        |        |        | a   |        |        |        |        |
|-----|--------|--------|--------|--------|-----|--------|--------|--------|--------|
| Mul |        | NPA    |        |        | Mul |        | NPA    |        |        |
| #   | ##     | #      | ##     | #      | ##  | #      | ##     | #      | ##     |
| C   | -0.260 | -0.262 | 0.034  | 0.032  | C   | -0.241 | -0.241 | 0.035  | 0.033  |
| C   | -0.059 | -0.063 | -0.213 | -0.214 | C   | -0.063 | -0.066 | -0.211 | -0.213 |
| C   | -0.330 | -0.320 | -0.177 | -0.178 | C   | -0.360 | -0.347 | -0.177 | -0.178 |
| C   | -0.059 | -0.063 | -0.213 | -0.214 | C   | -0.063 | -0.066 | -0.211 | -0.213 |
| C   | -0.260 | -0.261 | 0.034  | 0.032  | C   | -0.240 | -0.241 | 0.035  | 0.033  |
| N   | -0.020 | -0.012 | -0.448 | -0.445 | N   | -0.051 | -0.039 | -0.451 | -0.447 |
| H   | 0.193  | 0.194  | 0.208  | 0.208  | H   | 0.193  | 0.193  | 0.208  | 0.208  |
| H   | 0.163  | 0.165  | 0.189  | 0.188  | H   | 0.167  | 0.171  | 0.189  | 0.189  |
| H   | 0.208  | 0.206  | 0.212  | 0.212  | H   | 0.209  | 0.206  | 0.213  | 0.212  |
| H   | 0.208  | 0.206  | 0.212  | 0.212  | H   | 0.209  | 0.206  | 0.213  | 0.212  |
| H   | 0.163  | 0.165  | 0.189  | 0.188  | H   | 0.167  | 0.171  | 0.189  | 0.189  |
| C   | -0.373 | -0.358 | -0.590 | -0.600 | C   | -0.336 | -0.273 | -0.909 | -0.934 |
| H   | 0.481  | 0.448  | 0.248  | 0.243  | H   | 0.377  | 0.291  | 0.245  | 0.241  |
| Br  | -0.019 | -0.016 | 0.104  | 0.112  | I   | 0.009  | 0.009  | 0.210  | 0.222  |
| Br  | -0.019 | -0.016 | 0.104  | 0.112  | I   | 0.009  | 0.009  | 0.210  | 0.222  |

| Br        | -0.019 | -0.015 | 0.107  | 0.114  | I         | 0.013  | 0.015  | 0.213  | 0.226  |
|-----------|--------|--------|--------|--------|-----------|--------|--------|--------|--------|
| <b>b1</b> |        |        |        |        | <b>b1</b> |        |        |        |        |
| Mul       |        | NPA    |        |        | Mul       |        | NPA    |        |        |
|           | #      | ##     | #      | ##     |           | #      | ##     | #      | ##     |
| C         | -0.332 | -0.381 | 0.031  | 0.027  | C         | -0.276 | -0.320 | 0.033  | 0.029  |
| C         | -0.022 | 0.018  | -0.216 | -0.216 | C         | -0.076 | -0.036 | -0.209 | -0.212 |
| C         | -0.164 | -0.199 | -0.179 | -0.180 | C         | -0.119 | -0.147 | -0.176 | -0.178 |
| C         | -0.013 | 0.041  | -0.216 | -0.218 | C         | -0.068 | -0.039 | -0.210 | -0.214 |
| C         | -0.344 | -0.364 | 0.030  | 0.029  | C         | -0.286 | -0.292 | 0.033  | 0.031  |
| N         | -0.024 | -0.018 | -0.425 | -0.425 | N         | -0.064 | -0.070 | -0.433 | -0.430 |
| H         | 0.197  | 0.195  | 0.207  | 0.206  | H         | 0.201  | 0.199  | 0.209  | 0.208  |
| H         | 0.178  | 0.165  | 0.188  | 0.188  | H         | 0.179  | 0.167  | 0.193  | 0.192  |
| H         | 0.188  | 0.190  | 0.211  | 0.210  | H         | 0.193  | 0.193  | 0.213  | 0.212  |
| H         | 0.187  | 0.186  | 0.210  | 0.210  | H         | 0.193  | 0.190  | 0.213  | 0.212  |
| H         | 0.178  | 0.188  | 0.187  | 0.185  | H         | 0.178  | 0.188  | 0.192  | 0.188  |
| C         | -0.299 | -0.287 | -0.593 | -0.597 | C         | -0.582 | -0.566 | -0.937 | -0.937 |
| Br        | 0.080  | 0.072  | 0.156  | 0.164  | I         | 0.227  | 0.213  | 0.272  | 0.282  |
| H         | 0.209  | 0.209  | 0.193  | 0.192  | H         | 0.219  | 0.226  | 0.195  | 0.194  |
| Br        | -0.010 | -0.006 | 0.108  | 0.113  | I         | 0.041  | 0.047  | 0.205  | 0.213  |
| Br        | -0.010 | -0.010 | 0.109  | 0.111  | I         | 0.043  | 0.047  | 0.206  | 0.211  |
| <b>b2</b> |        |        |        |        | <b>b2</b> |        |        |        |        |
| Mul       |        | NPA    |        |        | Mul       |        | NPA    |        |        |
|           | #      | ##     | #      | ##     |           | #      | ##     | #      | ##     |
| C         | -0.344 | -0.348 | 0.030  | 0.029  | C         | -0.283 | -0.291 | 0.033  | 0.031  |
| C         | -0.006 | -0.002 | -0.216 | -0.217 | C         | -0.065 | -0.056 | -0.210 | -0.213 |
| C         | -0.174 | -0.177 | -0.179 | -0.180 | C         | -0.126 | -0.136 | -0.176 | -0.177 |
| C         | -0.006 | -0.003 | -0.216 | -0.217 | C         | -0.065 | -0.056 | -0.210 | -0.213 |
| C         | -0.344 | -0.348 | 0.030  | 0.029  | C         | -0.283 | -0.291 | 0.033  | 0.031  |
| N         | -0.024 | -0.025 | -0.425 | -0.424 | N         | -0.066 | -0.077 | -0.433 | -0.430 |
| H         | 0.197  | 0.196  | 0.207  | 0.206  | H         | 0.201  | 0.199  | 0.209  | 0.208  |

|    |        |        |        |        |   |        |        |        |        |
|----|--------|--------|--------|--------|---|--------|--------|--------|--------|
| H  | 0.177  | 0.179  | 0.188  | 0.187  | H | 0.178  | 0.180  | 0.193  | 0.190  |
| H  | 0.188  | 0.188  | 0.211  | 0.210  | H | 0.194  | 0.191  | 0.213  | 0.212  |
| H  | 0.188  | 0.188  | 0.211  | 0.210  | H | 0.194  | 0.191  | 0.213  | 0.212  |
| H  | 0.177  | 0.179  | 0.188  | 0.187  | H | 0.178  | 0.180  | 0.193  | 0.190  |
| C  | -0.301 | -0.295 | -0.592 | -0.595 | C | -0.586 | -0.580 | -0.937 | -0.936 |
| Br | 0.080  | 0.076  | 0.156  | 0.165  | I | 0.229  | 0.223  | 0.272  | 0.281  |
| Br | -0.009 | -0.007 | 0.108  | 0.110  | I | 0.042  | 0.048  | 0.205  | 0.210  |
| Br | -0.009 | -0.007 | 0.108  | 0.110  | I | 0.042  | 0.048  | 0.205  | 0.210  |
| H  | 0.209  | 0.209  | 0.193  | 0.192  | H | 0.218  | 0.227  | 0.195  | 0.194  |

|    | c      |        |        |        |   | c      |        |        |        |
|----|--------|--------|--------|--------|---|--------|--------|--------|--------|
|    | Mul    |        | NPA    |        |   | Mul    |        | NPA    |        |
|    | #      | ##     | #      | ##     |   | #      | ##     | #      | ##     |
| C  | -0.314 | -0.309 | 0.025  | 0.026  | C | -0.288 | -0.290 | 0.022  | 0.024  |
| C  | 0.028  | 0.003  | -0.220 | -0.220 | C | 0.002  | -0.011 | -0.218 | -0.219 |
| C  | -0.301 | -0.278 | -0.184 | -0.184 | C | -0.334 | -0.318 | -0.183 | -0.183 |
| C  | 0.027  | 0.003  | -0.220 | -0.220 | C | 0.002  | -0.008 | -0.218 | -0.219 |
| C  | -0.313 | -0.309 | 0.025  | 0.026  | C | -0.287 | -0.294 | 0.022  | 0.024  |
| N  | 0.008  | 0.009  | -0.422 | -0.419 | N | 0.025  | 0.022  | -0.428 | -0.425 |
| H  | 0.189  | 0.190  | 0.205  | 0.204  | H | 0.190  | 0.190  | 0.205  | 0.205  |
| H  | 0.163  | 0.168  | 0.184  | 0.184  | H | 0.166  | 0.175  | 0.185  | 0.184  |
| H  | 0.191  | 0.189  | 0.208  | 0.208  | H | 0.192  | 0.191  | 0.208  | 0.208  |
| H  | 0.191  | 0.189  | 0.208  | 0.208  | H | 0.192  | 0.191  | 0.208  | 0.208  |
| H  | 0.162  | 0.168  | 0.184  | 0.184  | H | 0.165  | 0.174  | 0.184  | 0.184  |
| C  | -0.223 | -0.221 | -0.572 | -0.584 | C | -0.399 | -0.394 | -0.900 | -0.920 |
| H  | 0.230  | 0.225  | 0.198  | 0.193  | H | 0.252  | 0.249  | 0.201  | 0.195  |
| Br | -0.015 | -0.012 | 0.125  | 0.130  | I | 0.037  | 0.039  | 0.234  | 0.242  |
| Br | -0.015 | -0.012 | 0.125  | 0.130  | I | 0.038  | 0.039  | 0.235  | 0.242  |
| Br | -0.008 | -0.003 | 0.132  | 0.137  | I | 0.045  | 0.048  | 0.241  | 0.248  |

\* 6-311++G(d,p)  
\*\* 6-311++G(2df,2p)  
\*\*\* 6-311++G(3df,3pd)  
\*\*\*\* aug-cc-pVTZ

# w/o CPC  
## w/ CPC
